# Supplementary material for: A coupled mechano-biochemical model for cell polarity guided anisotropic root growth
Source: eLife. 2021 Nov 1;10:e72132. doi: 10.7554/eLife.72132 (PMC8716106; doi:10.7554/eLife.72132)
Supplement: Figure 1—source data 1. [file elife-72132-fig1-data1.xlsx]

## Sheet: Figure 1D
	hypocotyl	root
replicate 1	2.97808	16.1402
replicate 2	4.1208	21.142
replicate 3	2.9101	15.4045
	growth rate (%)
