# Supplementary material for: A coupled mechano-biochemical model for cell polarity guided anisotropic root growth
Source: eLife. 2021 Nov 1;10:e72132. doi: 10.7554/eLife.72132 (PMC8716106; doi:10.7554/eLife.72132)
Supplement: Figure 2—figure supplement 4—source data 1. [file elife-72132-fig2-figsupp4-data1.xlsx]

## Sheet: Figure 2—figure supplement 4
Position	Anisotropy	sd
0	0.1465	0.037423
0.0133333	0.20199	0.116356
0.0266667	0.27311	0.084799
0.04	0.305864	0.0896118
0.0533333	0.333384	0.128191
0.0666667	0.342182	0.130148
0.08	0.522088	0.121385
0.0933333	0.517167	0.173909
0.106667	0.781012	0.177461
0.12	0.717701	0.203658
0.133333	0.845272	0.119505
0.146667	0.629493	0.130001
0.16	0.779729	0.148781
0.173333	0.748216	0.15319
0.186667	0.760725	0.13142
0.2	0.79259	0.107172
0.213333	0.803609	0.113661
0.226667	0.767961	0.12164
0.24	0.785304	0.120734
0.253333	0.79834	0.115515
0.266667	0.815688	0.0973774
0.28	0.835888	0.0794433
0.293333	0.840573	0.0771789
0.306667	0.82559	0.0903405
0.32	0.821265	0.0887818
0.333333	0.807926	0.0899274
0.346667	0.819102	0.0865221
0.36	0.803336	0.0987455
0.373333	0.790614	0.104645
0.386667	0.785626	0.108784
0.4	0.765894	0.114854
0.413333	0.780224	0.115101
0.426667	0.755559	0.124545
0.44	0.751174	0.130228
0.453333	0.755692	0.135827
0.466667	0.727571	0.138423
0.48	0.734847	0.143658
0.493333	0.734741	0.145002
0.506667	0.730725	0.152708
0.52	0.725361	0.151471
0.533333	0.711274	0.159415
0.546667	0.695601	0.16167
0.56	0.685888	0.16524
0.573333	0.663183	0.169446
0.586667	0.660618	0.173722
0.6	0.638904	0.174737
0.613333	0.628156	0.182839
0.626667	0.608099	0.185327
0.64	0.609249	0.203732
0.653333	0.564879	0.20783
0.666667	0.545851	0.217138
0.68	0.52587	0.220694
0.693333	0.494359	0.224295
0.706667	0.467322	0.217475
0.72	0.457081	0.215029
0.733333	0.450532	0.213573
0.746667	0.446482	0.214175
0.76	0.447856	0.217469
0.773333	0.446335	0.216701
0.786667	0.444135	0.21549
0.8	0.450064	0.21801
0.813333	0.456463	0.219807
0.826667	0.445069	0.21586
0.84	0.44853	0.21468
0.853333	0.428434	0.202156
0.866667	0.436448	0.208068
0.88	0.390573	0.181524
0.893333	0.409611	0.200553
0.906667	0.453002	0.226925
0.92	0.478347	0.232975
0.933333	0.493286	0.22344
0.946667	0.492399	0.218468
0.96	0.516194	0.211115
0.973333	0.490169	0.193928
0.986667	0.41342	0.130754
1	0.337247	0.123513
