# Supplementary material for: A coupled mechano-biochemical model for cell polarity guided anisotropic root growth
Source: eLife. 2021 Nov 1;10:e72132. doi: 10.7554/eLife.72132 (PMC8716106; doi:10.7554/eLife.72132)
Supplement: Figure 2—figure supplement 5—source data 1. [file elife-72132-fig2-figsupp5-data1.xlsx]

## Sheet: Figure 2—figure supplement 5H
Relative position along the axis	Growth Rate (1/h)
0	0.0153294
0.0126582	0.00995735
0.0253165	0.00995695
0.0379747	0.0132226
0.0506329	0.0176489
0.0632911	0.0213247
0.0759494	0.0243591
0.0886076	0.0280591
0.101266	0.0331758
0.113924	0.0379617
0.126582	0.0404405
0.139241	0.0412771
0.151899	0.0420614
0.164557	0.0433141
0.177215	0.0441764
0.189873	0.0440364
0.202532	0.0432537
0.21519	0.0423188
0.227848	0.0414516
0.240506	0.040752
0.253165	0.0401945
0.265823	0.0396837
0.278481	0.0390933
0.291139	0.0382711
0.303797	0.0370873
0.316456	0.0354466
0.329114	0.0336073
0.341772	0.0323534
0.35443	0.0318064
0.367089	0.0306955
0.379747	0.0283081
0.392405	0.0255008
0.405063	0.0230641
0.417722	0.0212362
0.43038	0.0199598
0.443038	0.0187647
0.455696	0.017226
0.468354	0.0150634
0.481013	0.0125562
0.493671	0.0105616
0.506329	0.00926866
0.518987	0.00824864
0.531646	0.00735587
0.544304	0.00665261
0.556962	0.00607566
0.56962	0.00548114
0.582278	0.00488773
0.594937	0.00444028
0.607595	0.00417282
0.620253	0.00399562
0.632911	0.00383806
0.64557	0.00368791
0.658228	0.00354314
0.670886	0.00342468
0.683544	0.00336816
0.696203	0.00339561
0.708861	0.00346411
0.721519	0.0035118
0.734177	0.00348371
0.746835	0.00336946
0.759494	0.00317638
0.772152	0.00291189
0.78481	0.00258904
0.797468	0.00223544
0.810127	0.00188103
0.822785	0.00155572
0.835443	0.00128941
0.848101	0.00110003
0.860759	0.000977877
0.873418	0.000909401
0.886076	0.000881029
0.898734	0.000879192
0.911392	0.000890322
0.924051	0.00090085
0.936709	0.000897209
0.949367	0.00086583
0.962025	0.000793144
0.974684	0.000665584
0.987342	0.000469581
1	0.000191566

## Sheet: Figure 2—figure supplement 5I
Relative position along the axis of division event
34.0754
34.0939
34.115
34.1386
34.1641
34.1923
34.2232
34.2575
34.2962
34.3387
34.3838
34.4302
34.4769
34.5232
34.5695
34.6158
34.6644
34.7175
34.7752
34.8363
34.9004
34.9665
35.0339
35.1028
35.1734
35.2462
35.321
35.3975
35.4758
35.5557
35.6361
35.7155
35.7939
35.8719
35.9499
36.0276
36.1052
36.1833
36.2629
36.3446
36.4291
36.5159
36.6051
36.6971
36.7925
36.8915
36.994
37.0999
37.209
37.321
37.4358
37.5532
37.6734
37.7962
37.922
38.0509
38.183
38.3184
38.4571
38.599
-2.11151
14.15
49.5039
47.0878
14.9829
29.3593
51.3468
48.3332
38.9895
15.4229
46.7276
15.5545
32.7717
42.5244
42.6123
37.7754
35.3567
14.431
34.4944
31.4242
6.522
-7.41118
-8.34278
51.7016
55.0893
-7.12936
29.8717
11.9262
-6.27644
29.8182
50.8924
18.6105
0.584972
45.5794
32.8132
25.5202
14.5953
14.89
57.3627
64.5242
29.1167
74.1786
77.6615
-4.54861
47.3678
27.3393
28.9976
80.632
83.2868
79.3968
87.9938
55.4953
58.3153
56.271
37.2605
5.6724
8.18121
76.9833
87.8742
84.769
58.4509
43.7905
14.2172
68.8014
5.05999
88.389
32.0571
16.8535
14.5665
88.3297
35.8986
81.8106
78.5645
71.0018
71.5744
64.7119
81.9911
33.8054
16.1424
69.5155
92.8656
65.7346
71.5835
19.8242
67.6663
54.5876
64.004
61.9636
49.6164
12.6611
57.8702
22.5652
86.0321
-5.34621
56.5306
26.5378
61.8511
52.1568
90.0064
33.3613
47.4898
15.9394
48.0309
74.5316
46.0094
36.8339
84.2194
72.8722
45.461
98.0059
66.0486
88.06
27.3125
24.4211
12.8367
110.035
54.8757
14.4931
45.4374
34.8884
97.9177
59.5877
40.7519
77.6788
43.7585
-7.64872
24.213
68.8312
22.8048
42.25
66.1835
47.7342
53.5261
113.197
14.766
4.68988
15.8512
-2.3604
15.5073
97.8213
46.58
52.5379
83.0218
99.2159
81.8262
67.382
26.3502
69.3062
66.6747
128.726
95.8014
76.818
-14.3636
106.931
105.299
-1.28365
137.718
119.443
21.3907
122.861
43.5598
41.1926
16.6512
56.1969
16.4649
18.5437
32.0157
37.2581
6.40085
58.6807
3.42447
11.9192
55.9959
117.046
46.7194
131.592
141.255
53.1809
87.7599
110.911
41.4767
144.834
100.11
132.289
33.924
79.4204
68.4247
18.2654
102.151
116.288
127.385
147.053
122.335
87.3256
152.662
94.6922
80.9335
90.8428
47.3027
134.588
62.2538
113.679
146.099
124.754
39.3793
133.026
137.196
13.6524
143.596
120.002
7.17591
104.831
72.3382
95.5948
116.515
120.76
127.565
119.279
35.8078
18.585
77.2663
44.6828
103.599
83.5187
30.8825
115.01
-11.3046
157.608
58.7577
156.608
153.026
138.292
134.087
75.1771
34.4783
63.6339
50.4209
17.4101
14.0652
49.5366
51.4358
71.3982
84.8463
43.391
64.7887
81.2535
50.2657
165.214
111.672
29.2704
27.1635
33.9732
102.742
112.369
110.706
-0.488024
41.2435
-8.99585
88.7379
80.5197
73.9457
96.6368
22.722
-7.19601
-6.53848
130.861
27.6056
29.1251
56.6221
47.016
125.482
17.6424
149.446
31.7966
105.724
119.023
111.89
96.8661
154.929
39.5062
157.283
66.8026
48.9468
112.196
46.8037
49.1183
77.4138
-6.81232
64.7391
93.5601
96.9257
94.5418
23.2863
66.2156
62.0703
7.30159
60.4022
92.7546
17.1976
170.461
92.977
124.76
29.6088
92.1564
83.4004
84.5434
82.6491
63.3108
53.4224
139.485
44.6831
-3.93584
66.7415
55.6373
21.1427
16.6629
139.139
167.599
127.986
87.1712
70.951
12.6583
18.6204
109.277
84.6455
119.928
123.582
115.8
0.475918
26.2797
44.1925
15.7943
96.275
126.258
99.4273
68.8338
55.631
13.1477
46.3233
48.154
12.1804
136.42
127.979
107.351
96.4839
86.8172
75.3773
64.5942
28.5023
11.745
161.715
154.72
175.068
92.3759
176.812
169.254
48.9179
15.9466
54.975
160.562
33.8121
38.2979
42.1779
46.4338
93.6506
85.3638
137.755
52.885
37.0621
71.0408
55.9568
61.3203
7.59019
268.488
-8.4641
12.5122
14.4696
133.243
53.4962
114.317
118.784
109.278
37.6904
126.558
83.0593
172.219
70.8961
183.032
149.247
201.056
144.093
139.518
236.466
44.074
34.7611
100.4
66.9798
165.178
86.4249
64.5566
39.4164
52.2854
84.7463
58.6676
124.62
1.71762
106.568
52.7495
136.57
43.4788
175.572
100.612
80.5029
95.5202
0.666622
9.3535
102.867
33.6469
31.0044

## Sheet: Figure 2—figure supplement 5J
Relative position along the axis	Auxin Conc. [IAA] non-Vasc	Auxin Conc. [IAA] Vasc
0	0.95126	0.577464
0.0126582	0.967156	0.396023
0.0253165	1.18174	0.353855
0.0379747	1.50966	0.390833
0.0506329	1.4727	0.41729
0.0632911	1.13304	0.427533
0.0759494	0.83696	0.419507
0.0886076	0.648794	0.380966
0.101266	0.609265	0.422672
0.113924	0.554182	0.414586
0.126582	0.544305	0.423198
0.139241	0.522545	0.415435
0.151899	0.506541	0.435816
0.164557	0.444914	0.430231
0.177215	0.403586	0.433805
0.189873	0.417447	0.455744
0.202532	0.391943	0.414136
0.21519	0.398473	0.405782
0.227848	0.412532	0.417744
0.240506	0.394484	0.406284
0.253165	0.39791	0.421291
0.265823	0.385557	0.42446
0.278481	0.37103	0.42557
0.291139	0.345064	0.409215
0.303797	0.374532	0.440007
0.316456	0.369777	0.432517
0.329114	0.380072	0.446024
0.341772	0.378667	0.458352
0.35443	0.352347	0.451265
0.367089	0.362047	0.47787
0.379747	0.371259	0.497961
0.392405	0.376896	0.507501
0.405063	0.338176	0.465372
0.417722	0.350868	0.468794
0.43038	0.351951	0.457247
0.443038	0.357202	0.451016
0.455696	0.365156	0.453401
0.468354	0.355834	0.44553
0.481013	0.34696	0.442837
0.493671	0.326824	0.429576
0.506329	0.325189	0.432198
0.518987	0.347522	0.456112
0.531646	0.32946	0.440548
0.544304	0.335232	0.451707
0.556962	0.33077	0.452988
0.56962	0.338864	0.463551
0.582278	0.31182	0.434014
0.594937	0.309414	0.425989
0.607595	0.327219	0.439034
0.620253	0.303806	0.414851
0.632911	0.300756	0.413947
0.64557	0.313391	0.42608
0.658228	0.292455	0.398715
0.670886	0.297922	0.396128
0.683544	0.284496	0.380113
0.696203	0.263086	0.361156
0.708861	0.272086	0.372018
0.721519	0.26457	0.36472
0.734177	0.258229	0.357936
0.746835	0.252453	0.351152
0.759494	0.27723	0.373935
0.772152	0.263184	0.357374
0.78481	0.270398	0.361884
0.797468	0.250944	0.339566
0.810127	0.269296	0.354292
0.822785	0.263029	0.343325
0.835443	0.264639	0.339328
0.848101	0.251728	0.321135
0.860759	0.246537	0.312607
0.873418	0.238108	0.304289
0.886076	0.234679	0.305162
0.898734	0.228345	0.306197
0.911392	0.227726	0.314266
0.924051	0.221742	0.316541
0.936709	0.190369	0.29125
0.949367	0.174841	0.277881
0.962025	0.181198	0.280724
0.974684	0.195597	0.284189
0.987342	0.200029	0.26852
1	0.246199	0.283673

## Sheet: Figure 2—figure supplement 5K
Line	Time after cell division	PINs rel. abundance		Intervals	Time after cell division	PINs rel. abundance (min)	PINs rel. abundance (max)
1	0	0.0510172		1	0	0.0486782	0.0533562
2	0.01	0.0526211		2	0.01	0.050213	0.0550293
3	0.02	0.0542178		3	0.02	0.0517411	0.0566944
4	0.03	0.055807		4	0.03	0.0532625	0.0583514
5	0.04	0.0573886		5	0.04	0.0547771	0.0600001
6	0.05	0.0589626		6	0.05	0.0562847	0.0616405
7	0.06	0.060529		7	0.06	0.0577855	0.0632725
8	0.07	0.0620878		8	0.07	0.0592794	0.0648962
9	0.08	0.0636387		9	0.08	0.0607661	0.0665113
10	0.09	0.0651817		10	0.09	0.0622456	0.0681177
11	0.1	0.0667168		11	0.1	0.0637181	0.0697156
12	0.11	0.068244		12	0.11	0.0651833	0.0713047
13	0.12	0.0697631		13	0.12	0.0666413	0.072885
14	0.13	0.0712741		14	0.13	0.0680918	0.0744564
15	0.14	0.072777		15	0.14	0.069535	0.0760191
16	0.15	0.0742718		16	0.15	0.0709708	0.0775727
17	0.16	0.0757582		17	0.16	0.0723991	0.0791173
18	0.17	0.0772364		18	0.17	0.0738199	0.0806528
19	0.18	0.0787063		19	0.18	0.0752332	0.0821794
20	0.19	0.0801678		20	0.19	0.0766388	0.0836968
21	0.2	0.081621		21	0.2	0.0780369	0.0852051
22	0.21	0.0830656		22	0.21	0.0794272	0.086704
23	0.22	0.0845018		23	0.22	0.0808099	0.0881937
24	0.23	0.0859296		24	0.23	0.0821849	0.0896744
25	0.24	0.0873489		25	0.24	0.0835522	0.0911457
26	0.25	0.0887597		26	0.25	0.0849117	0.0926078
27	0.26	0.090162		27	0.26	0.0862634	0.0940605
28	0.27	0.0915557		28	0.27	0.0876072	0.0955041
29	0.28	0.0929407		29	0.28	0.0889433	0.0969382
30	0.29	0.094317		30	0.29	0.0902712	0.0983628
31	0.3	0.0956847		31	0.3	0.0915914	0.0997781
32	0.31	0.0970439		32	0.31	0.0929036	0.101184
33	0.32	0.0983944		33	0.32	0.094208	0.102581
34	0.33	0.0997364		34	0.33	0.0955045	0.103968
35	0.34	0.10107		35	0.34	0.0967931	0.105346
36	0.35	0.102394		36	0.35	0.0980737	0.106714
37	0.36	0.103709		37	0.36	0.0993456	0.108071
38	0.37	0.105014		38	0.37	0.10061	0.109419
39	0.38	0.106312		39	0.38	0.101866	0.110758
40	0.39	0.107601		40	0.39	0.103115	0.112088
41	0.4	0.108882		41	0.4	0.104356	0.113408
42	0.41	0.110153		42	0.41	0.105588	0.114719
43	0.42	0.111417		43	0.42	0.106813	0.11602
44	0.43	0.112672		44	0.43	0.108031	0.117313
45	0.44	0.113918		45	0.44	0.10924	0.118597
46	0.45	0.115157		46	0.45	0.110442	0.119871
47	0.46	0.116386		47	0.46	0.111636	0.121135
48	0.47	0.117607		48	0.47	0.112822	0.122391
49	0.48	0.118819		49	0.48	0.114	0.123638
50	0.49	0.120024		50	0.49	0.115171	0.124876
51	0.5	0.121221		51	0.5	0.116335	0.126106
52	0.51	0.122409		52	0.51	0.117491	0.127328
53	0.52	0.12359		53	0.52	0.118639	0.128541
54	0.53	0.124762		54	0.53	0.11978	0.129745
55	0.54	0.125926		55	0.54	0.120913	0.13094
56	0.55	0.127083		56	0.55	0.122039	0.132127
57	0.56	0.12823		57	0.56	0.123157	0.133303
58	0.57	0.129368		58	0.57	0.124266	0.13447
59	0.58	0.130497		59	0.58	0.125367	0.135626
60	0.59	0.131617		60	0.59	0.12646	0.136774
61	0.6	0.132731		61	0.6	0.127547	0.137915
62	0.61	0.133837		62	0.61	0.128627	0.139048
63	0.62	0.134935		63	0.62	0.129698	0.140172
64	0.63	0.136026		64	0.63	0.130763	0.141288
65	0.64	0.137109		65	0.64	0.131821	0.142397
66	0.65	0.138184		66	0.65	0.132871	0.143498
67	0.66	0.139252		67	0.66	0.133914	0.144591
68	0.67	0.140312		68	0.67	0.13495	0.145675
69	0.68	0.141365		69	0.68	0.135979	0.146751
70	0.69	0.142403		70	0.69	0.136996	0.14781
71	0.7	0.143432		71	0.7	0.138005	0.148858
72	0.71	0.144452		72	0.71	0.139007	0.149897
73	0.72	0.145465		73	0.72	0.140001	0.150929
74	0.73	0.146472		74	0.73	0.140989	0.151954
75	0.74	0.147471		75	0.74	0.141971	0.152972
76	0.75	0.148464		76	0.75	0.142946	0.153983
77	0.76	0.14945		77	0.76	0.143914	0.154986
78	0.77	0.15043		78	0.77	0.144875	0.155985
79	0.78	0.1514		79	0.78	0.145827	0.156972
80	0.79	0.152362		80	0.79	0.146772	0.157952
81	0.8	0.153315		81	0.8	0.147709	0.158921
82	0.81	0.154265		82	0.81	0.148643	0.159887
83	0.82	0.155204		83	0.82	0.149567	0.16084
84	0.83	0.15614		84	0.83	0.150488	0.161793
85	0.84	0.157071		85	0.84	0.151403	0.162739
86	0.85	0.15799		86	0.85	0.152309	0.163672
87	0.86	0.158903		87	0.86	0.153208	0.164598
88	0.87	0.159814		88	0.87	0.154104	0.165523
89	0.88	0.160719		89	0.88	0.154995	0.166443
90	0.89	0.161619		90	0.89	0.15588	0.167357
91	0.9	0.162516		91	0.9	0.156762	0.16827
92	0.91	0.163406		92	0.91	0.157638	0.169174
93	0.92	0.164293		93	0.92	0.158509	0.170076
94	0.93	0.165174		94	0.93	0.159374	0.170974
95	0.94	0.16605		95	0.94	0.160233	0.171868
96	0.95	0.166903		96	0.95	0.161076	0.172729
97	0.96	0.167751		97	0.96	0.161915	0.173587
98	0.97	0.168591		98	0.97	0.162746	0.174436
99	0.98	0.169431		99	0.98	0.163574	0.175288
100	0.99	0.170264		100	0.99	0.164394	0.176133
101	1	0.171091		101	1	0.165208	0.176973
102	1.01	0.171903		102	1.01	0.16601	0.177797
103	1.02	0.172716		103	1.02	0.166809	0.178622
104	1.03	0.173524		104	1.03	0.167605	0.179443
105	1.04	0.17433		105	1.04	0.168398	0.180261
106	1.05	0.175131		106	1.05	0.169188	0.181074
107	1.06	0.175937		107	1.06	0.169981	0.181894
108	1.07	0.176747		108	1.07	0.170775	0.182719
109	1.08	0.177559		109	1.08	0.17157	0.183548
110	1.09	0.178362		110	1.09	0.172357	0.184368
111	1.1	0.179166		111	1.1	0.173141	0.18519
112	1.11	0.179968		112	1.11	0.173924	0.186011
113	1.12	0.180762		113	1.12	0.1747	0.186824
114	1.13	0.181554		114	1.13	0.175473	0.187634
115	1.14	0.182345		115	1.14	0.176244	0.188446
116	1.15	0.183133		116	1.15	0.177012	0.189254
117	1.16	0.183892		117	1.16	0.177761	0.190024
118	1.17	0.184646		118	1.17	0.178505	0.190787
119	1.18	0.185396		119	1.18	0.179245	0.191548
120	1.19	0.186136		120	1.19	0.179975	0.192297
121	1.2	0.186872		121	1.2	0.180702	0.193043
122	1.21	0.18759		122	1.21	0.181415	0.193765
123	1.22	0.188301		123	1.22	0.182122	0.194479
124	1.23	0.188955		124	1.23	0.182792	0.195117
125	1.24	0.189606		125	1.24	0.183458	0.195754
126	1.25	0.19026		126	1.25	0.184124	0.196395
127	1.26	0.190935		127	1.26	0.184803	0.197066
128	1.27	0.19162		128	1.27	0.185485	0.197755
129	1.28	0.192316		129	1.28	0.18617	0.198462
130	1.29	0.193023		130	1.29	0.186858	0.199188
131	1.3	0.19373		131	1.3	0.187545	0.199916
132	1.31	0.194422		132	1.31	0.188215	0.200629
133	1.32	0.195103		133	1.32	0.188872	0.201334
134	1.33	0.195768		134	1.33	0.189518	0.202019
135	1.34	0.196439		135	1.34	0.190167	0.20271
136	1.35	0.19713		136	1.35	0.190829	0.203431
137	1.36	0.197837		137	1.36	0.191497	0.204176
138	1.37	0.198544		138	1.37	0.192163	0.204924
139	1.38	0.199267		139	1.38	0.192839	0.205696
140	1.39	0.19997		140	1.39	0.193499	0.206441
141	1.4	0.200668		141	1.4	0.194155	0.207181
142	1.41	0.201347		142	1.41	0.194798	0.207896
143	1.42	0.202039		143	1.42	0.195451	0.208626
144	1.43	0.202725		144	1.43	0.196097	0.209353
145	1.44	0.203419		145	1.44	0.196747	0.210091
146	1.45	0.204035		146	1.45	0.197353	0.210717
147	1.46	0.204684		147	1.46	0.19798	0.211387
148	1.47	0.205342		148	1.47	0.198616	0.212068
149	1.48	0.205994		149	1.48	0.199246	0.212743
150	1.49	0.206647		150	1.49	0.199876	0.213419
151	1.5	0.207343		151	1.5	0.200534	0.214152
152	1.51	0.208011		152	1.51	0.201172	0.21485
153	1.52	0.208676		153	1.52	0.201813	0.215539
154	1.53	0.209328		154	1.53	0.20245	0.216206
155	1.54	0.210023		155	1.54	0.203114	0.216931
156	1.55	0.210712		156	1.55	0.203779	0.217646
157	1.56	0.211418		157	1.56	0.204456	0.218379
158	1.57	0.212144		158	1.57	0.205148	0.21914
159	1.58	0.212886		159	1.58	0.205848	0.219924
160	1.59	0.213654		160	1.59	0.206567	0.220741
161	1.6	0.21447		161	1.6	0.207321	0.221618
162	1.61	0.215328		162	1.61	0.208098	0.222559
163	1.62	0.216233		163	1.62	0.208905	0.22356
164	1.63	0.217162		164	1.63	0.209732	0.224592
165	1.64	0.21807		165	1.64	0.210551	0.22559
166	1.65	0.218978		166	1.65	0.211367	0.226589
167	1.66	0.21994		167	1.66	0.212219	0.22766
168	1.67	0.220708		168	1.67	0.21295	0.228466
169	1.68	0.221536		169	1.68	0.213721	0.229351
170	1.69	0.222384		170	1.69	0.214512	0.230257
171	1.7	0.223263		171	1.7	0.215324	0.231202
172	1.71	0.224081		172	1.71	0.216099	0.232064
173	1.72	0.224911		173	1.72	0.216881	0.23294
174	1.73	0.22575		174	1.73	0.217669	0.23383
175	1.74	0.226621		175	1.74	0.218485	0.234757
176	1.75	0.227538		176	1.75	0.219339	0.235737
177	1.76	0.228467		177	1.76	0.220201	0.236733
178	1.77	0.22943		178	1.77	0.221087	0.237772
179	1.78	0.230423		179	1.78	0.221997	0.238849
180	1.79	0.231396		180	1.79	0.222895	0.239897
181	1.8	0.232366		181	1.8	0.223797	0.240934
182	1.81	0.233349		182	1.81	0.224704	0.241993
183	1.82	0.23439		183	1.82	0.225649	0.243131
184	1.83	0.235469		184	1.83	0.226626	0.244312
185	1.84	0.236596		185	1.84	0.227633	0.245559
186	1.85	0.237711		186	1.85	0.228641	0.246781
187	1.86	0.23886		187	1.86	0.229672	0.248048
188	1.87	0.240023		188	1.87	0.230715	0.249331
189	1.88	0.241222		189	1.88	0.231785	0.25066
190	1.89	0.242418		190	1.89	0.232856	0.251981
191	1.9	0.243627		191	1.9	0.233927	0.253327
192	1.91	0.24484		192	1.91	0.235001	0.254679
193	1.92	0.246093		193	1.92	0.236103	0.256083
194	1.93	0.247333		194	1.93	0.237196	0.25747
195	1.94	0.248568		195	1.94	0.238276	0.258861
196	1.95	0.249787		196	1.95	0.239327	0.260247
197	1.96	0.251029		197	1.96	0.240382	0.261675
198	1.97	0.252291		198	1.97	0.241448	0.263133
199	1.98	0.253611		199	1.98	0.242549	0.264673
200	1.99	0.254912		200	1.99	0.243621	0.266202
201	2	0.256204		201	2	0.244697	0.267711
202	2.01	0.257451		202	2.01	0.245731	0.269172
203	2.02	0.258745		203	2.02	0.246796	0.270693
204	2.03	0.260106		204	2.03	0.247902	0.27231
205	2.04	0.261565		205	2.04	0.249087	0.274044
206	2.05	0.263028		206	2.05	0.250291	0.275764
207	2.06	0.264506		207	2.06	0.251509	0.277503
208	2.07	0.266029		208	2.07	0.252745	0.279314
209	2.08	0.267569		209	2.08	0.253981	0.281157
210	2.09	0.269156		210	2.09	0.255268	0.283043
211	2.1	0.270746		211	2.1	0.256555	0.284937
212	2.11	0.272402		212	2.11	0.2579	0.286904
213	2.12	0.274042		213	2.12	0.259247	0.288837
214	2.13	0.275725		214	2.13	0.260615	0.290834
215	2.14	0.277442		215	2.14	0.262013	0.292871
216	2.15	0.278937		216	2.15	0.263277	0.294597
217	2.16	0.280465		217	2.16	0.264549	0.296382
218	2.17	0.281962		218	2.17	0.265803	0.298121
219	2.18	0.283484		219	2.18	0.267089	0.299879
220	2.19	0.285044		220	2.19	0.268407	0.301682
221	2.2	0.28658		221	2.2	0.269705	0.303456
222	2.21	0.288011		222	2.21	0.270937	0.305084
223	2.22	0.289506		223	2.22	0.272233	0.306778
224	2.23	0.291023		224	2.23	0.273549	0.308498
225	2.24	0.292547		225	2.24	0.274869	0.310226
226	2.25	0.29407		226	2.25	0.276182	0.311958
227	2.26	0.295629		227	2.26	0.277532	0.313726
228	2.27	0.297191		228	2.27	0.27888	0.315501
229	2.28	0.298805		229	2.28	0.280271	0.31734
230	2.29	0.300459		230	2.29	0.281689	0.319229
231	2.3	0.302156		231	2.3	0.28314	0.321172
232	2.31	0.303902		232	2.31	0.284629	0.323176
233	2.32	0.305668		233	2.32	0.286128	0.325209
234	2.33	0.307404		234	2.33	0.287591	0.327217
235	2.34	0.309175		235	2.34	0.289087	0.329263
236	2.35	0.310952		236	2.35	0.29059	0.331314
237	2.36	0.312727		237	2.36	0.292081	0.333374
238	2.37	0.31455		238	2.37	0.293621	0.33548
239	2.38	0.316414		239	2.38	0.295197	0.337632
240	2.39	0.318261		240	2.39	0.29678	0.339742
241	2.4	0.320029		241	2.4	0.298305	0.341753
242	2.41	0.321839		242	2.41	0.299873	0.343805
243	2.42	0.323715		243	2.42	0.301498	0.345933
244	2.43	0.325581		244	2.43	0.303112	0.348051
245	2.44	0.327503		245	2.44	0.304784	0.350222
246	2.45	0.329457		246	2.45	0.306484	0.35243
247	2.46	0.33149		247	2.46	0.308262	0.354719
248	2.47	0.333563		248	2.47	0.310075	0.357051
249	2.48	0.335695		249	2.48	0.311944	0.359445
250	2.49	0.337844		250	2.49	0.313834	0.361855
251	2.5	0.340096		251	2.5	0.315824	0.364369
252	2.51	0.342348		252	2.51	0.317805	0.366891
253	2.52	0.34466		253	2.52	0.319841	0.369479
254	2.53	0.346954		254	2.53	0.321852	0.372056
255	2.54	0.349243		255	2.54	0.32385	0.374637
256	2.55	0.351584		256	2.55	0.325903	0.377265
257	2.56	0.353967		257	2.56	0.328003	0.379931
258	2.57	0.356394		258	2.57	0.330149	0.382639
259	2.58	0.358813		259	2.58	0.332288	0.385337
260	2.59	0.361206		260	2.59	0.3344	0.388011
261	2.6	0.363571		261	2.6	0.336481	0.39066
262	2.61	0.365946		262	2.61	0.338569	0.393322
263	2.62	0.368379		263	2.62	0.340719	0.396039
264	2.63	0.370876		264	2.63	0.342933	0.398818
265	2.64	0.373321		265	2.64	0.345089	0.401552
266	2.65	0.375711		266	2.65	0.347205	0.404217
267	2.66	0.378165		267	2.66	0.349392	0.406938
268	2.67	0.380655		268	2.67	0.351606	0.409704
269	2.68	0.383159		269	2.68	0.353834	0.412484
270	2.69	0.385613		270	2.69	0.356009	0.415217
271	2.7	0.388046		271	2.7	0.358158	0.417934
272	2.71	0.390499		272	2.71	0.360335	0.420662
273	2.72	0.393051		273	2.72	0.362613	0.423489
274	2.73	0.395585		274	2.73	0.364864	0.426305
275	2.74	0.398131		275	2.74	0.367131	0.42913
276	2.75	0.400671		276	2.75	0.369392	0.43195
277	2.76	0.403248		277	2.76	0.371699	0.434797
278	2.77	0.405849		278	2.77	0.374032	0.437666
279	2.78	0.408496		279	2.78	0.376416	0.440575
280	2.79	0.411118		280	2.79	0.378769	0.443466
281	2.8	0.413733		281	2.8	0.381114	0.446351
282	2.81	0.416335		282	2.81	0.383448	0.449222
283	2.82	0.41898		283	2.82	0.385825	0.452135
284	2.83	0.421712		284	2.83	0.388302	0.455121
285	2.84	0.424453		285	2.84	0.390786	0.45812
286	2.85	0.42718		286	2.85	0.393261	0.461099
287	2.86	0.429915		287	2.86	0.395744	0.464087
288	2.87	0.432674		288	2.87	0.398246	0.467102
289	2.88	0.435442		289	2.88	0.400759	0.470125
290	2.89	0.438224		290	2.89	0.403285	0.473162
291	2.9	0.440992		291	2.9	0.405796	0.476188
292	2.91	0.443713		292	2.91	0.40825	0.479175
293	2.92	0.446447		293	2.92	0.410713	0.482181
294	2.93	0.449191		294	2.93	0.413184	0.485198
295	2.94	0.45199		295	2.94	0.415713	0.488267
296	2.95	0.454771		296	2.95	0.418222	0.491321
297	2.96	0.457562		297	2.96	0.420745	0.49438
298	2.97	0.460361		298	2.97	0.423282	0.49744
299	2.98	0.463159		299	2.98	0.425818	0.5005
300	2.99	0.465884		300	2.99	0.428289	0.503479
301	3	0.468621		301	3	0.430771	0.50647
302	3.01	0.471345		302	3.01	0.43324	0.509451
303	3.02	0.474085		303	3.02	0.435727	0.512443
304	3.03	0.476809		304	3.03	0.438194	0.515424
305	3.04	0.479544		305	3.04	0.440676	0.518412
306	3.05	0.482247		306	3.05	0.443117	0.521377
307	3.06	0.484988		307	3.06	0.445604	0.524373
308	3.07	0.487735		308	3.07	0.448096	0.527374
309	3.08	0.49051		309	3.08	0.450622	0.530397
310	3.09	0.493246		310	3.09	0.453107	0.533386
311	3.1	0.495994		311	3.1	0.4556	0.536388
312	3.11	0.498737		312	3.11	0.458091	0.539384
313	3.12	0.501464		313	3.12	0.460575	0.542352
314	3.13	0.504144		314	3.13	0.463014	0.545273
315	3.14	0.506762		315	3.14	0.465385	0.548138
316	3.15	0.50934		316	3.15	0.467713	0.550968
317	3.16	0.511914		317	3.16	0.470035	0.553794
318	3.17	0.514487		318	3.17	0.472358	0.556617
319	3.18	0.517097		319	3.18	0.474725	0.55947
320	3.19	0.519715		320	3.19	0.477103	0.562328
321	3.2	0.522351		321	3.2	0.479504	0.565197
322	3.21	0.525023		322	3.21	0.481947	0.568099
323	3.22	0.527672		323	3.22	0.484368	0.570975
324	3.23	0.530347		324	3.23	0.486818	0.573875
325	3.24	0.533009		325	3.24	0.489256	0.576761
326	3.25	0.535687		326	3.25	0.491717	0.579657
327	3.26	0.538323		327	3.26	0.494144	0.582502
328	3.27	0.540918		328	3.27	0.496533	0.585304
329	3.28	0.543544		329	3.28	0.498959	0.58813
330	3.29	0.546183		330	3.29	0.501399	0.590967
331	3.3	0.548799		331	3.3	0.503818	0.59378
332	3.31	0.551427		332	3.31	0.50625	0.596603
333	3.32	0.554075		333	3.32	0.508702	0.599449
334	3.33	0.556716		334	3.33	0.511147	0.602285
335	3.34	0.559361		335	3.34	0.513595	0.605128
336	3.35	0.562018		336	3.35	0.516057	0.607979
337	3.36	0.564674		337	3.36	0.518516	0.610832
338	3.37	0.567275		338	3.37	0.520913	0.613637
339	3.38	0.569884		339	3.38	0.523323	0.616446
340	3.39	0.572437		340	3.39	0.52567	0.619203
341	3.4	0.574959		341	3.4	0.527989	0.621929
342	3.41	0.577489		342	3.41	0.530318	0.624659
343	3.42	0.580025		343	3.42	0.532658	0.627392
344	3.43	0.582564		344	3.43	0.535006	0.630121
345	3.44	0.585109		345	3.44	0.53737	0.632849
346	3.45	0.587653		346	3.45	0.539736	0.635569
347	3.46	0.590187		347	3.46	0.54209	0.638284
348	3.47	0.592723		348	3.47	0.544444	0.641003
349	3.48	0.595209		349	3.48	0.54675	0.643669
350	3.49	0.597673		350	3.49	0.549024	0.646323
351	3.5	0.600109		351	3.5	0.551272	0.648945
352	3.51	0.602552		352	3.51	0.553533	0.651572
353	3.52	0.604974		353	3.52	0.555778	0.654171
354	3.53	0.607393		354	3.53	0.558023	0.656763
355	3.54	0.60978		355	3.54	0.560238	0.659321
356	3.55	0.612096		356	3.55	0.562387	0.661805
357	3.56	0.614428		357	3.56	0.564555	0.664301
358	3.57	0.616717		358	3.57	0.566678	0.666756
359	3.58	0.618982		359	3.58	0.56878	0.669184
360	3.59	0.621231		360	3.59	0.570878	0.671584
361	3.6	0.623492		361	3.6	0.572987	0.673998
362	3.61	0.625769		362	3.61	0.575118	0.676419
363	3.62	0.628008		363	3.62	0.577214	0.678801
364	3.63	0.630219		364	3.63	0.579287	0.681152
365	3.64	0.632416		365	3.64	0.581347	0.683485
366	3.65	0.634591		366	3.65	0.583387	0.685796
367	3.66	0.636759		367	3.66	0.58542	0.688098
368	3.67	0.638905		368	3.67	0.587427	0.690383
369	3.68	0.641052		369	3.68	0.589443	0.692661
370	3.69	0.643213		370	3.69	0.591476	0.69495
371	3.7	0.645371		371	3.7	0.593512	0.697229
372	3.71	0.647544		372	3.71	0.59557	0.699519
373	3.72	0.649705		373	3.72	0.597622	0.701788
374	3.73	0.651894		374	3.73	0.599703	0.704086
375	3.74	0.654083		375	3.74	0.601789	0.706377
376	3.75	0.656232		376	3.75	0.603822	0.708642
377	3.76	0.658353		377	3.76	0.605812	0.710894
378	3.77	0.660431		378	3.77	0.607765	0.713098
379	3.78	0.66248		379	3.78	0.609688	0.715271
380	3.79	0.664529		380	3.79	0.611622	0.717436
381	3.8	0.666592		381	3.8	0.613578	0.719606
382	3.81	0.668619		382	3.81	0.61551	0.721729
383	3.82	0.670653		383	3.82	0.617449	0.723857
384	3.83	0.672679		384	3.83	0.619384	0.725973
385	3.84	0.674698		385	3.84	0.621324	0.728072
386	3.85	0.676714		386	3.85	0.623265	0.730163
387	3.86	0.67873		387	3.86	0.62521	0.732249
388	3.87	0.680744		388	3.87	0.627153	0.734336
389	3.88	0.682729		389	3.88	0.629064	0.736395
390	3.89	0.684709		390	3.89	0.630972	0.738445
391	3.9	0.686653		391	3.9	0.632829	0.740478
392	3.91	0.68858		392	3.91	0.634674	0.742486
393	3.92	0.690522		393	3.92	0.636541	0.744503
394	3.93	0.692469		394	3.93	0.638416	0.746522
395	3.94	0.694411		395	3.94	0.640278	0.748545
396	3.95	0.696363		396	3.95	0.642155	0.750571
397	3.96	0.698296		397	3.96	0.644015	0.752578
398	3.97	0.700212		398	3.97	0.645855	0.754569
399	3.98	0.702123		399	3.98	0.647697	0.756548
400	3.99	0.704025		400	3.99	0.649532	0.758518
401	4	0.705901		401	4	0.651339	0.760463
402	4.01	0.707787		402	4.01	0.653157	0.762417
403	4.02	0.709596		403	4.02	0.654896	0.764295
404	4.03	0.711376		404	4.03	0.65662	0.766132
405	4.04	0.713132		405	4.04	0.658322	0.767941
406	4.05	0.714856		406	4.05	0.660003	0.769709
407	4.06	0.716577		407	4.06	0.661691	0.771463
408	4.07	0.718291		408	4.07	0.663377	0.773205
409	4.08	0.720016		409	4.08	0.66507	0.774962
410	4.09	0.721742		410	4.09	0.666766	0.776718
411	4.1	0.723474		411	4.1	0.668469	0.77848
412	4.11	0.725234		412	4.11	0.670206	0.780262
413	4.12	0.726971		413	4.12	0.671926	0.782016
414	4.13	0.728723		414	4.13	0.673671	0.783775
415	4.14	0.730434		415	4.14	0.675371	0.785497
416	4.15	0.732144		416	4.15	0.677073	0.787214
417	4.16	0.733852		417	4.16	0.678781	0.788922
418	4.17	0.735571		418	4.17	0.680502	0.790639
419	4.18	0.73727		419	4.18	0.682203	0.792338
420	4.19	0.738913		420	4.19	0.683855	0.793972
421	4.2	0.740525		421	4.2	0.685481	0.795569
422	4.21	0.742118		422	4.21	0.687087	0.79715
423	4.22	0.743674		423	4.22	0.688659	0.798689
424	4.23	0.745191		424	4.23	0.69019	0.800192
425	4.24	0.746699		425	4.24	0.691721	0.801677
426	4.25	0.748218		426	4.25	0.693268	0.803168
427	4.26	0.749744		427	4.26	0.694825	0.804663
428	4.27	0.751247		428	4.27	0.696361	0.806133
429	4.28	0.752753		429	4.28	0.697903	0.807604
430	4.29	0.754268		430	4.29	0.699449	0.809088
431	4.3	0.75577		431	4.3	0.70098	0.810559
432	4.31	0.757233		432	4.31	0.702459	0.812007
433	4.32	0.758652		433	4.32	0.703876	0.813427
434	4.33	0.760093		434	4.33	0.705317	0.814869
435	4.34	0.761543		435	4.34	0.706768	0.816317
436	4.35	0.762962		436	4.35	0.708189	0.817734
437	4.36	0.764378		437	4.36	0.709614	0.819142
438	4.37	0.765813		438	4.37	0.711058	0.820568
439	4.38	0.767226		439	4.38	0.712486	0.821965
440	4.39	0.768652		440	4.39	0.713933	0.823371
441	4.4	0.770078		441	4.4	0.715381	0.824775
442	4.41	0.771497		442	4.41	0.716828	0.826166
443	4.42	0.772926		443	4.42	0.718288	0.827563
444	4.43	0.774325		444	4.43	0.719732	0.828919
445	4.44	0.775722		445	4.44	0.721177	0.830267
446	4.45	0.777063		446	4.45	0.722569	0.831557
447	4.46	0.778412		447	4.46	0.723977	0.832848
448	4.47	0.779747		448	4.47	0.725375	0.834119
449	4.48	0.781064		449	4.48	0.72675	0.835379
450	4.49	0.782362		450	4.49	0.728101	0.836623
451	4.5	0.783657		451	4.5	0.729454	0.837861
452	4.51	0.784966		452	4.51	0.730819	0.839113
453	4.52	0.78625		453	4.52	0.732165	0.840336
454	4.53	0.787501		454	4.53	0.733463	0.84154
455	4.54	0.788753		455	4.54	0.734761	0.842745
456	4.55	0.789995		456	4.55	0.736048	0.843943
457	4.56	0.791182		457	4.56	0.737283	0.84508
458	4.57	0.792378		458	4.57	0.738534	0.846221
459	4.58	0.793572		459	4.58	0.739788	0.847356
460	4.59	0.794803		460	4.59	0.741084	0.848522
461	4.6	0.796027		461	4.6	0.742376	0.849678
462	4.61	0.797245		462	4.61	0.74366	0.850829
463	4.62	0.798457		463	4.62	0.744942	0.851972
464	4.63	0.799662		464	4.63	0.746217	0.853107
465	4.64	0.800891		465	4.64	0.747519	0.854263
466	4.65	0.802129		466	4.65	0.748834	0.855425
467	4.66	0.803377		467	4.66	0.750166	0.856588
468	4.67	0.804626		468	4.67	0.751498	0.857753
469	4.68	0.805865		469	4.68	0.752821	0.858909
470	4.69	0.80711		470	4.69	0.754151	0.860069
471	4.7	0.808342		471	4.7	0.755468	0.861216
472	4.71	0.809531		472	4.71	0.756731	0.862332
473	4.72	0.81068		473	4.72	0.75794	0.863419
474	4.73	0.811832		474	4.73	0.759155	0.864508
475	4.74	0.813003		475	4.74	0.760396	0.865611
476	4.75	0.814171		476	4.75	0.761634	0.866709
477	4.76	0.81534		477	4.76	0.762872	0.867808
478	4.77	0.816502		478	4.77	0.764105	0.868899
479	4.78	0.817659		479	4.78	0.765338	0.86998
480	4.79	0.818797		480	4.79	0.766553	0.871042
481	4.8	0.819936		481	4.8	0.767773	0.872099
482	4.81	0.821087		482	4.81	0.769003	0.873171
483	4.82	0.822239		483	4.82	0.770239	0.874239
484	4.83	0.823347		484	4.83	0.771437	0.875256
485	4.84	0.824467		485	4.84	0.772655	0.876279
486	4.85	0.825593		486	4.85	0.773886	0.877301
487	4.86	0.826706		487	4.86	0.775097	0.878316
488	4.87	0.82781		488	4.87	0.776307	0.879312
489	4.88	0.828911		489	4.88	0.777519	0.880302
490	4.89	0.830022		490	4.89	0.77874	0.881304
491	4.9	0.831087		491	4.9	0.779903	0.88227
492	4.91	0.832154		492	4.91	0.781074	0.883234
493	4.92	0.833244		493	4.92	0.782274	0.884214
494	4.93	0.834359		494	4.93	0.783504	0.885215
495	4.94	0.835489		495	4.94	0.784759	0.886219
496	4.95	0.836578		496	4.95	0.785983	0.887174
497	4.96	0.837657		497	4.96	0.7872	0.888114
498	4.97	0.838722		498	4.97	0.788399	0.889046
499	4.98	0.839778		499	4.98	0.789592	0.889964
500	4.99	0.840824		500	4.99	0.790792	0.890856
501	5	0.841873		501	5	0.792004	0.891742
502	5.01	0.842933		502	5.01	0.793235	0.892631
503	5.02	0.843969		503	5.02	0.794434	0.893504
504	5.03	0.84502		504	5.03	0.795656	0.894383
505	5.04	0.846081		505	5.04	0.796891	0.895271
506	5.05	0.847107		506	5.05	0.798078	0.896136
507	5.06	0.848094		507	5.06	0.799226	0.896963
508	5.07	0.849099		508	5.07	0.800401	0.897797
509	5.08	0.850116		509	5.08	0.8016	0.898633
510	5.09	0.851113		510	5.09	0.802772	0.899454
511	5.1	0.852084		511	5.1	0.803914	0.900254
512	5.11	0.85308		512	5.11	0.805086	0.901074
513	5.12	0.854119		513	5.12	0.806312	0.901926
514	5.13	0.855147		514	5.13	0.807519	0.902776
515	5.14	0.856191		515	5.14	0.808744	0.903639
516	5.15	0.857233		516	5.15	0.80997	0.904497
517	5.16	0.858283		517	5.16	0.811216	0.90535
518	5.17	0.859358		518	5.17	0.812494	0.906223
519	5.18	0.86043		519	5.18	0.813787	0.907072
520	5.19	0.861525		520	5.19	0.815113	0.907937
521	5.2	0.86262		521	5.2	0.816439	0.908801
522	5.21	0.863702		522	5.21	0.817752	0.909651
523	5.22	0.864755		523	5.22	0.81902	0.910491
524	5.23	0.8658		524	5.23	0.820284	0.911315
525	5.24	0.866824		525	5.24	0.821515	0.912132
526	5.25	0.867816		526	5.25	0.822721	0.912911
527	5.26	0.868752		527	5.26	0.823853	0.91365
528	5.27	0.869679		528	5.27	0.824975	0.914383
529	5.28	0.870607		529	5.28	0.826119	0.915095
530	5.29	0.871517		530	5.29	0.827243	0.915791
531	5.3	0.872418		531	5.3	0.828359	0.916477
532	5.31	0.873309		532	5.31	0.829462	0.917155
533	5.32	0.874132		533	5.32	0.830481	0.917783
534	5.33	0.874948		534	5.33	0.831489	0.918406
535	5.34	0.875776		535	5.34	0.832516	0.919036
536	5.35	0.876629		536	5.35	0.833578	0.919681
537	5.36	0.877494		537	5.36	0.83465	0.920339
538	5.37	0.878363		538	5.37	0.835735	0.920991
539	5.38	0.879222		539	5.38	0.836824	0.92162
540	5.39	0.88008		540	5.39	0.837906	0.922254
541	5.4	0.880962		541	5.4	0.839025	0.922898
542	5.41	0.881856		542	5.41	0.840168	0.923543
543	5.42	0.882747		543	5.42	0.841306	0.924188
544	5.43	0.883643		544	5.43	0.84245	0.924836
545	5.44	0.884558		545	5.44	0.843614	0.925503
546	5.45	0.885447		546	5.45	0.844743	0.926152
547	5.46	0.886341		547	5.46	0.845876	0.926806
548	5.47	0.887226		548	5.47	0.847004	0.927448
549	5.48	0.888086		549	5.48	0.848101	0.928071
550	5.49	0.888938		550	5.49	0.849195	0.928681
551	5.5	0.889814		551	5.5	0.850327	0.929301
552	5.51	0.890678		552	5.51	0.851452	0.929905
553	5.52	0.891504		553	5.52	0.852529	0.930479
554	5.53	0.892335		554	5.53	0.853612	0.931059
555	5.54	0.893133		555	5.54	0.854656	0.93161
556	5.55	0.893953		556	5.55	0.855729	0.932176
557	5.56	0.894771		557	5.56	0.856795	0.932747
558	5.57	0.895611		558	5.57	0.857887	0.933336
559	5.58	0.896468		559	5.58	0.859008	0.933929
560	5.59	0.897327		560	5.59	0.860143	0.934511
561	5.6	0.898184		561	5.6	0.861279	0.935088
562	5.61	0.899025		562	5.61	0.862406	0.935643
563	5.62	0.899867		563	5.62	0.863532	0.936203
564	5.63	0.900684		564	5.63	0.864615	0.936754
565	5.64	0.901522		565	5.64	0.86572	0.937324
566	5.65	0.902322		566	5.65	0.866782	0.937862
567	5.66	0.903092		567	5.66	0.867799	0.938384
568	5.67	0.903872		568	5.67	0.868836	0.938909
569	5.68	0.904656		569	5.68	0.869886	0.939426
570	5.69	0.905457		570	5.69	0.870954	0.939959
571	5.7	0.906271		571	5.7	0.87204	0.940502
572	5.71	0.907062		572	5.71	0.873099	0.941025
573	5.72	0.907815		573	5.72	0.874105	0.941526
574	5.73	0.90859		574	5.73	0.87514	0.94204
575	5.74	0.909397		575	5.74	0.876214	0.942579
576	5.75	0.910168		576	5.75	0.87724	0.943095
577	5.76	0.910925		577	5.76	0.878241	0.943609
578	5.77	0.91169		578	5.77	0.879258	0.944122
579	5.78	0.912478		579	5.78	0.880301	0.944656
580	5.79	0.913236		580	5.79	0.881304	0.945169
581	5.8	0.913981		581	5.8	0.8823	0.945663
582	5.81	0.914723		582	5.81	0.883297	0.946149
583	5.82	0.915462		583	5.82	0.88429	0.946634
584	5.83	0.916197		584	5.83	0.885279	0.947115
585	5.84	0.916914		585	5.84	0.886242	0.947585
586	5.85	0.917643		586	5.85	0.887228	0.948059
587	5.86	0.918363		587	5.86	0.8882	0.948525
588	5.87	0.91909		588	5.87	0.889187	0.948993
589	5.88	0.919781		589	5.88	0.890116	0.949445
590	5.89	0.920508		590	5.89	0.891093	0.949923
591	5.9	0.921236		591	5.9	0.892068	0.950403
592	5.91	0.921939		592	5.91	0.893013	0.950866
593	5.92	0.922634		593	5.92	0.893952	0.951317
594	5.93	0.923318		594	5.93	0.894874	0.951763
595	5.94	0.924007		595	5.94	0.895791	0.952222
596	5.95	0.924656		596	5.95	0.896655	0.952658
597	5.96	0.925324		597	5.96	0.897543	0.953105
598	5.97	0.925988		598	5.97	0.898427	0.95355
599	5.98	0.926636		599	5.98	0.899282	0.95399
600	5.99	0.927226		600	5.99	0.900053	0.954398
601	6	0.92782		601	6	0.900832	0.954809
602	6.01	0.928408		602	6.01	0.901605	0.95521
603	6.02	0.928978		603	6.02	0.902355	0.9556
604	6.03	0.929551		604	6.03	0.903109	0.955994
605	6.04	0.930136		605	6.04	0.903882	0.95639
606	6.05	0.930725		606	6.05	0.904657	0.956792
607	6.06	0.931291		607	6.06	0.905396	0.957186
608	6.07	0.931832		608	6.07	0.906102	0.957563
609	6.08	0.932347		609	6.08	0.906784	0.95791
610	6.09	0.932841		610	6.09	0.907433	0.958248
611	6.1	0.933364		611	6.1	0.908124	0.958604
612	6.11	0.933903		612	6.11	0.908835	0.958972
613	6.12	0.934449		613	6.12	0.909567	0.959331
614	6.13	0.935002		614	6.13	0.910305	0.959699
615	6.14	0.935571		615	6.14	0.911062	0.960079
616	6.15	0.936119		616	6.15	0.911796	0.960442
617	6.16	0.936692		617	6.16	0.912562	0.960822
618	6.17	0.937261		618	6.17	0.913319	0.961202
619	6.18	0.937817		619	6.18	0.914056	0.961578
620	6.19	0.938361		620	6.19	0.914783	0.961938
621	6.2	0.938916		621	6.2	0.915524	0.962309
622	6.21	0.939494		622	6.21	0.91629	0.962698
623	6.22	0.940065		623	6.22	0.917051	0.96308
624	6.23	0.94063		624	6.23	0.917799	0.963461
625	6.24	0.941187		625	6.24	0.918541	0.963833
626	6.25	0.941735		626	6.25	0.919267	0.964203
627	6.26	0.942304		627	6.26	0.920018	0.96459
628	6.27	0.94288		628	6.27	0.920779	0.96498
629	6.28	0.943433		629	6.28	0.921507	0.965359
630	6.29	0.943958		630	6.29	0.922202	0.965714
631	6.3	0.944461		631	6.3	0.922869	0.966052
632	6.31	0.944937		632	6.31	0.923503	0.966372
633	6.32	0.945426		633	6.32	0.924148	0.966704
634	6.33	0.945922		634	6.33	0.924798	0.967046
635	6.34	0.946428		635	6.34	0.925458	0.967398
636	6.35	0.946911		636	6.35	0.926081	0.967741
637	6.36	0.947401		637	6.36	0.926718	0.968084
638	6.37	0.947889		638	6.37	0.927357	0.968421
639	6.38	0.948395		639	6.38	0.928019	0.968771
640	6.39	0.948922		640	6.39	0.928712	0.969132
641	6.4	0.949464		641	6.4	0.929424	0.969504
642	6.41	0.949971		642	6.41	0.930091	0.96985
643	6.42	0.950444		643	6.42	0.930714	0.970174
644	6.43	0.950927		644	6.43	0.931344	0.97051
645	6.44	0.951386		645	6.44	0.931947	0.970824
646	6.45	0.951836		646	6.45	0.932539	0.971134
647	6.46	0.952269		647	6.46	0.933106	0.971432
648	6.47	0.952687		648	6.47	0.933662	0.971712
649	6.48	0.953118		649	6.48	0.934232	0.972004
650	6.49	0.953578		650	6.49	0.934834	0.972323
651	6.5	0.95405		651	6.5	0.935456	0.972644
652	6.51	0.954521		652	6.51	0.936075	0.972967
653	6.52	0.954958		653	6.52	0.936649	0.973268
654	6.53	0.955417		654	6.53	0.937244	0.973589
655	6.54	0.955833		655	6.54	0.937801	0.973866
656	6.55	0.956234		656	6.55	0.93834	0.974128
657	6.56	0.956602		657	6.56	0.938855	0.974349
658	6.57	0.956945		658	6.57	0.939335	0.974555
659	6.58	0.957266		659	6.58	0.93979	0.974743
660	6.59	0.957558		660	6.59	0.940203	0.974913
661	6.6	0.957849		661	6.6	0.940613	0.975085
662	6.61	0.958151		662	6.61	0.941035	0.975267
663	6.62	0.958469		663	6.62	0.941476	0.975461
664	6.63	0.958781		664	6.63	0.941904	0.975658
665	6.64	0.959095		665	6.64	0.942335	0.975855
666	6.65	0.959418		666	6.65	0.942775	0.976061
667	6.66	0.959731		667	6.66	0.943206	0.976256
668	6.67	0.960028		668	6.67	0.943628	0.976427
669	6.68	0.96032		669	6.68	0.944041	0.976598
670	6.69	0.960609		670	6.69	0.944451	0.976767
671	6.7	0.960912		671	6.7	0.944872	0.976952
672	6.71	0.9612		672	6.71	0.945269	0.977131
673	6.72	0.961463		673	6.72	0.945638	0.977288
674	6.73	0.961749		674	6.73	0.946034	0.977463
675	6.74	0.96202		675	6.74	0.946417	0.977622
676	6.75	0.962296		676	6.75	0.946804	0.977788
677	6.76	0.962603		677	6.76	0.947228	0.977978
678	6.77	0.962889		678	6.77	0.947624	0.978153
679	6.78	0.963189		679	6.78	0.948037	0.97834
680	6.79	0.96349		680	6.79	0.948456	0.978525
681	6.8	0.963795		681	6.8	0.94888	0.97871
682	6.81	0.964086		682	6.81	0.94929	0.978882
683	6.82	0.964382		683	6.82	0.949705	0.979059
684	6.83	0.964681		684	6.83	0.950126	0.979236
685	6.84	0.96497		685	6.84	0.950533	0.979408
686	6.85	0.965264		686	6.85	0.950947	0.979581
687	6.86	0.96557		687	6.86	0.951379	0.979761
688	6.87	0.965884		688	6.87	0.951823	0.979944
689	6.88	0.966172		689	6.88	0.952236	0.980108
690	6.89	0.966478		690	6.89	0.95267	0.980285
691	6.9	0.966768		691	6.9	0.953084	0.980453
692	6.91	0.967074		692	6.91	0.953513	0.980635
693	6.92	0.96739		693	6.92	0.953952	0.980829
694	6.93	0.967726		694	6.93	0.954413	0.981038
695	6.94	0.968034		695	6.94	0.954839	0.981228
696	6.95	0.968357		696	6.95	0.955281	0.981433
697	6.96	0.968654		697	6.96	0.955699	0.98161
698	6.97	0.968957		698	6.97	0.956128	0.981786
699	6.98	0.969259		699	6.98	0.956563	0.981955
700	6.99	0.969573		700	6.99	0.95701	0.982137
701	7	0.969875		701	7	0.957438	0.982312
