# Supplementary material for: A coupled mechano-biochemical model for cell polarity guided anisotropic root growth
Source: eLife. 2021 Nov 1;10:e72132. doi: 10.7554/eLife.72132 (PMC8716106; doi:10.7554/eLife.72132)
Supplement: Figure 2—source data 1. [file elife-72132-fig2-data1.xlsx]

## Sheet: Figure 2H
Relative position along the axis	Growth Rate (1/h)
0	0.0133305
0.0126582	0.0118023
0.0253165	0.0128704
0.0379747	0.0159991
0.0506329	0.0206527
0.0632911	0.0262957
0.0759494	0.032369
0.0886076	0.0378978
0.101266	0.0415495
0.113924	0.0424144
0.126582	0.0419706
0.139241	0.0422393
0.151899	0.0431458
0.164557	0.0436666
0.177215	0.0434804
0.189873	0.0431096
0.202532	0.0427517
0.21519	0.0419319
0.227848	0.0403518
0.240506	0.0385026
0.253165	0.0369095
0.265823	0.0356364
0.278481	0.0346206
0.291139	0.0337259
0.303797	0.0327728
0.316456	0.0314624
0.329114	0.0295637
0.341772	0.0273542
0.35443	0.0251883
0.367089	0.0230685
0.379747	0.0210011
0.392405	0.0193643
0.405063	0.0182229
0.417722	0.0167254
0.43038	0.0146527
0.443038	0.0130037
0.455696	0.0121046
0.468354	0.0114203
0.481013	0.0105423
0.493671	0.0092427
0.506329	0.00779588
0.518987	0.00670106
0.531646	0.00594476
0.544304	0.00529719
0.556962	0.00475853
0.56962	0.00440138
0.582278	0.00411205
0.594937	0.00374067
0.607595	0.00350331
0.620253	0.00379546
0.632911	0.00457435
0.64557	0.00534799
0.658228	0.00572931
0.670886	0.00578586
0.683544	0.00568764
0.696203	0.00553858
0.708861	0.00532371
0.721519	0.00501576
0.734177	0.00460729
0.746835	0.00413119
0.759494	0.00362528
0.772152	0.00312658
0.78481	0.00265788
0.797468	0.00222945
0.810127	0.00185115
0.822785	0.00153282
0.835443	0.00128319
0.848101	0.00109858
0.860759	0.000967829
0.873418	0.000879652
0.886076	0.000822767
0.898734	0.000785895
0.911392	0.000757753
0.924051	0.00072706
0.936709	0.000682536
0.949367	0.000612899
0.962025	0.000506867
0.974684	0.00035316
0.987342	0.000140497
1	-0.000142404

## Sheet: Figure 2I
Relative position along the axis of division event
0.169589
0.169654
0.169727
0.16981
0.169903
0.170007
0.170125
0.170256
0.170399
0.170548
0.170699
0.17085
0.171003
0.17116
0.171329
0.171514
0.171711
0.171915
0.172122
0.172331
0.172542
0.172755
0.172973
0.173196
0.173422
0.173649
0.173869
0.174088
0.174309
0.17453
0.174752
0.174971
0.17519
0.175411
0.175637
0.175868
0.176106
0.176354
0.176613
0.176884
0.177166
0.177458
0.17776
0.178071
0.178392
0.178722
0.179063
0.179416
0.179781
0.180158
0.180548
0.18095
0.181362
0.181783
0.182213
0.18265
0.183094
0.183541
0.183991
0.184443
0.184896
0.185347
0.185797
0.186243
0.186687
0.187131
0.187575
0.188015
0.18845
0.18888
0.189305
0.189726
0.190143
0.106837
0.0557451
0.219373
0.210361
0.109485
0.154849
0.224587
0.214664
0.110895
0.185651
0.111284
0.210109
0.196097
0.166108
0.197229
0.181096
0.173443
0.10778
0.17124
0.161225
0.0829195
0.225114
0.236136
0.0390195
0.0360348
0.157192
0.0998384
0.0398315
0.156073
0.222391
0.141686
0.165117
0.121113
0.108148
0.0643549
0.207209
0.0426974
0.109515
0.242903
0.266725
0.15478
0.295592
0.3105
0.211757
0.148759
0.0486111
0.154369
0.317993
0.326913
0.0863639
0.315889
0.0814458
0.246914
0.238571
0.343386
0.241453
0.182592
0.307912
0.105464
0.248161
0.343739
0.20626
0.339605
0.172021
0.283662
0.164386
0.114719
0.345146
0.107198
0.165883
0.344322
0.276445
0.310598
0.322746
0.285759
0.289684
0.320778
0.26678
0.353722
0.267572
0.285767
0.272649
0.214985
0.261686
0.112948
0.122598
0.328093
0.255952
0.236387
0.137124
0.244653
0.0799019
0.045909
0.219311
0.204709
0.337515
0.252509
0.103432
0.134915
0.243226
0.291585
0.202905
0.169048
0.201819
0.210972
0.367402
0.327495
0.331684
0.291613
0.264828
0.112653
0.178791
0.149071
0.228744
0.199734
0.406787
0.363077
0.141255
0.245586
0.172064
0.186841
0.101805
0.107575
0.195772
0.310339
0.274976
0.191011
0.270888
0.412513
0.226582
0.138735
0.21251
0.0380858
0.135913
0.0769807
0.108733
0.346876
0.360594
0.458813
0.354877
0.417713
0.444999
0.198432
0.310848
0.413255
0.216894
0.369686
0.341773
0.254246
0.268898
0.288672
0.312081
0.264803
0.397984
0.223149
0.47745
0.379737
0.352911
0.450876
0.447163
0.48614
0.485026
0.310398
0.497478
0.29996
0.321014
0.231195
0.352388
0.285453
0.390314
0.395423
0.22019
0.19029
0.431685
0.41625
0.0556702
0.112729
0.48031
0.169778
0.115152
0.450829
0.418544
0.14455
0.183556
0.195415
0.400636
0.153936
0.49492
0.367716
0.389855
0.0186466
0.322087
0.0608154
0.487552
0.265101
0.175595
0.435658
0.297651
0.347998
0.496261
0.46099
0.473785
0.436448
0.15895
0.368683
0.403525
0.410207
0.265435
0.455176
0.340397
0.120253
0.117085
0.224688
0.521671
0.241727
0.493609
0.0969956
0.134848
0.299349
0.290061
0.175047
0.120925
0.274443
0.206766
0.233608
0.191113
0.166533
0.118971
0.233978
0.259965
0.0729447
0.367451
0.0276296
0.286552
0.30672
0.237915
0.341291
0.164616
0.0848329
0.371197
0.435171
0.213258
0.0871819
0.206455
0.103733
0.118774
0.217511
0.152604
0.390041
0.188655
0.117059
0.267434
0.340104
0.0329982
0.0579979
0.216042
0.353987
0.408435
0.320678
0.29264
0.649209
0.164992
0.49744
0.668803
0.0397469
0.185399
0.508993
0.111361
0.0426757
0.462645
0.405415
0.517852
0.372666
0.340442
0.131787
0.0413759
0.166049
0.153823
0.335796
0.397217
0.0521066
0.236343
0.291715
0.195883
0.206311
0.240069
0.24758
0.334126
0.203044
0.1761
0.336847
0.247669
0.288425
0.429209
0.286092
0.327146
0.153223
0.0855888
0.154704
0.460745
0.269987
0.342387
0.311283
0.217101
0.253962
0.126688
0.373801
0.401577
0.225174
0.170439
0.314176
0.241903
0.355473
0.0367744
0.261901
0.34297
0.117981
0.112686
0.0596184
0.466836
0.438553
0.279032
0.423653
0.548428
0.161856
0.140671
0.120904
0.509754
0.112643
0.084008
0.10346
0.112203
0.128482
0.615864
0.0585844
0.452348
0.475144
0.433409
0.101159
0.106674
0.362977
0.23771
0.344927
0.115755
0.229883
0.289268
0.160645
0.0143375
0.260872
0.209429
0.201428
0.248894
0.562315
0.0687593
0.545908
0.432883
0.389314
0.358541
0.230182
0.311181
0.62405
0.599501
0.0408539
0.09251
0.635083
0.0434047
0.109679
0.365133
0.48855
0.44543
0.430256
0.106597
0.575028
0.507882
0.16653
0.375967
0.472266
0.346885
0.489191
0.299604
0.274722
0.258476
0.432396
0.242929
0.256023
0.0278894
0.19217
0.670841
0.32911
0.450379
0.642464
0.432559
0.234443
0.208348
0.901957
0.213813
0.263777
0.285566
0.427781
0.826495
0.255453
0.256684
0.0775127
0.0760777
0.218324
1
0.393674
0.221354
0.212775
0.261728
0.350013
0.324924
0.20214
0.119715
0.901006
0.332879
0.713074
0.688981
0.101894
0.644172
0.677206
0.223098
0.63766
0.64404
0.110263
0.138989
0.179193
0.439286
0.422766
0.167049
0.119999
0.0400674
0.266845
0.274545
0.192413
0.184137
0
0.367103
0.0427053
0.230933
0.184746
0.183965
0.266157
0.615109
0.936887
0.389128
0.869256
0.144417
0.4125
0.411352
0.416905
0.381282
0.325506

## Sheet: Figure 2J
Relative position along the axis	Auxin Conc. [IAA] non-Vasc	Auxin Conc. [IAA] Vasc
0	1.39042	0.597603
0.0126582	0.971399	0.400265
0.0253165	1.17459	0.346704
0.0379747	1.50207	0.383239
0.0506329	1.48592	0.43051
0.0632911	1.13597	0.430465
0.0759494	0.823429	0.405975
0.0886076	0.664336	0.396508
0.101266	0.594973	0.40838
0.113924	0.560996	0.421399
0.126582	0.541789	0.420683
0.139241	0.522246	0.415137
0.151899	0.490122	0.419397
0.164557	0.451364	0.436681
0.177215	0.419044	0.449263
0.189873	0.40272	0.441016
0.202532	0.398946	0.421139
0.21519	0.401292	0.4086
0.227848	0.404391	0.409603
0.240506	0.404906	0.416706
0.253165	0.399847	0.423229
0.265823	0.390055	0.428958
0.278481	0.380838	0.435378
0.291139	0.377294	0.441445
0.303797	0.378416	0.443892
0.316456	0.378873	0.441613
0.329114	0.374476	0.440429
0.341772	0.366975	0.44666
0.35443	0.359872	0.45879
0.367089	0.355218	0.471041
0.379747	0.352703	0.479405
0.392405	0.351842	0.482446
0.405063	0.352515	0.47971
0.417722	0.354791	0.472716
0.43038	0.358141	0.463437
0.443038	0.360995	0.454809
0.455696	0.361734	0.44998
0.468354	0.359084	0.448781
0.481013	0.352067	0.447944
0.493671	0.342875	0.445627
0.506329	0.336361	0.44337
0.518987	0.334377	0.442967
0.531646	0.333194	0.444282
0.544304	0.329622	0.446097
0.556962	0.324837	0.447055
0.56962	0.320917	0.445604
0.582278	0.318604	0.440798
0.594937	0.317937	0.434512
0.607595	0.317389	0.429204
0.620253	0.313837	0.424882
0.632911	0.306755	0.419946
0.64557	0.300337	0.413026
0.658228	0.296839	0.403099
0.670886	0.292179	0.390385
0.683544	0.283522	0.37914
0.696203	0.275787	0.373858
0.708861	0.273503	0.373435
0.721519	0.273574	0.373723
0.734177	0.272088	0.371795
0.746835	0.26939	0.368088
0.759494	0.266892	0.363598
0.772152	0.264784	0.358974
0.78481	0.262563	0.354049
0.797468	0.259915	0.348537
0.810127	0.257186	0.342182
0.822785	0.254854	0.33515
0.835443	0.253214	0.327903
0.848101	0.251501	0.320908
0.860759	0.248566	0.314635
0.873418	0.243261	0.309442
0.886076	0.234741	0.305224
0.898734	0.223904	0.301756
0.911392	0.212271	0.298811
0.924051	0.201362	0.296162
0.936709	0.1927	0.293582
0.949367	0.187805	0.290845
0.962025	0.188199	0.287725
0.974684	0.195402	0.283995
0.987342	0.210937	0.279428
1	0.236324	0.273798

## Sheet: Figure 2K
Line	Time after cell division	PINs rel. abundance			Intervals	Time after cell division	PINs rel. abundance (min)	PINs rel. abundance (max)
1	0.01	0.724855			1	0.01	0.16734	1.28237
2	0.02	0.757815			2	0.02	0.196809	1.31882
3	0.03	0.790608			3	0.03	0.225091	1.35613
4	0.04	0.823253			4	0.04	0.252247	1.39426
5	0.05	0.855763			5	0.05	0.278339	1.43319
6	0.06	0.88815			6	0.06	0.303424	1.47287
7	0.07	0.920419			7	0.07	0.32756	1.51328
8	0.08	0.95258			8	0.08	0.350798	1.55436
9	0.09	0.984631			9	0.09	0.373192	1.59607
10	0.1	1.01658			10	0.1	0.394789	1.63837
11	0.11	1.04842			11	0.11	0.415641	1.6812
12	0.12	1.08016			12	0.12	0.435788	1.72453
13	0.13	1.11179			13	0.13	0.455279	1.76831
14	0.14	1.14332			14	0.14	0.474153	1.81249
15	0.15	1.17475			15	0.15	0.492451	1.85704
16	0.16	1.20607			16	0.16	0.510207	1.90193
17	0.17	1.23728			17	0.17	0.527462	1.9471
18	0.18	1.26839			18	0.18	0.544246	1.99254
19	0.19	1.29939			19	0.19	0.560588	2.0382
20	0.2	1.33028			20	0.2	0.576517	2.08405
21	0.21	1.36107			21	0.21	0.592068	2.13008
22	0.22	1.39175			22	0.22	0.607257	2.17624
23	0.23	1.42231			23	0.23	0.622116	2.22251
24	0.24	1.45277			24	0.24	0.636661	2.26888
25	0.25	1.48312			25	0.25	0.650915	2.31533
26	0.26	1.51336			26	0.26	0.664899	2.36182
27	0.27	1.54348			27	0.27	0.678627	2.40834
28	0.28	1.5735			28	0.28	0.692124	2.45487
29	0.29	1.6034			29	0.29	0.705401	2.5014
30	0.3	1.63319			30	0.3	0.718474	2.54791
31	0.31	1.66287			31	0.31	0.731357	2.59438
32	0.32	1.69244			32	0.32	0.744067	2.64082
33	0.33	1.7219			33	0.33	0.756612	2.68719
34	0.34	1.75125			34	0.34	0.76901	2.73348
35	0.35	1.78048			35	0.35	0.781268	2.7797
36	0.36	1.80961			36	0.36	0.793407	2.82581
37	0.37	1.83863			37	0.37	0.805428	2.87183
38	0.38	1.86754			38	0.38	0.817352	2.91773
39	0.39	1.89634			39	0.39	0.829182	2.96351
40	0.4	1.92504			40	0.4	0.840933	3.00915
41	0.41	1.95364			41	0.41	0.852618	3.05465
42	0.42	1.98213			42	0.42	0.864242	3.10001
43	0.43	2.01051			43	0.43	0.875817	3.14521
44	0.44	2.0388			44	0.44	0.887354	3.19025
45	0.45	2.06699			45	0.45	0.898856	3.23512
46	0.46	2.09507			46	0.46	0.910336	3.27981
47	0.47	2.12306			47	0.47	0.921794	3.32432
48	0.48	2.15095			48	0.48	0.933238	3.36865
49	0.49	2.17873			49	0.49	0.94467	3.4128
50	0.5	2.20642			50	0.5	0.956095	3.45675
51	0.51	2.23401			51	0.51	0.967516	3.5005
52	0.52	2.2615			52	0.52	0.978927	3.54407
53	0.53	2.28888			53	0.53	0.990332	3.58743
54	0.54	2.31616			54	0.54	1.00173	3.63058
55	0.55	2.34334			55	0.55	1.01312	3.67355
56	0.56	2.37041			56	0.56	1.02452	3.71631
57	0.57	2.39738			57	0.57	1.0359	3.75885
58	0.58	2.42424			58	0.58	1.04728	3.8012
59	0.59	2.45099			59	0.59	1.05865	3.84333
60	0.6	2.47764			60	0.6	1.07002	3.88526
61	0.61	2.50419			61	0.61	1.0814	3.92698
62	0.62	2.53063			62	0.62	1.09277	3.96849
63	0.63	2.55697			63	0.63	1.10415	4.00978
64	0.64	2.5832			64	0.64	1.11554	4.05086
65	0.65	2.60933			65	0.65	1.12694	4.09173
66	0.66	2.63537			66	0.66	1.13835	4.13238
67	0.67	2.6613			67	0.67	1.14978	4.17281
68	0.68	2.68714			68	0.68	1.16124	4.21304
69	0.69	2.71288			69	0.69	1.17271	4.25304
70	0.7	2.73853			70	0.7	1.18422	4.29283
71	0.71	2.76409			71	0.71	1.19577	4.33241
72	0.72	2.78957			72	0.72	1.20736	4.37177
73	0.73	2.81495			73	0.73	1.21899	4.41092
74	0.74	2.84026			74	0.74	1.23067	4.44985
75	0.75	2.8655			75	0.75	1.24241	4.48858
76	0.76	2.89066			76	0.76	1.25422	4.5271
77	0.77	2.91575			77	0.77	1.2661	4.5654
78	0.78	2.94078			78	0.78	1.27805	4.60351
79	0.79	2.96575			79	0.79	1.29009	4.6414
80	0.8	2.99067			80	0.8	1.30223	4.67911
81	0.81	3.01555			81	0.81	1.31448	4.71663
82	0.82	3.0404			82	0.82	1.32684	4.75397
83	0.83	3.06523			83	0.83	1.33933	4.79113
84	0.84	3.09006			84	0.84	1.35197	4.82815
85	0.85	3.1149			85	0.85	1.36478	4.86502
86	0.86	3.13976			86	0.86	1.37776	4.90177
87	0.87	3.16468			87	0.87	1.39094	4.93842
88	0.88	3.18968			88	0.88	1.40436	4.975
89	0.89	3.21479			89	0.89	1.41803	5.01155
90	0.9	3.24004			90	0.9	1.43198	5.04809
91	0.91	3.26546			91	0.91	1.44624	5.08468
92	0.92	3.29112			92	0.92	1.46087	5.12137
93	0.93	3.31707			93	0.93	1.47591	5.15822
94	0.94	3.34336			94	0.94	1.4914	5.19532
95	0.95	3.37007			95	0.95	1.50741	5.23274
96	0.96	3.39729			96	0.96	1.52399	5.27059
97	0.97	3.42511			97	0.97	1.54122	5.309
98	0.98	3.45366			98	0.98	1.55919	5.34812
99	0.99	3.48307			99	0.99	1.578	5.38814
100	1	3.51351			100	1	1.59774	5.42929
101	1.01	3.54519			101	1.01	1.61854	5.47184
102	1.02	3.57832			102	1.02	1.64052	5.51611
103	1.03	3.61321			103	1.03	1.66385	5.56256
104	1.04	3.65019			104	1.04	1.68867	5.6117
105	1.05	3.68966			105	1.05	1.71513	5.66419
106	1.06	3.73212			106	1.06	1.74338	5.72085
107	1.07	3.77812			107	1.07	1.77353	5.78271
108	1.08	3.82827			108	1.08	1.80557	5.85096
109	1.09	3.8832			109	1.09	1.8394	5.927
110	1.1	3.94347			110	1.1	1.87468	6.01226
111	1.11	4.00945			111	1.11	1.91083	6.10808
112	1.12	4.0812			112	1.12	1.94707	6.21533
113	1.13	4.15838			113	1.13	1.98248	6.33427
114	1.14	4.24036			114	1.14	2.0163	6.46443
115	1.15	4.32638			115	1.15	2.04797	6.60479
116	1.16	4.41568			116	1.16	2.07727	6.7541
117	1.17	4.50769			117	1.17	2.10425	6.91114
118	1.18	4.602			118	1.18	2.12916	7.07485
119	1.19	4.69837			119	1.19	2.15233	7.2444
120	1.2	4.79665			120	1.2	2.17417	7.41914
121	1.21	4.89683			121	1.21	2.19506	7.5986
122	1.22	4.99893			122	1.22	2.21542	7.78244
123	1.23	5.10298			123	1.23	2.2356	7.97036
124	1.24	5.20908			124	1.24	2.25597	8.16219
125	1.25	5.31734			125	1.25	2.27687	8.35782
126	1.26	5.4279			126	1.26	2.2986	8.55719
127	1.27	5.54089			127	1.27	2.32146	8.76032
128	1.28	5.65647			128	1.28	2.3457	8.96725
129	1.29	5.77479			129	1.29	2.37155	9.17804
130	1.3	5.89601			130	1.3	2.39918	9.39283
131	1.31	6.02018			131	1.31	2.42874	9.61162
132	1.32	6.14737			132	1.32	2.4603	9.83445
133	1.33	6.27757			133	1.33	2.49383	10.0613
134	1.34	6.41068			134	1.34	2.52924	10.2921
135	1.35	6.54648			135	1.35	2.56637	10.5266
136	1.36	6.68476			136	1.36	2.60499	10.7645
137	1.37	6.8252			137	1.37	2.64481	11.0056
138	1.38	6.9674			138	1.38	2.68559	11.2492
139	1.39	7.11106			139	1.39	2.72703	11.4951
140	1.4	7.25584			140	1.4	2.76888	11.7428
141	1.41	7.4014			141	1.41	2.81095	11.9919
142	1.42	7.54751			142	1.42	2.85305	12.242
143	1.43	7.69393			143	1.43	2.89502	12.4928
144	1.44	7.84044			144	1.44	2.93679	12.7441
145	1.45	7.98688			145	1.45	2.97826	12.9955
146	1.46	8.13312			146	1.46	3.01935	13.2469
147	1.47	8.27904			147	1.47	3.06003	13.498
148	1.48	8.42455			148	1.48	3.10023	13.7489
149	1.49	8.5695			149	1.49	3.13999	13.999
150	1.5	8.71392			150	1.5	3.17925	14.2486
151	1.51	8.85768			151	1.51	3.218	14.4974
152	1.52	9.00079			152	1.52	3.25626	14.7453
153	1.53	9.14314			153	1.53	3.29403	14.9922
154	1.54	9.28477			154	1.54	3.3313	15.2383
155	1.55	9.42562			155	1.55	3.36809	15.4832
156	1.56	9.56566			156	1.56	3.4044	15.7269
157	1.57	9.70484			157	1.57	3.44026	15.9694
158	1.58	9.84323			158	1.58	3.47566	16.2108
159	1.59	9.9808			159	1.59	3.51063	16.451
160	1.6	10.1175			160	1.6	3.54517	16.6898
161	1.61	10.2533			161	1.61	3.5793	16.9273
162	1.62	10.3883			162	1.62	3.61304	17.1635
163	1.63	10.5224			163	1.63	3.64642	17.3983
164	1.64	10.6556			164	1.64	3.67944	17.6318
165	1.65	10.788			165	1.65	3.71214	17.8638
166	1.66	10.9195			166	1.66	3.74455	18.0945
167	1.67	11.0502			167	1.67	3.77668	18.3237
168	1.68	11.1801			168	1.68	3.80857	18.5516
169	1.69	11.3091			169	1.69	3.84022	18.7779
170	1.7	11.4373			170	1.7	3.87171	19.0028
171	1.71	11.5647			171	1.71	3.90303	19.2263
172	1.72	11.6913			172	1.72	3.93425	19.4484
173	1.73	11.8172			173	1.73	3.96541	19.6689
174	1.74	11.9423			174	1.74	3.99654	19.8881
175	1.75	12.0667			175	1.75	4.02769	20.1058
176	1.76	12.1905			176	1.76	4.05892	20.322
177	1.77	12.3135			177	1.77	4.09029	20.5368
178	1.78	12.436			178	1.78	4.12185	20.7501
179	1.79	12.5578			179	1.79	4.15369	20.962
180	1.8	12.6791			180	1.8	4.18585	21.1724
181	1.81	12.7999			181	1.81	4.21843	21.3814
182	1.82	12.9203			182	1.82	4.25153	21.589
183	1.83	13.0402			183	1.83	4.28521	21.7951
184	1.84	13.1597			184	1.84	4.31961	21.9999
185	1.85	13.279			185	1.85	4.35481	22.2032
186	1.86	13.3981			186	1.86	4.39095	22.4052
187	1.87	13.5169			187	1.87	4.42814	22.6057
188	1.88	13.6357			188	1.88	4.46656	22.8049
189	1.89	13.7545			189	1.89	4.50633	23.0027
190	1.9	13.8734			190	1.9	4.54761	23.1992
191	1.91	13.9925			191	1.91	4.59061	23.3944
192	1.92	14.1119			192	1.92	4.63548	23.5883
193	1.93	14.2316			193	1.93	4.6824	23.7808
194	1.94	14.3519			194	1.94	4.73159	23.9721
195	1.95	14.4728			195	1.95	4.78326	24.1623
196	1.96	14.5944			196	1.96	4.83758	24.3512
197	1.97	14.7169			197	1.97	4.89475	24.539
198	1.98	14.8403			198	1.98	4.95493	24.7257
199	1.99	14.9648			199	1.99	5.01825	24.9113
200	2	15.0904			200	2	5.08483	25.0959
201	2.01	15.2171			201	2.01	5.15472	25.2795
202	2.02	15.3451			202	2.02	5.22794	25.4623
203	2.03	15.4743			203	2.03	5.30443	25.6441
204	2.04	15.6046			204	2.04	5.38406	25.8252
205	2.05	15.7361			205	2.05	5.46667	26.0054
206	2.06	15.8685			206	2.06	5.55204	26.185
207	2.07	16.0019			207	2.07	5.63988	26.3638
208	2.08	16.136			208	2.08	5.72991	26.542
209	2.09	16.2707			209	2.09	5.82183	26.7195
210	2.1	16.4058			210	2.1	5.91529	26.8964
211	2.11	16.5413			211	2.11	6.01005	27.0726
212	2.12	16.677			212	2.12	6.10577	27.2481
213	2.13	16.8127			213	2.13	6.2022	27.4231
214	2.14	16.9482			214	2.14	6.29908	27.5973
215	2.15	17.0836			215	2.15	6.39628	27.771
216	2.16	17.2187			216	2.16	6.49355	27.9439
217	2.17	17.3535			217	2.17	6.59075	28.1162
218	2.18	17.4878			218	2.18	6.68778	28.2878
219	2.19	17.6215			219	2.19	6.78449	28.4586
220	2.2	17.7547			220	2.2	6.8808	28.6287
221	2.21	17.8873			221	2.21	6.97661	28.7981
222	2.22	18.0193			222	2.22	7.07187	28.9667
223	2.23	18.1506			223	2.23	7.16654	29.1346
224	2.24	18.2811			224	2.24	7.26057	29.3016
225	2.25	18.4109			225	2.25	7.35389	29.4678
226	2.26	18.5399			226	2.26	7.44653	29.6333
227	2.27	18.6682			227	2.27	7.53844	29.7979
228	2.28	18.7957			228	2.28	7.6296	29.9617
229	2.29	18.9223			229	2.29	7.72001	30.1246
230	2.3	19.0482			230	2.3	7.80967	30.2867
231	2.31	19.1732			231	2.31	7.89861	30.4479
232	2.32	19.2975			232	2.32	7.98678	30.6081
233	2.33	19.4209			233	2.33	8.07422	30.7675
234	2.34	19.5435			234	2.34	8.16092	30.926
235	2.35	19.6652			235	2.35	8.24687	31.0835
236	2.36	19.7861			236	2.36	8.33214	31.2401
237	2.37	19.9062			237	2.37	8.41671	31.3958
238	2.38	20.0255			238	2.38	8.50057	31.5504
239	2.39	20.144			239	2.39	8.5838	31.7042
240	2.4	20.2616			240	2.4	8.66635	31.8569
241	2.41	20.3785			241	2.41	8.74829	32.0087
242	2.42	20.4945			242	2.42	8.82957	32.1595
243	2.43	20.6098			243	2.43	8.91028	32.3092
244	2.44	20.7242			244	2.44	8.99041	32.458
245	2.45	20.8378			245	2.45	9.06996	32.6057
246	2.46	20.9507			246	2.46	9.14899	32.7524
247	2.47	21.0628			247	2.47	9.22747	32.8981
248	2.48	21.1741			248	2.48	9.30546	33.0428
249	2.49	21.2847			249	2.49	9.38297	33.1863
250	2.5	21.3945			250	2.5	9.46003	33.3289
251	2.51	21.5035			251	2.51	9.5366	33.4704
252	2.52	21.6118			252	2.52	9.61279	33.6108
253	2.53	21.7193			253	2.53	9.68856	33.7501
254	2.54	21.8262			254	2.54	9.76396	33.8884
255	2.55	21.9323			255	2.55	9.83899	34.0256
256	2.56	22.0377			256	2.56	9.91366	34.1616
257	2.57	22.1424			257	2.57	9.98801	34.2967
258	2.58	22.2463			258	2.58	10.062	34.4306
259	2.59	22.3496			259	2.59	10.1358	34.5634
260	2.6	22.4522			260	2.6	10.2093	34.6951
261	2.61	22.5541			261	2.61	10.2825	34.8257
262	2.62	22.6553			262	2.62	10.3555	34.9552
263	2.63	22.7559			263	2.63	10.4282	35.0836
264	2.64	22.8558			264	2.64	10.5007	35.2109
265	2.65	22.955			265	2.65	10.5731	35.337
266	2.66	23.0536			266	2.66	10.6452	35.4621
267	2.67	23.1516			267	2.67	10.7172	35.586
268	2.68	23.2489			268	2.68	10.789	35.7088
269	2.69	23.3456			269	2.69	10.8606	35.8305
270	2.7	23.4416			270	2.7	10.9321	35.9511
271	2.71	23.537			271	2.71	11.0035	36.0705
272	2.72	23.6318			272	2.72	11.0747	36.1889
273	2.73	23.7259			273	2.73	11.1457	36.3062
274	2.74	23.8195			274	2.74	11.2167	36.4223
275	2.75	23.9124			275	2.75	11.2874	36.5374
276	2.76	24.0047			276	2.76	11.3581	36.6514
277	2.77	24.0965			277	2.77	11.4286	36.7643
278	2.78	24.1875			278	2.78	11.499	36.8761
279	2.79	24.278			279	2.79	11.5692	36.9868
280	2.8	24.3679			280	2.8	11.6393	37.0965
281	2.81	24.4572			281	2.81	11.7092	37.2051
282	2.82	24.5458			282	2.82	11.779	37.3127
283	2.83	24.6339			283	2.83	11.8485	37.4192
284	2.84	24.7213			284	2.84	11.9179	37.5247
285	2.85	24.8081			285	2.85	11.9871	37.6292
286	2.86	24.8944			286	2.86	12.056	37.7327
287	2.87	24.98			287	2.87	12.1248	37.8352
288	2.88	25.0649			288	2.88	12.1933	37.9366
289	2.89	25.1493			289	2.89	12.2615	38.0371
290	2.9	25.2331			290	2.9	12.3295	38.1367
291	2.91	25.3162			291	2.91	12.3971	38.2353
292	2.92	25.3987			292	2.92	12.4645	38.333
293	2.93	25.4806			293	2.93	12.5316	38.4297
294	2.94	25.5619			294	2.94	12.5984	38.5255
295	2.95	25.6426			295	2.95	12.6648	38.6204
296	2.96	25.7226			296	2.96	12.7308	38.7144
297	2.97	25.802			297	2.97	12.7965	38.8075
298	2.98	25.8808			298	2.98	12.8618	38.8997
299	2.99	25.959			299	2.99	12.9268	38.9911
300	3	26.0365			300	3	12.9913	39.0816
301	3.01	26.1134			301	3.01	13.0554	39.1713
302	3.02	26.1897			302	3.02	13.1191	39.2602
303	3.03	26.2653			303	3.03	13.1824	39.3482
304	3.04	26.3403			304	3.04	13.2452	39.4354
305	3.05	26.4147			305	3.05	13.3076	39.5218
306	3.06	26.4885			306	3.06	13.3695	39.6075
307	3.07	26.5616			307	3.07	13.431	39.6923
308	3.08	26.6342			308	3.08	13.492	39.7764
309	3.09	26.7061			309	3.09	13.5525	39.8597
310	3.1	26.7774			310	3.1	13.6125	39.9422
311	3.11	26.848			311	3.11	13.6721	40.024
312	3.12	26.9181			312	3.12	13.7311	40.1051
313	3.13	26.9876			313	3.13	13.7897	40.1855
314	3.14	27.0564			314	3.14	13.8477	40.265
315	3.15	27.1246			315	3.15	13.9053	40.3439
316	3.16	27.1923			316	3.16	13.9624	40.4221
317	3.17	27.2593			317	3.17	14.019	40.4997
318	3.18	27.3257			318	3.18	14.0751	40.5764
319	3.19	27.3916			319	3.19	14.1306	40.6525
320	3.2	27.4568			320	3.2	14.1857	40.7279
321	3.21	27.5215			321	3.21	14.2402	40.8027
322	3.22	27.5856			322	3.22	14.2943	40.8768
323	3.23	27.649			323	3.23	14.3478	40.9503
324	3.24	27.7119			324	3.24	14.4009	41.023
325	3.25	27.7743			325	3.25	14.4534	41.0952
326	3.26	27.8361			326	3.26	14.5055	41.1667
327	3.27	27.8972			327	3.27	14.557	41.2375
328	3.28	27.9579			328	3.28	14.6081	41.3077
329	3.29	28.018			329	3.29	14.6586	41.3773
330	3.3	28.0775			330	3.3	14.7087	41.4463
331	3.31	28.1365			331	3.31	14.7582	41.5147
332	3.32	28.1949			332	3.32	14.8073	41.5824
333	3.33	28.2528			333	3.33	14.8559	41.6496
334	3.34	28.3101			334	3.34	14.904	41.7162
335	3.35	28.3669			335	3.35	14.9516	41.7821
336	3.36	28.4231			336	3.36	14.9988	41.8475
337	3.37	28.4789			337	3.37	15.0455	41.9123
338	3.38	28.5341			338	3.38	15.0916	41.9765
339	3.39	28.5888			339	3.39	15.1374	42.0401
340	3.4	28.6429			340	3.4	15.1827	42.1032
341	3.41	28.6966			341	3.41	15.2275	42.1657
342	3.42	28.7497			342	3.42	15.2718	42.2277
343	3.43	28.8024			343	3.43	15.3157	42.2891
344	3.44	28.8545			344	3.44	15.3591	42.3499
345	3.45	28.9062			345	3.45	15.4021	42.4103
346	3.46	28.9574			346	3.46	15.4447	42.47
347	3.47	29.008			347	3.47	15.4868	42.5293
348	3.48	29.0582			348	3.48	15.5285	42.588
349	3.49	29.1079			349	3.49	15.5697	42.6461
350	3.5	29.1572			350	3.5	15.6105	42.7038
351	3.51	29.2059			351	3.51	15.6509	42.7609
352	3.52	29.2542			352	3.52	15.6909	42.8175
353	3.53	29.302			353	3.53	15.7304	42.8736
354	3.54	29.3494			354	3.54	15.7696	42.9292
355	3.55	29.3963			355	3.55	15.8083	42.9843
356	3.56	29.4427			356	3.56	15.8466	43.0388
357	3.57	29.4887			357	3.57	15.8845	43.0929
358	3.58	29.5343			358	3.58	15.9221	43.1465
359	3.59	29.5794			359	3.59	15.9592	43.1996
360	3.6	29.6241			360	3.6	15.9959	43.2522
361	3.61	29.6683			361	3.61	16.0323	43.3043
362	3.62	29.7121			362	3.62	16.0682	43.356
363	3.63	29.7555			363	3.63	16.1038	43.4071
364	3.64	29.7984			364	3.64	16.139	43.4578
365	3.65	29.841			365	3.65	16.1739	43.5081
366	3.66	29.8831			366	3.66	16.2083	43.5578
367	3.67	29.9248			367	3.67	16.2424	43.6071
368	3.68	29.9661			368	3.68	16.2762	43.656
369	3.69	30.007			369	3.69	16.3096	43.7044
370	3.7	30.0474			370	3.7	16.3426	43.7523
371	3.71	30.0875			371	3.71	16.3753	43.7997
372	3.72	30.1272			372	3.72	16.4076	43.8468
373	3.73	30.1665			373	3.73	16.4396	43.8934
374	3.74	30.2054			374	3.74	16.4713	43.9396
375	3.75	30.2439			375	3.75	16.5026	43.9853
376	3.76	30.2821			376	3.76	16.5336	44.0306
377	3.77	30.3198			377	3.77	16.5642	44.0755
378	3.78	30.3572			378	3.78	16.5945	44.1198
379	3.79	30.3942			379	3.79	16.6246	44.1639
380	3.8	30.4309			380	3.8	16.6543	44.2075
381	3.81	30.4672			381	3.81	16.6836	44.2507
382	3.82	30.5031			382	3.82	16.7127	44.2935
383	3.83	30.5386			383	3.83	16.7414	44.3358
384	3.84	30.5738			384	3.84	16.7699	44.3777
385	3.85	30.6087			385	3.85	16.798	44.4193
386	3.86	30.6432			386	3.86	16.8259	44.4604
387	3.87	30.6773			387	3.87	16.8535	44.5012
388	3.88	30.7111			388	3.88	16.8807	44.5416
389	3.89	30.7446			389	3.89	16.9077	44.5815
390	3.9	30.7777			390	3.9	16.9344	44.6211
391	3.91	30.8105			391	3.91	16.9608	44.6602
392	3.92	30.843			392	3.92	16.9869	44.699
393	3.93	30.8751			393	3.93	17.0128	44.7375
394	3.94	30.9069			394	3.94	17.0383	44.7755
395	3.95	30.9384			395	3.95	17.0636	44.8132
396	3.96	30.9696			396	3.96	17.0887	44.8505
397	3.97	31.0004			397	3.97	17.1135	44.8874
398	3.98	31.031			398	3.98	17.138	44.924
399	3.99	31.0612			399	3.99	17.1622	44.9602
400	4	31.0911			400	4	17.1862	44.996
401	4.01	31.1207			401	4.01	17.21	45.0315
402	4.02	31.1501			402	4.02	17.2335	45.0667
403	4.03	31.1791			403	4.03	17.2567	45.1015
404	4.04	31.2078			404	4.04	17.2797	45.1359
405	4.05	31.2362			405	4.05	17.3025	45.17
406	4.06	31.2644			406	4.06	17.325	45.2037
407	4.07	31.2922			407	4.07	17.3473	45.2371
408	4.08	31.3198			408	4.08	17.3693	45.2702
409	4.09	31.347			409	4.09	17.3911	45.3029
410	4.1	31.374			410	4.1	17.4127	45.3353
411	4.11	31.4008			411	4.11	17.4341	45.3674
412	4.12	31.4272			412	4.12	17.4552	45.3992
413	4.13	31.4534			413	4.13	17.4762	45.4306
414	4.14	31.4793			414	4.14	17.4969	45.4618
415	4.15	31.5049			415	4.15	17.5173	45.4925
416	4.16	31.5303			416	4.16	17.5376	45.523
417	4.17	31.5554			417	4.17	17.5577	45.5531
418	4.18	31.5802			418	4.18	17.5775	45.583
419	4.19	31.6049			419	4.19	17.5972	45.6126
420	4.2	31.6292			420	4.2	17.6166	45.6418
421	4.21	31.6533			421	4.21	17.6358	45.6707
422	4.22	31.6771			422	4.22	17.6549	45.6994
423	4.23	31.7007			423	4.23	17.6737	45.7277
424	4.24	31.7241			424	4.24	17.6923	45.7558
425	4.25	31.7472			425	4.25	17.7108	45.7836
426	4.26	31.77			426	4.26	17.729	45.811
427	4.27	31.7927			427	4.27	17.7471	45.8382
428	4.28	31.8151			428	4.28	17.765	45.8651
429	4.29	31.8372			429	4.29	17.7827	45.8918
430	4.3	31.8591			430	4.3	17.8002	45.9181
431	4.31	31.8809			431	4.31	17.8175	45.9442
432	4.32	31.9023			432	4.32	17.8347	45.97
433	4.33	31.9236			433	4.33	17.8517	45.9955
434	4.34	31.9446			434	4.34	17.8685	46.0208
435	4.35	31.9654			435	4.35	17.8851	46.0457
436	4.36	31.986			436	4.36	17.9016	46.0705
437	4.37	32.0064			437	4.37	17.9179	46.095
438	4.38	32.0266			438	4.38	17.934	46.1192
439	4.39	32.0465			439	4.39	17.9499	46.1431
440	4.4	32.0663			440	4.4	17.9657	46.1669
441	4.41	32.0858			441	4.41	17.9814	46.1903
442	4.42	32.1052			442	4.42	17.9968	46.2135
443	4.43	32.1243			443	4.43	18.0121	46.2365
444	4.44	32.1433			444	4.44	18.0273	46.2592
445	4.45	32.162			445	4.45	18.0423	46.2817
446	4.46	32.1806			446	4.46	18.0572	46.3039
447	4.47	32.1989			447	4.47	18.0719	46.3259
448	4.48	32.2171			448	4.48	18.0864	46.3477
449	4.49	32.235			449	4.49	18.1008	46.3692
450	4.5	32.2528			450	4.5	18.1151	46.3905
451	4.51	32.2704			451	4.51	18.1292	46.4116
452	4.52	32.2878			452	4.52	18.1431	46.4325
453	4.53	32.3051			453	4.53	18.157	46.4531
454	4.54	32.3221			454	4.54	18.1707	46.4735
455	4.55	32.339			455	4.55	18.1842	46.4937
456	4.56	32.3556			456	4.56	18.1976	46.5136
457	4.57	32.3722			457	4.57	18.2109	46.5335
458	4.58	32.3885			458	4.58	18.224	46.5529
459	4.59	32.4047			459	4.59	18.2371	46.5723
460	4.6	32.4207			460	4.6	18.25	46.5915
461	4.61	32.4365			461	4.61	18.2627	46.6104
462	4.62	32.4522			462	4.62	18.2753	46.6291
463	4.63	32.4677			463	4.63	18.2878	46.6476
464	4.64	32.4831			464	4.64	18.3002	46.666
465	4.65	32.4983			465	4.65	18.3124	46.6841
466	4.66	32.5133			466	4.66	18.3246	46.702
467	4.67	32.5281			467	4.67	18.3366	46.7197
468	4.68	32.5429			468	4.68	18.3485	46.7373
469	4.69	32.5574			469	4.69	18.3602	46.7546
470	4.7	32.5718			470	4.7	18.3719	46.7718
471	4.71	32.5861			471	4.71	18.3834	46.7887
472	4.72	32.6002			472	4.72	18.3948	46.8055
473	4.73	32.6141			473	4.73	18.4061	46.8221
474	4.74	32.628			474	4.74	18.4173	46.8386
475	4.75	32.6416			475	4.75	18.4284	46.8548
476	4.76	32.6552			476	4.76	18.4394	46.8709
477	4.77	32.6685			477	4.77	18.4502	46.8868
478	4.78	32.6818			478	4.78	18.461	46.9025
479	4.79	32.6949			479	4.79	18.4716	46.9181
480	4.8	32.7078			480	4.8	18.4822	46.9335
481	4.81	32.7206			481	4.81	18.4926	46.9487
482	4.82	32.7333			482	4.82	18.503	46.9637
483	4.83	32.7459			483	4.83	18.5132	46.9786
484	4.84	32.7583			484	4.84	18.5233	46.9933
485	4.85	32.7706			485	4.85	18.5334	47.0079
486	4.86	32.7828			486	4.86	18.5433	47.0223
487	4.87	32.7948			487	4.87	18.5531	47.0365
488	4.88	32.8067			488	4.88	18.5629	47.0506
489	4.89	32.8185			489	4.89	18.5725	47.0645
490	4.9	32.8302			490	4.9	18.5821	47.0783
491	4.91	32.8417			491	4.91	18.5915	47.0919
492	4.92	32.8531			492	4.92	18.6008	47.1054
493	4.93	32.8644			493	4.93	18.6101	47.1187
494	4.94	32.8756			494	4.94	18.6193	47.1319
495	4.95	32.8866			495	4.95	18.6284	47.1449
496	4.96	32.8976			496	4.96	18.6374	47.1578
497	4.97	32.9084			497	4.97	18.6463	47.1705
498	4.98	32.9191			498	4.98	18.6551	47.1831
499	4.99	32.9297			499	4.99	18.6638	47.1955
500	5	32.9402			500	5	18.6725	47.2079
501	5.01	32.9505			501	5.01	18.681	47.22
502	5.02	32.9608			502	5.02	18.6895	47.232
503	5.03	32.9709			503	5.03	18.6979	47.2439
504	5.04	32.9809			504	5.04	18.7062	47.2557
505	5.05	32.9909			505	5.05	18.7144	47.2673
506	5.06	33.0007			506	5.06	18.7225	47.2788
507	5.07	33.0104			507	5.07	18.7306	47.2901
508	5.08	33.02			508	5.08	18.7386	47.3014
509	5.09	33.0295			509	5.09	18.7465	47.3125
510	5.1	33.0389			510	5.1	18.7543	47.3235
511	5.11	33.0482			511	5.11	18.7621	47.3343
512	5.12	33.0574			512	5.12	18.7697	47.3451
513	5.13	33.0665			513	5.13	18.7773	47.3556
514	5.14	33.0755			514	5.14	18.7848	47.3661
515	5.15	33.0844			515	5.15	18.7923	47.3765
516	5.16	33.0931			516	5.16	18.7996	47.3867
517	5.17	33.1019			517	5.17	18.8069	47.3968
518	5.18	33.1105			518	5.18	18.8142	47.4068
519	5.19	33.119			519	5.19	18.8213	47.4167
520	5.2	33.1274			520	5.2	18.8284	47.4264
521	5.21	33.1357			521	5.21	18.8354	47.436
522	5.22	33.1439			522	5.22	18.8423	47.4455
523	5.23	33.1521			523	5.23	18.8492	47.455
524	5.24	33.1601			524	5.24	18.856	47.4642
525	5.25	33.1681			525	5.25	18.8627	47.4734
526	5.26	33.1759			526	5.26	18.8693	47.4825
527	5.27	33.1837			527	5.27	18.8759	47.4914
528	5.28	33.1914			528	5.28	18.8824	47.5003
529	5.29	33.199			529	5.29	18.8889	47.509
530	5.3	33.2065			530	5.3	18.8953	47.5176
531	5.31	33.2139			531	5.31	18.9016	47.5262
532	5.32	33.2212			532	5.32	18.9078	47.5346
533	5.33	33.2284			533	5.33	18.914	47.5429
534	5.34	33.2356			534	5.34	18.9201	47.5511
535	5.35	33.2427			535	5.35	18.9262	47.5592
536	5.36	33.2497			536	5.36	18.9322	47.5672
537	5.37	33.2566			537	5.37	18.9381	47.5751
538	5.38	33.2634			538	5.38	18.944	47.5829
539	5.39	33.2701			539	5.39	18.9498	47.5905
540	5.4	33.2768			540	5.4	18.9555	47.5981
541	5.41	33.2834			541	5.41	18.9612	47.6056
542	5.42	33.2899			542	5.42	18.9669	47.613
543	5.43	33.2963			543	5.43	18.9724	47.6203
544	5.44	33.3027			544	5.44	18.9779	47.6274
545	5.45	33.3089			545	5.45	18.9833	47.6345
546	5.46	33.3151			546	5.46	18.9887	47.6415
547	5.47	33.3212			547	5.47	18.9941	47.6484
548	5.48	33.3272			548	5.48	18.9993	47.6552
549	5.49	33.3332			549	5.49	19.0045	47.6619
550	5.5	33.3391			550	5.5	19.0097	47.6685
551	5.51	33.3449			551	5.51	19.0147	47.675
552	5.52	33.3506			552	5.52	19.0198	47.6814
553	5.53	33.3562			553	5.53	19.0247	47.6877
554	5.54	33.3618			554	5.54	19.0297	47.6939
555	5.55	33.3673			555	5.55	19.0345	47.7001
556	5.56	33.3727			556	5.56	19.0393	47.7061
557	5.57	33.3781			557	5.57	19.0441	47.7121
558	5.58	33.3834			558	5.58	19.0488	47.718
559	5.59	33.3886			559	5.59	19.0534	47.7237
560	5.6	33.3937			560	5.6	19.058	47.7294
561	5.61	33.3988			561	5.61	19.0625	47.735
562	5.62	33.4037			562	5.62	19.067	47.7405
563	5.63	33.4087			563	5.63	19.0714	47.7459
564	5.64	33.4135			564	5.64	19.0758	47.7512
565	5.65	33.4183			565	5.65	19.0801	47.7565
566	5.66	33.423			566	5.66	19.0843	47.7617
567	5.67	33.4276			567	5.67	19.0885	47.7667
568	5.68	33.4322			568	5.68	19.0927	47.7717
569	5.69	33.4367			569	5.69	19.0968	47.7766
570	5.7	33.4411			570	5.7	19.1008	47.7814
571	5.71	33.4455			571	5.71	19.1048	47.7862
572	5.72	33.4498			572	5.72	19.1087	47.7908
573	5.73	33.454			573	5.73	19.1126	47.7954
574	5.74	33.4582			574	5.74	19.1165	47.7998
575	5.75	33.4622			575	5.75	19.1202	47.8042
576	5.76	33.4663			576	5.76	19.124	47.8085
577	5.77	33.4702			577	5.77	19.1277	47.8128
578	5.78	33.4741			578	5.78	19.1313	47.8169
579	5.79	33.4779			579	5.79	19.1349	47.821
580	5.8	33.4817			580	5.8	19.1384	47.825
581	5.81	33.4854			581	5.81	19.1419	47.8289
582	5.82	33.489			582	5.82	19.1453	47.8327
583	5.83	33.4926			583	5.83	19.1487	47.8365
584	5.84	33.4961			584	5.84	19.152	47.8401
585	5.85	33.4995			585	5.85	19.1553	47.8437
586	5.86	33.5029			586	5.86	19.1585	47.8473
587	5.87	33.5062			587	5.87	19.1617	47.8507
588	5.88	33.5095			588	5.88	19.1649	47.854
589	5.89	33.5127			589	5.89	19.168	47.8573
590	5.9	33.5158			590	5.9	19.171	47.8605
591	5.91	33.5188			591	5.91	19.174	47.8637
592	5.92	33.5218			592	5.92	19.1769	47.8667
593	5.93	33.5248			593	5.93	19.1798	47.8697
594	5.94	33.5277			594	5.94	19.1827	47.8726
595	5.95	33.5305			595	5.95	19.1855	47.8755
596	5.96	33.5333			596	5.96	19.1882	47.8783
597	5.97	33.536			597	5.97	19.191	47.8809
598	5.98	33.5386			598	5.98	19.1936	47.8836
599	5.99	33.5412			599	5.99	19.1963	47.8861
600	6	33.5437			600	6	19.1988	47.8886
601	6.01	33.5462			601	6.01	19.2014	47.891
602	6.02	33.5486			602	6.02	19.2038	47.8934
603	6.03	33.551			603	6.03	19.2063	47.8956
604	6.04	33.5532			604	6.04	19.2087	47.8978
605	6.05	33.5555			605	6.05	19.211	47.9
606	6.06	33.5577			606	6.06	19.2133	47.902
607	6.07	33.5598			607	6.07	19.2156	47.9041
608	6.08	33.5619			608	6.08	19.2178	47.906
609	6.09	33.5639			609	6.09	19.22	47.9079
610	6.1	33.5659			610	6.1	19.2221	47.9097
611	6.11	33.5678			611	6.11	19.2242	47.9114
612	6.12	33.5697			612	6.12	19.2262	47.9131
613	6.13	33.5715			613	6.13	19.2283	47.9147
614	6.14	33.5733			614	6.14	19.2302	47.9163
615	6.15	33.575			615	6.15	19.2321	47.9178
616	6.16	33.5766			616	6.16	19.234	47.9192
617	6.17	33.5782			617	6.17	19.2359	47.9206
618	6.18	33.5798			618	6.18	19.2377	47.9219
619	6.19	33.5813			619	6.19	19.2394	47.9232
620	6.2	33.5827			620	6.2	19.2411	47.9244
621	6.21	33.5842			621	6.21	19.2428	47.9255
622	6.22	33.5855			622	6.22	19.2445	47.9266
623	6.23	33.5868			623	6.23	19.246	47.9276
624	6.24	33.5881			624	6.24	19.2476	47.9286
625	6.25	33.5894			625	6.25	19.2492	47.9295
626	6.26	33.5905			626	6.26	19.2506	47.9304
627	6.27	33.5917			627	6.27	19.2521	47.9312
628	6.28	33.5928			628	6.28	19.2535	47.932
629	6.29	33.5938			629	6.29	19.2549	47.9327
630	6.3	33.5948			630	6.3	19.2562	47.9334
631	6.31	33.5958			631	6.31	19.2575	47.934
632	6.32	33.5967			632	6.32	19.2588	47.9346
633	6.33	33.5976			633	6.33	19.26	47.9351
634	6.34	33.5984			634	6.34	19.2612	47.9356
635	6.35	33.5992			635	6.35	19.2624	47.936
636	6.36	33.5999			636	6.36	19.2635	47.9364
637	6.37	33.6007			637	6.37	19.2646	47.9367
638	6.38	33.6013			638	6.38	19.2657	47.937
639	6.39	33.602			639	6.39	19.2667	47.9373
640	6.4	33.6026			640	6.4	19.2677	47.9374
641	6.41	33.6032			641	6.41	19.2687	47.9376
642	6.42	33.6037			642	6.42	19.2696	47.9377
643	6.43	33.6042			643	6.43	19.2706	47.9378
644	6.44	33.6046			644	6.44	19.2714	47.9378
645	6.45	33.6051			645	6.45	19.2723	47.9379
646	6.46	33.6054			646	6.46	19.2731	47.9378
647	6.47	33.6058			647	6.47	19.2739	47.9377
648	6.48	33.6062			648	6.48	19.2746	47.9377
649	6.49	33.6064			649	6.49	19.2753	47.9375
650	6.5	33.6067			650	6.5	19.2761	47.9373
651	6.51	33.6069			651	6.51	19.2767	47.9371
652	6.52	33.6071			652	6.52	19.2774	47.9369
653	6.53	33.6073			653	6.53	19.278	47.9366
654	6.54	33.6074			654	6.54	19.2786	47.9363
655	6.55	33.6076			655	6.55	19.2792	47.936
656	6.56	33.6076			656	6.56	19.2797	47.9356
657	6.57	33.6077			657	6.57	19.2802	47.9351
658	6.58	33.6077			658	6.58	19.2807	47.9347
659	6.59	33.6077			659	6.59	19.2812	47.9343
660	6.6	33.6077			660	6.6	19.2816	47.9338
661	6.61	33.6077			661	6.61	19.282	47.9333
662	6.62	33.6076			662	6.62	19.2824	47.9328
663	6.63	33.6075			663	6.63	19.2828	47.9322
664	6.64	33.6074			664	6.64	19.2832	47.9316
665	6.65	33.6073			665	6.65	19.2835	47.931
666	6.66	33.6071			666	6.66	19.2838	47.9303
667	6.67	33.6069			667	6.67	19.2841	47.9297
668	6.68	33.6067			668	6.68	19.2844	47.929
669	6.69	33.6065			669	6.69	19.2846	47.9283
670	6.7	33.6062			670	6.7	19.2848	47.9276
671	6.71	33.6059			671	6.71	19.285	47.9268
672	6.72	33.6057			672	6.72	19.2852	47.9261
673	6.73	33.6053			673	6.73	19.2854	47.9253
674	6.74	33.605			674	6.74	19.2855	47.9245
675	6.75	33.6047			675	6.75	19.2857	47.9237
