# Supplementary material for: A coupled mechano-biochemical model for cell polarity guided anisotropic root growth
Source: eLife. 2021 Nov 1;10:e72132. doi: 10.7554/eLife.72132 (PMC8716106; doi:10.7554/eLife.72132)
Supplement: Figure 3—source data 1. [file elife-72132-fig3-data1.xlsx]

## Sheet: Figure 3E
No Reflux No QC source	No Reflux QC source	Reflux No QC source	Reflux QC source
1.77114	1.60404	2.59566	2.15093
1.83231	1.65576	2.59904	2.22758
1.90408	1.70719	2.60392	2.29475
1.97043	1.76389	2.60998	2.35432
2.03103	1.83091	2.61696	2.40716
2.08513	1.9001	2.62459	2.45501
2.13305	1.96311	2.63271	2.49769
2.17541	2.02063	2.6412	2.5348
2.21305	2.07297	2.64998	2.56648
2.24698	2.12106	2.65905	2.5931
2.27784	2.16513	2.66841	2.61529
2.30644	2.20527	2.67816	2.63526
2.33167	2.24196	2.68832	2.65421
2.35018	2.27555	2.69897	2.67127
2.36792	2.30657	2.71019	2.68727
2.3855	2.3355	2.72212	2.70285
2.40326	2.36107	2.73486	2.7179
2.42138	2.38625	2.74856	2.73276
2.43994	2.40482	2.76335	2.74809
2.45917	2.42251	2.7794	2.76468
2.47876	2.44015	2.79679	2.78134
2.49859	2.45895	2.81563	2.79764
2.51908	2.47864	2.83584	2.81324
2.54072	2.499	2.85724	2.82707
2.56379	2.52024	2.87952	2.84092
2.58834	2.54258	2.90238	2.85574
2.61456	2.56631	2.92547	2.87102
2.64245	2.59166	2.94848	2.88637
2.67179	2.61872	2.97118	2.90153
2.70302	2.64777	2.99343	2.9164
2.74279	2.67803	3.01533	2.93093
2.78298	2.709	3.0373	2.94509
2.82071	2.7407	3.06025	2.95888
2.856	2.77514	3.08486	2.97232
2.88973	2.81151	3.11119	2.98544
2.92316	2.85851	3.13871	2.99705
2.95693	2.90751	3.16682	3.00831
2.99151	2.95423	3.1951	3.01996
3.02697	2.99769	3.22309	3.03209
3.06251	3.03732	3.25078	3.0451
3.09736	3.07368	3.27429	3.05866
3.13075	3.10755	3.29529	3.07126
3.16241	3.13955	3.31476	3.08232
3.19923	3.17018	3.33308	3.0921
3.23618	3.19966	3.35019	3.10076
3.2725	3.22806	3.3484	3.10846
3.30632	3.25566	3.34334	3.11561
3.33541	3.28329	3.34085	3.12231
3.35727	3.31732	3.3382	3.1276
3.36854	3.35067	3.33587	3.12929
3.36837	3.38055	3.33239	3.12956
3.35933	3.40354	3.32758	3.12912
3.34363	3.41702	3.32098	3.12839
3.32194	3.41982	3.31275	3.12753
3.29399	3.4113	3.30298	3.12673
3.25956	3.39338	3.292	3.12603
3.21899	3.3685	3.28012	3.12548
3.17333	3.33853	3.26773	3.12504
3.12415	3.30435	3.25506	3.12466
3.07337	3.26581	3.24233	3.12425
3.02261	3.22327	3.22955	3.12397
2.97278	3.17693	3.21641	3.1241
2.92393	3.12711	3.20212	3.12485
2.87519	3.0739	3.18612	3.1263
2.8246	3.01744	3.1685	3.12846
2.76466	2.9578	3.14995	3.13128
2.70397	2.89422	3.13113	3.13494
2.64259	2.82874	3.11247	3.13926
2.58159	2.76311	3.09443	3.14403
2.52188	2.6927	3.07697	3.14857
2.46422	2.62464	3.06391	3.15277
2.40894	2.55906	3.05347	3.15726
2.35619	2.49672	3.0446	3.16227
2.30608	2.43709	3.03684	3.16771
2.25929	2.37991	3.03011	3.17336
2.21663	2.32496	3.04188	3.17898
2.17827	2.27178	3.05636	3.18406
2.14614	2.21925	3.06745	3.18848
2.12357	2.16695	3.07767	3.19262
2.11339	2.11575	3.0915	3.19815
2.11551	2.0671	3.10612	3.20424
2.1267	2.02315	3.12035	3.21084
2.14352	1.98677	3.134	3.21791
2.16417	1.95939	3.14716	3.22549
2.18817	1.94162	3.16011	3.23342
2.21542	1.93134	3.17292	3.24163
2.24549	1.92588	3.18577	3.24997
2.27802	1.92318	3.19865	3.25838
2.31227	1.92222	3.21162	3.2668
2.34694	1.92285	3.22468	3.27532
2.38116	1.92555	3.23774	3.28583
2.41406	1.9305	3.25079	3.29528
2.4452	1.93769	3.26377	3.3036
2.47485	1.94746	3.2767	3.31484
2.50435	1.95909	3.28949	3.32561
2.54098	1.9714	3.30212	3.33526
2.57655	1.9858	3.31456	3.34291
2.61152	2.00167	3.32682	3.34938
2.64529	2.01972	3.3388	3.35559
2.67777	2.04558	3.35332	3.36845
2.70869	2.07104	3.37263	3.381
2.73798	2.09491	3.39442	3.39358
2.76547	2.11564	3.41757	3.40613
2.79061	2.13319	3.4426	3.41858
2.81219	2.14753	3.46813	3.43139
2.82959	2.15914	3.49552	3.44495
2.84408	2.16855	3.52334	3.45913
2.85608	2.17644	3.54796	3.47551
2.86305	2.18342	3.56982	3.49463
2.86796	2.18996	3.58539	3.51677
2.87097	2.19628	3.59919	3.53943
2.87395	2.20253	3.61251	3.56107
2.87825	2.20875	3.6261	3.58094
2.88503	2.21505	3.64017	3.59875
2.89483	2.2215	3.65484	3.61456
2.90813	2.22817	3.67023	3.62858
2.92505	2.23519	3.68629	3.6412
2.94439	2.24273	3.70306	3.65267
2.96458	2.25108	3.72057	3.66318
2.98466	2.26052	3.73843	3.6728
3.0035	2.27126	3.75703	3.67942
3.02067	2.28332	3.77636	3.68585
3.0358	2.29645	3.79622	3.69195
3.05239	2.30954	3.8163	3.69359
3.0655	2.32236	3.83628	3.69416
3.07531	2.33572	3.85596	3.69419
3.08225	2.34949	3.87533	3.69402
3.08619	2.36245	3.89442	3.70009
3.08788	2.37233	3.91347	3.70793
3.08801	2.37853	3.92974	3.70648
3.08732	2.38238	3.94114	3.70355
3.08627	2.38501	3.95016	3.69906
3.08451	2.38706	3.9579	3.69343
3.08309	2.38888	3.96383	3.6872
3.08053	2.3905	3.9693	3.68037
3.07549	2.39183	3.97264	3.6729
3.06672	2.3928	3.97498	3.66507
3.05358	2.39345	3.98036	3.65525
3.03801	2.39379	3.98888	3.6428
3.01789	2.39377	3.99868	3.6273
2.9952	2.3933	4.01414	3.61109
2.96943	2.39229	4.02661	3.59557
2.94067	2.39092	4.04006	3.5814
2.90961	2.38942	4.05586	3.56874
2.87765	2.38791	4.07271	3.55762
2.84287	2.38643	4.08962	3.54767
2.80456	2.38491	4.10617	3.53851
2.76318	2.38317	4.12225	3.5299
2.71973	2.38087	4.13747	3.52179
2.67544	2.37765	4.15191	3.51419
2.63134	2.37325	4.16458	3.50708
2.58818	2.36761	4.17521	3.50052
2.5465	2.36063	4.18371	3.49472
2.50286	2.35234	4.19044	3.48982
2.46212	2.34298	4.19581	3.4853
2.42414	2.33253	4.20019	3.48168
2.38855	2.32067	4.20382	3.47912
2.35525	2.30801	4.20689	3.47049
2.32338	2.29548	4.20951	3.45968
2.29218	2.28369	4.21184	3.45135
2.26106	2.27297	4.21394	3.44502
2.22972	2.26346	4.21581	3.44029
2.1987	2.25513	4.21755	3.43682
2.16694	2.24792	4.21978	3.43436
2.13592	2.24178	4.22197	3.43265
2.10673	2.23646	4.22523	3.43148
2.08005	2.23192	4.22594	3.43071
2.05593	2.22812	4.22441	3.43024
2.03374	2.225	4.2206	3.43413
2.01289	2.22251	4.21531	3.43791
1.99317	2.22059	4.20436	3.44143
1.97489	2.21922	4.19678	3.44424
1.9584	2.216	4.18885	3.44671
1.94315	2.21173	4.17911	3.44983
1.92775	2.20677	4.16873	3.45305
1.91396	2.20227	4.15839	3.45638
1.90407	2.19845	4.14831	3.45978
1.89926	2.19531	4.13838	3.46426
1.8969	2.19756	4.12878	3.47077
1.89554	2.19923	4.11967	3.47766
1.89385	2.2009	4.11159	3.48479
1.89112	2.20276	4.1044	3.49118
1.887	2.20435	4.09678	3.49614
1.88171	2.20586	4.09142	3.49984
1.87577	2.2073	4.089	3.50301
1.86961	2.20835	4.08967	3.50526
1.8635	2.20913	4.09289	3.50648
1.85751	2.20923	4.098	3.50671
1.85172	2.20909	4.10419	3.50008
1.8462	2.20873	4.11088	3.48881
1.84101	2.20824	4.11754	3.47609
1.83615	2.20763	4.12384	3.46255
1.83158	2.20687	4.12952	3.44936
1.82736	2.20604	4.13393	3.43637
1.82347	2.20508	4.1376	3.4238
1.82005	2.20414	4.13973	3.4115
1.8173	2.20317	4.14426	3.39953
1.81531	2.20214	4.15056	3.38782
1.81424	2.20104	4.15822	3.37229
1.81417	2.19988	4.16688	3.35725
1.81482	2.19864	4.17621	3.3438
1.81556	2.19734	4.18567	3.32742
1.81591	2.19812	4.19524	3.31039
1.8146	2.19993	4.20609	3.29171
1.81108	2.20225	4.21777	3.27261
1.80655	2.20384	4.22996	3.25356
1.79971	2.2045	4.24267	3.23488
1.7903	2.20422	4.25568	3.21576
1.78179	2.19835	4.26875	3.19521
1.77609	2.19289	4.28153	3.17489
1.77519	2.18732	4.29364	3.15495
1.78085	2.18145	4.30437	3.1363
1.79348	2.17578	4.31565	3.11947
1.81141	2.17012	4.32407	3.10418
1.8326	2.1645	4.32845	3.09023
1.85497	2.15924	4.32833	3.07746
1.87706	2.15424	4.32444	3.06583
1.89795	2.14989	4.31774	3.05522
1.91704	2.1458	4.30938	3.05146
1.93406	2.14194	4.30007	3.05222
1.94895	2.13822	4.29033	3.05458
1.96184	2.13464	4.28044	3.05788
1.97294	2.13126	4.27077	3.06097
1.98251	2.12806	4.26145	3.06392
1.99077	2.12521	4.25255	3.06653
2.00548	2.1223	4.24407	3.06894
2.01951	2.11837	4.23604	3.07113
2.03122	2.11415	4.22847	3.07322
2.04249	2.10974	4.2213	3.07524
2.05304	2.10552	4.21433	3.07729
2.06339	2.10156	4.20731	3.07837
2.07355	2.09793	4.20036	3.08343
2.0835	2.09459	4.19335	3.08976
2.09418	2.09222	4.18506	3.09746
2.10614	2.09174	4.17608	3.1057
2.11793	2.09121	4.16686	3.11411
2.12864	2.09053	4.15751	3.12243
2.1367	2.08933	4.14823	3.1304
2.14028	2.08785	4.13924	3.13793
2.13825	2.0862	4.13077	3.14647
2.12999	2.08458	4.12312	3.15499
2.11573	2.08309	4.11718	3.16295
2.09756	2.08179	4.11247	3.16985
2.07895	2.08066	4.11066	3.17583
2.06271	2.07964	4.11152	3.18116
2.05085	2.07866	4.1137	3.18605
2.04401	2.07762	4.11679	3.19071
2.04178	2.07647	4.12029	3.19516
2.04332	2.07514	4.12376	3.19946
2.04779	2.07358	4.12705	3.20373
2.05448	2.07179	4.13013	3.20769
2.06283	2.06976	4.13311	3.21129
2.07237	2.06748	4.13593	3.21447
2.08269	2.06497	4.13867	3.22434
2.0923	2.06209	4.14139	3.22287
2.09313	2.0593	4.14428	3.22214
2.09332	2.05754	4.14733	3.18582
2.0954	2.05603	4.15047	3.15098
2.09816	2.05467	4.1536	3.11537
2.10221	2.05308	4.15259	3.08363
2.10703	2.05886	4.14837	3.05554
2.11238	2.06559	4.14396	3.02652
2.11782	2.07001	4.14048	3.00253
2.12321	2.07209	4.13766	2.98486
2.12852	2.07121	4.13562	2.97113
2.13391	2.06942	4.13408	2.95978
2.13973	2.0671	4.13262	2.95003
2.14665	2.06479	4.13059	2.93467
2.15556	2.06249	4.12776	2.92558
2.16687	2.06022	4.12418	2.91829
2.18023	2.05785	4.11829	2.91238
2.19421	2.05531	4.10793	2.90753
2.20654	2.05251	4.09689	2.90153
2.21516	2.04939	4.0954	2.89551
2.21875	2.04594	4.0923	2.88891
2.21691	2.0422	4.09027	2.88235
2.1883	2.03825	4.08825	2.87588
2.1618	2.03409	4.08664	2.86865
2.13354	2.0298	4.08537	2.8622
2.10685	2.02543	4.0845	2.85692
2.08203	2.02104	4.08406	2.85303
2.05946	2.01668	4.08398	2.85051
2.03883	2.01238	4.08422	2.84924
2.00473	2.00819	4.08471	2.84192
1.97197	2.00411	4.08546	2.84638
1.9408	2.00017	4.08635	2.85033
1.912	1.99638	4.08745	2.8987
1.88606	1.99272	4.08879	2.94742
1.85882	1.98916	4.09039	2.9988
1.84259	1.98566	4.09634	3.0488
1.82852	1.97456	4.10565	3.09476
1.81541	1.96225	4.11521	3.14028
1.80157	1.95205	4.12338	3.17824
1.78693	1.94331	4.13072	3.20722
1.77138	1.93576	4.13705	3.2285
1.75513	1.92927	4.14246	3.24704
1.73843	1.92357	4.14722	3.26312
1.7216	1.91846	4.1519	3.28436
1.70486	1.91368	4.15683	3.29853
1.68842	1.9091	4.16211	3.30917
1.67236	1.90461	4.16947	3.3178
1.65666	1.90019	4.18131	3.32568
1.64133	1.89587	4.19425	3.33557
1.62645	1.8917	4.19684	3.34637
1.61209	1.88776	4.2006	3.35834
1.59828	1.88407	4.20427	3.37068
1.60685	1.85828	4.20891	3.39073
1.61001	1.83586	4.21401	3.40807
1.61284	1.81473	4.21943	3.42502
1.61306	1.79686	4.22502	3.44298
1.61115	1.78231	4.23066	3.46166
1.60726	1.77133	4.2324	3.48127
1.60209	1.74708	4.23638	3.50116
1.61128	1.72411	4.24015	3.52114
1.62132	1.7031	4.2469	3.54131
1.63223	1.68526	4.25528	3.56125
1.64233	1.66663	4.26513	3.57152
1.65044	1.65728	4.27539	3.57839
1.66022	1.65219	4.2858	3.58247
1.65895	1.64875	4.29584	3.58293
1.65549	1.64567	4.30537	3.58254
1.65105	1.6423	4.31371	3.58266
1.64738	1.63855	4.32158	3.58581
1.64447	1.63449	4.32857	3.592
1.64238	1.63032	4.33461	3.60173
1.64088	1.62615	4.33978	3.61085
1.63977	1.6221	4.34428	3.61934
1.63885	1.61825	4.34824	3.62654
1.638	1.61464	4.35178	3.6328
1.63712	1.61123	4.35498	3.63764
1.63615	1.60786	4.3579	3.64124
1.63509	1.60429	4.36054	3.64348
1.63396	1.60024	4.36269	3.64457
1.63271	1.59535	4.36465	3.64459
1.63132	1.58923	4.36672	3.64378
1.62982	1.58159	4.369	3.64223
1.6282	1.59167	4.37157	3.63241
1.62645	1.5979	4.37453	3.62558
1.62472	1.6022	4.37794	3.61798
1.62299	1.60373	4.38171	3.60797
1.6213	1.60305	4.38572	3.59572
1.61966	1.60014	4.39371	3.58119
1.61809	1.61177	4.39946	3.56524
1.61659	1.6232	4.40526	3.5483
1.61517	1.63354	4.40806	3.53054
1.6138	1.64141	4.40924	3.5126
1.61248	1.65058	4.40865	3.49538
1.61123	1.65087	4.40739	3.47961
1.61005	1.64719	4.40518	3.46469
1.609	1.64213	4.40199	3.45088
1.608	1.63693	4.39812	3.43249
1.60705	1.63225	4.39393	3.41873
1.60613	1.62814	4.38868	3.40341
1.60521	1.6245	4.37077	3.38851
1.60429	1.62112	4.35693	3.3739
1.60336	1.61787	4.34678	3.36046
1.60243	1.61463	4.34044	3.34859
1.60147	1.61132	4.33886	3.33829
1.60051	1.60789	4.34084	3.32975
1.59955	1.60438	4.34562	3.32282
1.59861	1.60036	4.3522	3.31722
1.59767	1.59748	4.36058	3.31265
1.59672	1.59655	4.37001	3.30873
1.59576	1.59651	4.37954	3.3051
1.59483	1.59763	4.38891	3.30132
1.59393	1.59995	4.39766	3.29719
1.59307	1.6067	4.40547	3.29275
1.59226	1.61402	4.41206	3.28816
1.59148	1.62218	4.4173	3.2837
1.59073	1.63006	4.42118	3.2795
1.58418	1.63706	4.42375	3.27568
1.58224	1.64295	4.42533	3.27227
1.58369	1.64777	4.42604	3.26924
1.58553	1.6517	4.42103	3.26648
1.58745	1.655	4.41008	3.2635
1.58871	1.65791	4.3944	3.26131
1.58953	1.66065	4.37819	3.26037
1.58673	1.66334	4.36198	3.25958
1.58299	1.66607	4.34634	3.25838
1.57919	1.66888	4.34689	3.25605
1.5758	1.67174	4.36425	3.2582
1.57271	1.6746	4.39319	3.25529
1.56999	1.67744	4.42711	3.25256
1.56755	1.68027	4.47246	3.24855
1.56533	1.68307	4.51406	3.24434
1.56324	1.68582	4.55431	3.23979
1.56122	1.68849	4.59446	3.23499
1.55921	1.69108	4.63074	3.23008
1.55718	1.69358	4.66283	3.2247
1.55509	1.69601	4.69106	3.21876
1.55297	1.69895	4.69781	3.21221
1.55082	1.701	4.70536	3.20506
1.54864	1.70163	4.70325	3.19746
1.54643	1.7023	4.70128	3.1896
1.54419	1.70312	4.69849	3.18188
1.54192	1.70441	4.6987	3.17457
1.53963	1.70607	4.66901	3.16771
1.53732	1.70814	4.64305	3.16098
1.535	1.71055	4.62557	3.15438
1.53269	1.71325	4.61833	3.14783
1.53618	1.71619	4.61905	3.14129
1.53506	1.7194	4.6317	3.13472
1.53057	1.72292	4.65102	3.12821
1.52567	1.72675	4.6794	3.12182
1.52069	1.73093	4.71442	3.11598
1.51639	1.73554	4.75309	3.10954
1.51253	1.74049	4.79069	3.10191
1.51229	1.74561	4.82602	3.09402
1.51297	1.75071	4.85831	3.0863
1.5137	1.75561	4.87233	3.07936
1.514	1.76021	4.86703	3.07338
1.51399	1.76442	4.84809	3.06839
1.51362	1.7682	4.8228	3.06413
1.513	1.77155	4.79652	3.06032
1.51217	1.77448	4.7681	3.05711
1.51125	1.77705	4.73611	3.05497
1.51028	1.7793	4.69955	3.05492
1.50932	1.78129	4.66239	3.05803
1.50841	1.78305	4.62659	3.06425
1.50757	1.7846	4.59241	3.07264
1.50677	1.78599	4.57831	3.08221
1.50604	1.78723	4.56178	3.09215
1.50539	1.78833	4.55387	3.10185
1.50483	1.7893	4.54551	3.11092
1.50435	1.7901	4.53786	3.11911
1.50386	1.79075	4.52743	3.12625
1.50327	1.7912	4.54739	3.13233
1.50256	1.79145	4.56431	3.13759
1.50178	1.79147	4.57369	3.14191
1.50087	1.79125	4.57393	3.14539
1.49988	1.79079	4.56738	3.14806
1.4989	1.79001	4.54994	3.15001
1.49799	1.78888	4.52677	3.15132
1.49718	1.78731	4.50046	3.15017
1.49651	1.78523	4.47338	3.14723
1.49596	1.78253	4.44721	3.14185
1.49551	1.77922	4.42259	3.13617
1.49516	1.77543	4.4003	3.12981
1.49488	1.77134	4.38111	3.12427
1.49466	1.76711	4.36505	3.11934
1.49447	1.76286	4.35229	3.11454
1.49432	1.7587	4.34278	3.10937
1.49417	1.75469	4.33625	3.1036
1.49404	1.75085	4.33249	3.09721
1.49393	1.74717	4.33119	3.09022
1.49382	1.74366	4.33179	3.08259
1.49373	1.74029	4.33388	3.07353
1.49365	1.73705	4.33629	3.06251
1.4936	1.73394	4.3385	3.0501
1.49356	1.73094	4.34059	3.03708
1.49354	1.72805	4.34266	3.0243
1.49354	1.72524	4.34486	3.01225
1.49355	1.72252	4.34724	3.0012
1.49357	1.71988	4.34986	2.99131
1.49361	1.71733	4.35276	2.98259
1.49374	1.71484	4.35607	2.97487
1.49405	1.71241	4.35983	2.96799
1.49454	1.71002	4.36408	2.9618
1.49515	1.70766	4.36867	2.95614
1.49594	1.70533	4.37345	2.95088
1.49684	1.70304	4.37821	2.94593
1.49776	1.70079	4.38278	2.94119
1.49865	1.69859	4.38702	2.93652
1.49945	1.69647	4.39085	2.93374
1.50016	1.69437	4.39425	2.93225
1.50077	1.69227	4.39725	2.93282
1.50131	1.69017	4.39998	2.93348
1.50178	1.6881	4.4023	2.9348
1.50222	1.68607	4.40419	2.93543
1.50263	1.68412	4.40583	2.93572
1.50305	1.68226	4.4074	2.93618
1.50346	1.68051	4.40883	2.93727
1.5039	1.67885	4.41015	2.93911
1.50434	1.6773	4.41125	2.94153
1.5048	1.67601	4.41196	2.94409
1.50527	1.67531	4.41216	2.94633
1.50574	1.67605	4.41175	2.94805
1.50622	1.67816	4.4139	2.94874
1.50668	1.68027	4.41648	2.94809
1.50715	1.68212	4.4141	2.94642
1.5076	1.68358	4.41045	2.94394
1.50803	1.68468	4.40529	2.94103
1.50845	1.68545	4.39928	2.93798
1.50886	1.68597	4.39295	2.93496
1.50925	1.68628	4.38659	2.93208
1.50963	1.68645	4.37998	2.92948
1.50999	1.68653	4.37274	2.92724
1.51033	1.68656	4.36447	2.92539
1.51066	1.68659	4.3549	2.92395
1.51097	1.68662	4.34371	2.9229
1.51126	1.68667	4.33082	2.92219
1.51152	1.68676	4.3161	2.92136
1.51176	1.68689	4.29954	2.91996
1.51197	1.68705	4.28111	2.91761
1.51215	1.68724	4.26078	2.91456
1.51231	1.68747	4.23852	2.91042
1.51243	1.68773	4.21429	2.90469
1.51253	1.68802	4.1881	2.89691
1.5126	1.68833	4.16005	2.88695
1.51263	1.68867	4.13031	2.87515
1.51264	1.68902	4.09915	2.86223
1.51262	1.68938	4.06688	2.84894
1.51257	1.68976	4.03377	2.83591
1.5125	1.69337	4.00006	2.82352
1.51239	1.69884	3.96603	2.81201
1.51226	1.70464	3.93203	2.8014
1.51211	1.70896	3.89858	2.79155
1.51193	1.71126	3.8631	2.7824
1.51173	1.71269	3.82831	2.77364
1.51151	1.71349	3.7999	2.76505
1.51127	1.71386	3.77415	2.75648
1.51101	1.7139	3.75123	2.7478
1.51074	1.71372	3.73031	2.73911
1.51046	1.71336	3.71062	2.73067
1.51017	1.71289	3.69155	2.72287
1.50987	1.71234	3.67291	2.71603
1.50956	1.71173	3.65479	2.7103
1.50924	1.71106	3.63752	2.70557
1.50891	1.71033	3.62069	2.70161
1.50858	1.70954	3.60098	2.69824
1.50824	1.70871	3.58588	2.69532
1.5079	1.70784	3.57055	2.69314
1.50754	1.70692	3.55657	2.67428
1.50719	1.70596	3.54515	2.64914
1.50682	1.70496	3.53665	2.63061
1.50644	1.70391	3.53096	2.61748
1.50606	1.70283	3.52744	2.60981
1.50566	1.70171	3.52553	2.60591
1.50525	1.70056	3.52614	2.60507
1.50483	1.69938	3.52921	2.60591
1.5044	1.69818	3.5344	2.60734
1.50395	1.69695	3.54112	2.61426
1.50348	1.69571	3.54886	2.61401
1.50299	1.69125	3.55713	2.60847
1.50249	1.68477	3.56569	2.60015
1.50197	1.67748	3.57417	2.59056
1.50142	1.67036	3.58215	2.58136
1.50086	1.66397	3.58907	2.57275
1.50028	1.65854	3.59447	2.56506
1.49967	1.65406	3.59816	2.55815
1.49905	1.65047	3.60024	2.55187
1.49841	1.64762	3.60082	2.54589
1.49775	1.64536	3.60015	2.53968
1.49707	1.64356	3.59848	2.53253
1.49637	1.6421	3.59615	2.52372
1.49565	1.64089	3.59351	2.5128
1.49492	1.63986	3.59078	2.49964
1.49418	1.63897	3.58804	2.48452
1.49342	1.63819	3.58598	2.4678
1.49265	1.6375	3.58813	2.44984
1.49186	1.63687	3.5869	2.43103
1.49107	1.6363	3.58794	2.41173
1.49026	1.63579	3.58996	2.40911
1.48944	1.63533	3.59165	2.41247
1.48861	1.63494	3.59247	2.4109
1.48777	1.63461	3.59252	2.40632
1.48693	1.63434	3.59235	2.39904
1.48607	1.63414	3.59257	2.39237
1.48521	1.63401	3.5897	2.39607
1.48434	1.63394	3.5845	2.40302
1.48347	1.63394	3.57895	2.40938
1.48259	1.634	3.57361	2.40967
1.4817	1.63411	3.53461	2.41575
1.48082	1.63429	3.49557	2.42553
1.47993	1.63453	3.46286	2.43679
1.47903	1.63482	3.43386	2.44986
1.47814	1.63518	3.40859	2.46438
1.47724	1.63559	3.38678	2.47896
1.47634	1.63605	3.36793	2.49183
1.47544	1.63656	3.35213	2.50251
1.47454	1.63711	3.33896	2.51111
1.47364	1.63771	3.32831	2.51816
1.47274	1.63836	3.31778	2.5251
1.47185	1.63903	3.30695	2.52998
1.47096	1.63974	3.29692	2.5344
1.47007	1.64049	3.2888	2.53935
1.46918	1.64126	3.28368	2.54556
1.4683	1.64205	3.2832	2.55307
1.46742	1.64287	3.28853	2.56191
1.46655	1.64371	3.29922	2.5719
1.46567	1.64456	3.31409	2.58288
1.46481	1.64543	3.33092	2.59462
1.46394	1.6463	3.34806	2.61247
1.46308	1.64719	3.36474	2.62684
1.46222	1.64807	3.3808	2.6405
1.46136	1.64895	3.3962	2.65325
1.4605	1.64983	3.41142	2.66555
1.45964	1.65071	3.42617	2.67599
1.45878	1.65157	3.44317	2.67541
1.45791	1.65242	3.46162	2.67169
1.45705	1.65325	3.47959	2.66886
1.45618	1.65408	3.48872	2.66665
1.4553	1.65489	3.52901	2.6651
1.45441	1.65568	3.57081	2.66388
1.45352	1.65645	3.60701	2.6623
1.45262	1.65719	3.64115	2.65834
1.45171	1.6579	3.67262	2.65077
1.4508	1.65858	3.70199	2.64102
1.44987	1.65924	3.72926	2.63092
1.44892	1.65986	3.7543	2.60298
1.44795	1.66046	3.7771	2.58489
1.44696	1.66102	3.79324	2.57011
1.44593	1.66155	3.81509	2.55814
1.44487	1.66206	3.84243	2.55037
1.44377	1.66253	3.86955	2.54587
1.44263	1.66297	3.89491	2.54318
1.44146	1.66338	3.91308	2.54128
1.44024	1.66376	3.92573	2.53945
1.439	1.66411	3.93188	2.53721
1.43772	1.66442	3.93342	2.53428
1.43642	1.6647	3.93131	2.52909
1.43509	1.66495	3.92725	2.52296
1.43375	1.66517	3.92366	2.51122
1.43237	1.66535	3.91926	2.50429
1.431	1.66551	3.91458	2.49713
1.42963	1.66564	3.9094	2.48957
1.42826	1.66574	3.90352	2.48129
1.42687	1.66581	3.89713	2.47259
1.42548	1.66586	3.88975	2.46338
1.42414	1.66588	3.88145	2.45428
1.42286	1.66588	3.87247	2.44557
1.42165	1.66586	3.87115	2.43745
1.42049	1.66581	3.87174	2.43008
1.41937	1.66574	3.87063	2.42367
1.41827	1.66566	3.86858	2.41838
1.41717	1.66555	3.86475	2.41438
1.41603	1.66543	3.85967	2.41181
1.41486	1.66529	3.853	2.41081
1.41367	1.66513	3.84517	2.41144
1.41248	1.66495	3.83614	2.43223
1.41131	1.66477	3.82629	2.44553
1.41019	1.66456	3.82016	2.45745
1.40914	1.66435	3.80505	2.46723
1.4082	1.66413	3.7885	2.48607
1.40738	1.66389	3.7723	2.49832
1.40669	1.66365	3.75655	2.50766
1.40614	1.66339	3.74333	2.51523
1.40575	1.66313	3.72948	2.52243
1.40552	1.66287	3.71511	2.52981
1.40542	1.66259	3.69995	2.53795
1.40551	1.66231	3.68472	2.5481
1.40573	1.66203	3.67394	2.55931
1.40611	1.66174	3.665	2.57149
1.40665	1.66145	3.6563	2.5842
1.40732	1.66115	3.64516	2.59727
1.40812	1.66086	3.6329	2.6106
1.40904	1.66056	3.61972	2.62414
1.41011	1.66025	3.60676	2.6378
1.41129	1.65995	3.58436	2.65182
1.41256	1.65964	3.56058	2.66575
1.41389	1.65934	3.53562	2.67941
1.41528	1.65903	3.51185	2.6927
1.41675	1.65872	3.48799	2.70553
1.4183	1.65842	3.46438	2.71786
1.41996	1.65811	3.44152	2.7297
1.42175	1.65782	3.41956	2.741
1.42372	1.65753	3.39925	2.75165
1.42586	1.65724	3.38076	2.76141
1.42816	1.65697	3.36393	2.77002
1.43062	1.65671	3.34853	2.77716
1.43321	1.65647	3.33423	2.78285
1.43591	1.65624	3.32084	2.78725
1.43869	1.65604	3.31077	2.79045
1.44151	1.65585	3.29707	2.78213
1.44437	1.65568	3.28282	2.77742
1.44728	1.65553	3.26796	2.77328
1.45025	1.65541	3.25459	2.76893
1.45325	1.6553	3.2424	2.7631
1.45626	1.65521	3.23105	2.75606
1.45923	1.65514	3.21959	2.7475
1.46215	1.65509	3.20777	2.74125
1.46504	1.65506	3.19107	2.7233
1.46794	1.65504	3.1711	2.70552
1.47083	1.65504	3.1467	2.68602
1.47368	1.65505	3.12196	2.66663
1.47646	1.65508	3.09937	2.64761
1.47917	1.65512	3.08416	2.62896
1.48184	1.65518	3.07405	2.61067
1.48446	1.65524	3.07818	2.59254
1.48702	1.65531	3.08589	2.57456
1.48948	1.6554	3.09364	2.55672
1.49184	1.65549	3.09915	2.53892
1.49413	1.65559	3.10388	2.52108
1.49636	1.65571	3.11083	2.50845
1.49851	1.65582	3.11762	2.49631
1.50056	1.65595	3.12264	2.48296
1.5025	1.65608	3.12694	2.46883
1.5043	1.65621	3.12983	2.45415
1.50596	1.65634	3.13129	2.43917
1.50752	1.65648	3.13134	2.42405
1.50898	1.65661	3.13003	2.40899
1.51033	1.65674	3.12751	2.39414
1.51156	1.65686	3.12398	2.37972
1.5127	1.65697	3.11955	2.36588
1.51373	1.65708	3.11391	2.35279
1.51459	1.65718	3.10756	2.34043
1.51529	1.65727	3.10069	2.3287
1.5158	1.65735	3.09352	2.31809
1.51616	1.65743	3.08613	2.30807
1.51645	1.6575	3.07847	2.2987
1.51668	1.65756	3.07059	2.2864
1.51681	1.65762	3.06245	2.28485
1.51682	1.65768	3.05412	2.28235
1.51669	1.65773	3.05061	2.28101
1.51646	1.65778	3.05048	2.27919
1.51616	1.65783	3.05025	2.27654
1.51581	1.65788	3.04436	2.27307
1.51535	1.65793	3.03403	2.26893
1.51481	1.65798	3.01992	2.26438
1.51425	1.65803	3.00428	2.25959
1.5137	1.65808	2.98986	2.25465
1.51314	1.65814	2.97639	2.24969
1.51252	1.6582	2.96387	2.24496
1.51183	1.65826	2.94875	2.23518
1.5111	1.65832	2.93297	2.22466
1.51033	1.65838	2.91826	2.21551
1.50952	1.65844	2.90294	2.20747
1.5087	1.65851	2.88779	2.19998
1.50785	1.65856	2.87307	2.19303
1.5069	1.65862	2.85912	2.18648
1.50586	1.65867	2.84618	2.1803
1.50479	1.65873	2.83429	2.17449
1.5037	1.6588	2.8231	2.16886
1.5026	1.65887	2.81289	2.16347
1.50149	1.65895	2.80339	2.15833
1.50035	1.65904	2.79451	2.15349
1.49922	1.65914	2.78606	2.14896
1.49811	1.65925	2.77793	2.14468
1.49701	1.65938	2.77001	2.14067
1.49589	1.65952	2.76227	2.13689
1.49475	1.65968	2.75468	2.13332
1.49362	1.65984	2.74724	2.12993
1.4925	1.66002	2.73992	2.12672
1.49142	1.66021	2.73275	2.12372
1.49038	1.6604	2.72569	2.12089
1.48935	1.6606	2.71876	2.11824
1.48835	1.66081	2.71196	2.1157
1.48744	1.66102	2.70529	2.11314
1.48662	1.66123	2.69883	2.11049
1.48582	1.66145	2.69277	2.10768
1.48503	1.66166	2.68742	2.10472
1.48426	1.66187	2.68272	2.10162
1.48355	1.66207	2.6783	2.0983
1.48294	1.66227	2.6743	2.09485
1.48242	1.66247	2.67065	2.09175
1.48195	1.66266	2.66711	2.08863
1.48155	1.66284	2.6636	2.08543
1.48122	1.66302	2.6599	2.08255
1.481	1.6632	2.65595	2.07983
1.4809	1.66336	2.65158	2.07734
1.48093	1.66352	2.64682	2.075
1.48103	1.66367	2.64161	2.07279
1.4812	1.6638	2.63641	2.07088
1.48144	1.66392	2.63086	2.06926
1.48175	1.66402	2.62523	2.06796
1.48213	1.66411	2.61953	2.06698
1.48258	1.66417	2.61392	2.06631
1.48309	1.6642	2.60846	2.06587
1.48365	1.66422	2.60322	2.0656
1.48427	1.66421	2.59821	2.06549
1.48493	1.66418	2.59344	2.06565
1.48562	1.66412	2.58886	2.06612
1.48634	1.66404	2.58446	2.06688
1.48706	1.66395	2.58017	2.06783
1.48781	1.66384	2.57593	2.069
1.48859	1.66371	2.57168	2.07043
1.48938	1.66356	2.56738	2.07212
1.49013	1.6634	2.56299	2.07405
1.49084	1.66323	2.5585	2.07623
1.49155	1.66306	2.55388	2.07865
1.49227	1.66287	2.5491	2.08132
1.49296	1.66268	2.54416	2.08423
1.49359	1.66248	2.53904	2.08738
1.49412	1.66229	2.53383	2.09073
1.49459	1.66209	2.52845	2.09423
1.49503	1.66189	2.52295	2.09786
1.49545	1.66169	2.51734	2.10153
1.49587	1.66149	2.51162	2.10517
1.49627	1.66129	2.5058	2.10872
1.49658	1.6611	2.49989	2.11215
1.49681	1.6609	2.49388	2.11556
1.49696	1.66071	2.4878	2.11899
1.49705	1.66052	2.48164	2.12243
1.49711	1.66032	2.47538	2.1258
1.49714	1.66013	2.46904	2.12894
1.49709	1.65995	2.46261	2.13173
1.49696	1.65976	2.4561	2.13409
1.49677	1.65957	2.44949	2.13604
1.49653	1.65939	2.44284	2.1376
1.49628	1.6592	2.43602	2.13878
1.49601	1.65902	2.42714	2.13947
1.49567	1.65884	2.41685	2.13966
1.49528	1.65866	2.40631	2.13939
1.49484	1.65849	2.39602	2.13873
1.49436	1.65831	2.38608	2.13778
1.49387	1.65813	2.37643	2.13661
1.49339	1.65796	2.36697	2.13527
1.49292	1.65778	2.35753	2.13379
1.4924	1.65761	2.34811	2.13216
1.49182	1.65743	2.33865	2.13036
1.4912	1.65726	2.32921	2.12836
1.49058	1.65708	2.31976	2.12613
1.48999	1.6569	2.31032	2.12361
1.48941	1.65672	2.30079	2.12078
1.48884	1.65653	2.29122	2.1176
1.48831	1.65635	2.28156	2.11409
1.48778	1.65616	2.27177	2.11025
1.48719	1.65597	2.26179	2.10612
1.48656	1.65578	2.25156	2.10185
1.48592	1.65559	2.24107	2.09746
1.48529	1.65539	2.23035	2.09291
1.48469	1.6552	2.21536	2.08815
1.48409	1.655	2.19573	2.08312
1.48349	1.65479	2.17292	2.07818
1.48289	1.65458	2.1499	2.07355
1.4823	1.65435	2.12964	2.0692
1.4817	1.65411	2.112	2.06502
1.4811	1.65386	2.09638	2.06089
1.48048	1.65359	2.08207	2.05678
1.47983	1.65329	2.06868	2.05267
1.47919	1.65297	2.05779	2.04858
1.47858	1.65262	2.04849	2.04449
1.47797	1.65224	2.03938	2.0404
1.47734	1.65182	2.02986	2.03633
1.47669	1.65136	2.01972	2.0323
1.47605	1.65086	2.00903	2.02829
1.47537	1.65032	1.99789	2.02428
1.47463	1.64974	1.98647	2.02028
1.47386	1.64911	1.97485	2.01628
1.4731	1.64843	1.96313	2.0123
1.47235	1.6477	1.95139	2.00837
1.47162	1.64693	1.9397	2.00451
1.47088	1.64611	1.92811	2.00074
1.4701	1.64524	1.91667	2.01271
1.46925	1.64432	1.90543	2.02478
1.46835	1.64335	1.89367	2.03022
1.46745	1.64233	1.88229	2.03283
1.46658	1.64127	1.87149	2.03379
1.46573	1.64016	1.8613	2.03447
1.46486	1.639	1.85166	2.03525
1.46398	1.63779	1.84251	2.03621
1.4631	1.63654	1.83783	2.0371
1.46224	1.63524	1.83798	2.03794
1.46133	1.6339	1.84049	2.03849
1.46037	1.63252	1.84357	2.03869
1.45941	1.6311	1.84436	2.03874
1.45848	1.62964	1.84295	2.03891
1.45759	1.62814	1.83981	2.03943
1.45672	1.6266	1.83552	2.04041
1.45585	1.62503	1.8305	2.04185
1.45492	1.62342	1.82505	2.04372
1.45393	1.62176	1.81944	2.04606
1.45293	1.62006	1.81391	2.04886
1.45196	1.61832	1.80862	2.05206
1.45102	1.61653	1.80366	2.05552
1.45005	1.61469	1.79912	2.05891
1.44907	1.61281	1.79502	2.06239
1.4481	1.61087	1.79135	2.06599
1.44715	1.60888	1.78811	2.06979
1.44618	1.60683	1.78526	2.0738
1.44513	1.60474	1.78278	2.07799
1.44403	1.60259	1.78063	2.09621
1.44292	1.60038	1.77881	2.10742
1.44186	1.59813	1.77731	2.10651
1.44084	1.59582	1.77611	2.10553
1.43983	1.59346	1.77597	2.11221
1.43878	1.59104	1.776	2.1215
1.43769	1.58858	1.77606	2.13189
1.43659	1.58606	1.77616	2.14172
1.4355	1.5835	1.77634	2.15054
1.43442	1.58088	1.77664	2.15268
1.43332	1.57823	1.77708	2.15386
1.43217	1.57553	1.77768	2.15538
1.43097	1.57278	1.77941	2.15715
1.42977	1.57	1.78111	2.15909
1.42859	1.56719	1.78264	2.16118
1.4274	1.56433	1.78404	2.16352
1.42618	1.56145	1.78542	2.16564
1.42493	1.55855	1.7869	2.16744
1.42364	1.55563	1.78853	2.16926
1.42232	1.5527	1.79033	2.17093
1.42098	1.54976	1.79232	2.17252
1.41961	1.54682	1.79449	2.17382
1.41817	1.54389	1.79683	2.175
1.41664	1.54096	1.7993	2.17304
1.41503	1.53806	1.80189	2.16951
1.41334	1.53518	1.80457	2.16503
1.41159	1.53233	1.80732	2.1605
1.40976	1.52951	1.81011	2.15587
1.40787	1.52673	1.81293	2.15304
1.40596	1.52399	1.81573	2.15209
1.40399	1.52129	1.81849	2.13813
1.40193	1.51863	1.8212	2.13257
1.39978	1.51602	1.82381	2.12415
1.39755	1.51346	1.82633	2.11645
1.39525	1.51094	1.82872	2.10832
1.39289	1.50847	1.83099	2.10115
1.39047	1.50606	1.83314	2.09511
1.388	1.50369	1.83515	2.0904
1.38549	1.50137	1.83705	2.08692
1.38294	1.4991	1.83884	2.09024
1.38034	1.49688	1.84053	2.09488
1.37772	1.49471	1.84211	2.09953
1.37511	1.49259	1.84361	2.10419
1.37248	1.49052	1.84503	2.1088
1.36981	1.4885	1.84637	2.11328
1.36709	1.48652	1.84766	2.11745
1.36434	1.4846	1.8489	2.12171
1.36157	1.48273	1.8501	2.12611
1.3588	1.48091	1.85126	2.13037
1.35604	1.47913	1.85237	2.13467
1.35328	1.4774	1.85344	2.13894
1.35055	1.47572	1.85446	2.14339
1.34784	1.4741	1.8554	2.14793
1.34516	1.47252	1.85627	2.15568
1.34251	1.47099	1.85705	2.16544
1.33989	1.4695	1.85773	2.17644
1.33729	1.46669	1.85829	2.18774
1.33472	1.46214	1.85874	2.1993
1.33217	1.45572	1.85907	2.20918
1.32964	1.44791	1.85927	2.21728
1.32711	1.43972	1.85936	2.22459
1.32459	1.43228	1.85934	2.23074
1.32205	1.42603	1.85922	2.2364
1.3195	1.42092	1.85902	2.2416
1.31691	1.41673	1.85874	2.24644
1.3143	1.4132	1.8584	2.25081
1.31164	1.41013	1.85801	2.25485
1.30893	1.40733	1.85756	2.25854
1.30617	1.40468	1.85704	2.26199
1.30337	1.4021	1.85645	2.26522
1.30052	1.39947	1.85577	2.26826
1.29764	1.39665	1.855	2.27112
1.29473	1.39352	1.85415	2.27387
1.29181	1.38996	1.8525	2.27651
1.28889	1.38581	1.85109	2.27905
1.28598	1.38097	1.85123	2.2795
1.2831	1.37531	1.85309	2.28101
1.28027	1.36864	1.85636	2.28315
1.27748	1.36085	1.86027	2.28548
1.27475	1.35199	1.86411	2.2877
1.2721	1.34233	1.86723	2.28972
1.26953	1.33221	1.8693	2.29154
1.26703	1.32201	1.87034	2.29313
1.26463	1.31201	1.87067	2.29454
1.26232	1.30242	1.87051	2.29573
1.26011	1.29334	1.87013	2.29672
1.258	1.28614	1.86969	2.2975
1.25599	1.28121	1.86925	2.29811
1.25409	1.27862	1.86886	2.29854
1.2523	1.27782	1.86853	2.29881
1.25062	1.27772	1.86827	2.29895
1.24906	1.27712	1.86804	2.29898
1.24762	1.27555	1.86779	2.29894
1.24631	1.27306	1.8675	2.29884
1.24512	1.26984	1.86714	2.29869
1.24406	1.26619	1.8667	2.2985
1.24313	1.26236	1.86615	2.29824
1.24232	1.25855	1.86522	2.29787
1.24164	1.25492	1.86426	2.29746
1.24108	1.25163	1.86344	2.29708
1.24063	1.2488	1.86276	2.2968
1.24028	1.24659	1.8622	2.29662
1.24003	1.24518	1.86171	2.29647
1.23987	1.24471	1.86195	2.29613
1.23979	1.24532	1.86183	2.29583
1.2398	1.24714	1.86002	2.29857
1.23988	1.25031	1.8563	2.3015
1.24005	1.255	1.85097	2.3047
1.2403	1.26135	1.84479	2.30797
1.24064	1.26929	1.83818	2.31138
1.24108	1.27856	1.83182	2.31479
1.24162	1.28883	1.82614	2.31806
1.24228	1.29969	1.82118	2.32113
1.24305	1.31088	1.81667	2.32393
1.24394	1.32221	1.81236	2.32644
1.24497	1.33357	1.80782	2.32866
1.24613	1.34494	1.8026	2.3306
1.24744	1.35632	1.79642	2.33227
1.24891	1.36779	1.78925	2.33369
1.25055	1.37943	1.78145	2.33487
1.25235	1.39129	1.77336	2.33563
1.25435	1.40339	1.76523	2.33597
1.25653	1.41576	1.75726	2.33617
1.25892	1.42839	1.74952	2.33618
1.26152	1.44125	1.74201	2.33598
1.26435	1.45429	1.7347	2.33556
1.2674	1.46747	1.72755	2.33496
1.2707	1.48072	1.72075	2.33421
1.27423	1.494	1.71384	2.33327
1.27802	1.50726	1.70668	2.33206
1.28204	1.52046	1.69935	2.33053
1.28628	1.53355	1.69197	2.32869
1.29073	1.54652	1.68462	2.32659
1.29539	1.55934	1.67711	2.32445
1.30026	1.57199	1.66898	2.32211
1.30533	1.58447	1.6598	2.31852
1.31058	1.59677	1.64928	2.31347
1.31598	1.6089	1.63737	2.30734
1.3215	1.62083	1.62723	2.30074
1.32713	1.63257	1.61896	2.29388
1.33283	1.64408	1.61151	2.28701
1.33857	1.65537	1.60386	2.27958
1.34434	1.6664	1.59598	2.27295
1.3501	1.67716	1.58784	2.26766
1.35585	1.68762	1.57991	2.26307
1.36156	1.69777	1.57242	2.25885
1.36722	1.70757	1.56569	2.25462
1.37281	1.71703	1.55977	2.25039
1.37832	1.72612	1.5517	2.24609
1.38373	1.73482	1.5446	2.24177
1.38902	1.74313	1.53823	2.2377
1.39419	1.75105	1.53222	2.23381
1.3992	1.75858	1.5265	2.2298
1.40405	1.76574	1.52131	2.22565
1.40872	1.77254	1.51668	2.22152
1.41321	1.77898	1.51254	2.21757
1.41748	1.78506	1.50864	2.21377
1.42153	1.7908	1.50499	2.21015
1.42535	1.79618	1.50169	2.2067
1.42892	1.80122	1.49885	2.2034
1.43225	1.8059	1.49647	2.20025
1.43534	1.81024	1.49458	2.19724
1.43819	1.81422	1.49321	2.19435
1.44078	1.81783	1.49264	2.19158
1.44311	1.82108	1.49348	2.18891
1.44516	1.82396	1.4962	2.18636
1.44694	1.82645	1.50109	2.18383
1.44846	1.82857	1.50817	2.18134
1.44972	1.8303	1.5142	2.17886
1.45073	1.83166	1.51927	2.1764
1.45151	1.83264	1.52437	2.17395
1.45207	1.83326	1.53051	2.17215
1.45241	1.83354	1.53775	2.1697
1.45256	1.83348	1.54608	2.16611
1.45253	1.8331	1.55498	2.16201
1.45233	1.83243	1.56422	2.15772
1.45197	1.83148	1.5736	2.1536
1.45148	1.83028	1.58328	2.14962
1.45086	1.82882	1.59626	2.14584
1.45012	1.82714	1.60907	2.1422
1.44929	1.82523	1.62152	2.13861
1.44837	1.82313	1.63375	2.1351
1.44737	1.82082	1.64558	2.13171
1.4463	1.81834	1.65659	2.12849
1.44517	1.81568	1.66677	2.12531
1.44399	1.81285	1.67622	2.12203
1.44276	1.80988	1.68546	2.11867
1.44149	1.80674	1.69486	2.11523
1.44018	1.80343	1.70466	2.11171
1.43885	1.79993	1.71464	2.10812
1.43749	1.79623	1.72429	2.10448
1.43611	1.79231	1.73314	2.1008
1.43471	1.78818	1.74128	2.09707
1.43331	1.78382	1.74941	2.09333
1.4319	1.77926	1.75779	2.08957
1.4305	1.77449	1.76657	2.08581
1.42909	1.76953	1.77581	2.08206
1.42769	1.76441	1.78567	2.07832
1.42629	1.75913	1.79647	2.07449
1.42489	1.7537	1.80813	2.07062
1.42348	1.74815	1.82058	2.06675
1.42208	1.74247	1.83365	2.06292
1.42067	1.7367	1.84715	2.05916
1.41925	1.73083	1.86094	2.05545
1.41781	1.72488	1.87491	2.05181
1.41635	1.71887	1.8891	2.04823
1.41486	1.71281	1.90353	2.04471
1.41333	1.70673	1.91809	2.04125
1.41177	1.70062	1.93242	2.03784
1.41017	1.69451	1.94683	2.03447
1.40853	1.6884	1.96153	2.03112
1.40684	1.68231	1.97659	2.02782
1.40512	1.67624	1.99213	2.02456
1.40335	1.67021	2.00792	2.02134
1.40154	1.66421	2.02399	2.01816
1.39967	1.65825	2.04044	2.01502
1.39771	1.65233	2.05727	2.01195
1.39564	1.64646	2.07432	2.00892
1.39344	1.64067	2.09125	2.00596
1.39108	1.63496	2.10797	2.00306
1.38855	1.62937	2.12465	2.00031
1.38585	1.62391	2.14146	1.99749
1.38297	1.61858	2.15806	1.9947
1.37994	1.61338	2.17366	1.99208
1.37676	1.60831	2.18782	1.98954
1.37346	1.60335	2.20043	1.98708
1.37005	1.5985	2.21143	1.98467
1.36657	1.59374	2.22076	1.98233
1.36302	1.58905	2.22822	1.98017
1.35945	1.58442	2.23406	1.97817
1.35585	1.57984	2.23841	1.97627
1.35227	1.57531	2.24142	1.9744
1.3487	1.57081	2.24322	1.97257
1.34516	1.56634	2.24396	1.97077
1.34165	1.5619	2.24383	1.96901
1.33818	1.55747	2.2431	1.96726
1.33476	1.55305	2.24204	1.96553
1.33138	1.54863	2.24078	1.9638
1.32803	1.5442	2.23964	1.96207
1.32472	1.53977	2.23811	1.96037
1.32144	1.53532	2.23595	1.9587
1.31818	1.53087	2.23301	1.95707
1.31492	1.5264	2.22923	1.95548
1.31166	1.52192	2.22487	1.95391
1.30841	1.51744	2.21996	1.95236
1.30518	1.51294	2.2144	1.95083
1.302	1.50843	2.20803	1.9493
1.29889	1.5039	2.20079	1.94777
1.2959	1.49934	2.19287	1.94625
1.29303	1.49475	2.18451	1.94473
1.2903	1.49015	2.176	1.94311
1.28771	1.48552	2.16756	1.94162
1.28526	1.48089	2.15934	1.94019
1.28294	1.47626	2.15141	1.93865
1.28072	1.47165	2.14381	1.93709
1.27859	1.46706	2.13652	1.93552
1.27654	1.46252	2.12954	1.93397
1.27454	1.45803	2.12285	1.93243
1.27258	1.45362	2.11642	1.93087
1.27065	1.44929	2.11036	1.92929
1.26873	1.44506	2.10471	1.92772
1.26681	1.44095	2.09946	1.92606
1.26488	1.43694	2.09463	1.92432
1.26291	1.43305	2.09025	1.92258
1.26091	1.42927	2.08632	1.92084
1.25884	1.42561	2.08279	1.91913
1.25669	1.42207	2.07968	1.91749
1.25446	1.41865	2.07723	1.91595
1.25213	1.41535	2.0758	1.91451
1.24973	1.41217	2.0758	1.91307
1.24725	1.40912	2.07726	1.9116
1.24472	1.40618	2.07878	1.91009
1.24215	1.40334	2.07945	1.90853
1.23954	1.40059	2.07927	1.90694
1.23692	1.39792	2.07825	1.90533
1.23432	1.39535	2.07635	1.90371
1.23172	1.39287	2.0735	1.9021
1.22908	1.39048	2.06966	1.9005
1.22641	1.38819	2.06488	1.89893
1.22371	1.38599	2.05926	1.89737
1.221	1.38386	2.0529	1.89581
1.21829	1.38176	2.04589	1.89425
1.2156	1.37969	2.03832	1.89271
1.21291	1.37762	2.03026	1.89122
1.21023	1.37552	2.02175	1.88983
1.20757	1.37339	2.0128	1.88861
1.20494	1.37121	2.00343	1.88751
1.20232	1.36897	1.99362	1.88646
1.19966	1.36666	1.98337	1.88543
1.19696	1.36429	1.97254	1.88435
1.19419	1.36185	1.96107	1.88326
1.19136	1.35934	1.94892	1.88242
1.18848	1.35678	1.93604	1.88177
1.18559	1.35414	1.92243	1.88113
1.18267	1.35145	1.90808	1.88042
1.1797	1.34869	1.89295	1.87953
1.17666	1.34587	1.8769	1.87841
1.17358	1.34299	1.85971	1.87702
1.17049	1.34004	1.84105	1.87533
1.1674	1.33702	1.82071	1.8734
1.16424	1.33391	1.79878	1.87129
1.16102	1.33073	1.7768	1.86903
1.15772	1.32751	1.75577	1.86668
1.1544	1.32431	1.73573	1.86426
1.15103	1.32117	1.7167	1.8618
1.14756	1.31817	1.69872	1.85932
1.14397	1.31538	1.68184	1.85684
1.14028	1.31286	1.66603	1.85438
1.13653	1.31066	1.65119	1.85201
1.13273	1.30878	1.63717	1.84981
1.12888	1.30727	1.62386	1.84785
1.12494	1.30622	1.61115	1.84624
1.12086	1.30574	1.599	1.8451
1.11667	1.30585	1.58734	1.8446
1.11239	1.30652	1.57613	1.84491
1.10805	1.30764	1.56534	1.8464
1.10359	1.3091	1.55491	1.84985
1.09902	1.3108	1.54483	1.85549
1.09439	1.31266	1.53507	1.86272
1.08976	1.31458	1.52561	1.87113
1.08514	1.31648	1.51647	1.8799
1.08053	1.31826	1.50766	1.88862
1.07591	1.31974	1.49919	1.89704
1.07127	1.32081	1.49106	1.90526
1.06664	1.32153	1.48328	1.91327
1.06205	1.3219	1.47585	1.92125
1.05754	1.3219	1.46874	1.92923
1.05311	1.32152	1.46194	1.93729
1.04873	1.32081	1.45542	1.9456
1.04442	1.32002	1.44914	1.95429
1.04021	1.3193	1.44306	1.9634
1.03613	1.31876	1.43714	1.97294
1.03216	1.31843	1.43135	1.9829
1.02825	1.31836	1.42564	1.99327
1.02441	1.31872	1.41999	2.00408
1.02065	1.31962	1.41435	2.01526
1.017	1.32111	1.40867	2.02666
1.01346	1.32334	1.40291	2.03816
1.01	1.32638	1.39705	2.04956
1.00658	1.33009	1.39106	2.06072
1.00319	1.3343	1.38494	2.07156
0.999853	1.33912	1.37868	2.08188
0.996621	1.34535	1.37229	2.09154
0.993482	1.35437	1.36584	2.10024
0.990409	1.3662	1.3594	2.10774
0.987399	1.37901	1.35305	2.11371
0.984475	1.39113	1.34689	2.11729
0.981669	1.40154	1.34098	2.11837
0.978959	1.40982	1.33532	2.11753
0.976305	1.416	1.32992	2.11524
0.973693	1.42033	1.32474	2.11226
0.971117	1.42316	1.31972	2.10898
0.968579	1.42493	1.31482	2.1058
0.966073	1.42603	1.30999	2.10283
0.96359	1.42662	1.30517	2.10012
0.961118	1.42693	1.30035	2.09748
0.958642	1.42714	1.29549	2.0948
0.956147	1.4274	1.29058	2.09192
0.953619	1.42621	1.28563	2.08872
0.951049	1.42338	1.28064	2.0851
0.948427	1.42131	1.27562	2.08103
0.945748	1.42065	1.27062	2.07645
0.943009	1.42178	1.26564	2.07142
0.940207	1.42403	1.26072	2.06591
0.937342	1.42682	1.25587	2.05986
0.934419	1.42951	1.25113	2.05456
0.931447	1.43162	1.24655	2.05336
0.928441	1.43269	1.24215	2.05139
0.925416	1.43249	1.23796	2.04917
0.92239	1.4313	1.23399	2.04566
0.919378	1.42912	1.23026	2.04116
0.916395	1.42555	1.22673	2.03542
0.913451	1.41674	1.22337	2.02903
0.910553	1.3999	1.22013	2.02224
0.907704	1.38088	1.21692	2.01538
0.904904	1.36158	1.2137	2.0086
0.902153	1.34437	1.21041	2.00217
0.89945	1.32958	1.207	1.99607
0.896793	1.31746	1.20347	1.99042
0.894175	1.30754	1.19981	1.98518
0.891588	1.29951	1.19604	1.98036
0.889029	1.29295	1.19219	1.97577
0.886485	1.28756	1.1883	1.97132
0.883948	1.28301	1.18443	1.96686
0.88141	1.27907	1.18063	1.96244
0.878866	1.27558	1.17688	1.95815
0.876314	1.27233	1.17313	1.95412
0.873754	1.26925	1.16936	1.95046
0.871186	1.26779	1.16554	1.94717
0.868612	1.26796	1.1617	1.94425
0.866036	1.26722	1.15782	1.94168
0.863468	1.26484	1.15395	1.93946
0.86086	1.26039	1.15007	1.93757
0.858211	1.25443	1.14621	1.93595
0.855561	1.24729	1.14237	1.93458
0.854039	1.23946	1.1386	1.93224
0.84764	1.2313	1.13491	1.92564
0.842281	1.22311	1.13127	1.91974
0.83735	1.215	1.12761	1.91415
0.834111	1.20686	1.12386	1.90998
0.831974	1.19882	1.11996	1.90693
0.830879	1.19109	1.11587	1.90535
0.830312	1.18667	1.11161	1.90464
0.830077	1.18692	1.10718	1.90467
0.829926	1.18605	1.10262	1.90509
0.82971	1.18408	1.09797	1.90569
0.829329	1.18043	1.09326	1.9063
0.828726	1.17589	1.08853	1.90686
0.827884	1.17071	1.08429	1.90736
0.8268	1.16539	1.08022	1.90779
0.825472	1.16008	1.07633	1.90818
0.823919	1.15493	1.07246	1.90855
0.822169	1.14996	1.06848	1.90889
0.820253	1.14525	1.06422	1.90925
0.818206	1.14074	1.05962	1.90963
0.816062	1.13644	1.05471	1.91014
0.813851	1.13233	1.04955	1.91077
0.811601	1.12837	1.04423	1.91126
0.80933	1.12454	1.0388	1.91136
0.807003	1.12079	1.03328	1.91104
0.80468	1.1171	1.0277	1.91027
0.802353	1.11342	1.02204	1.90912
0.800096	1.10977	1.01631	1.90756
0.797918	1.10617	1.01049	1.9057
0.795789	1.10262	1.00458	1.90366
0.792582	1.09912	0.998513	1.90149
0.794302	1.09562	0.992294	1.8993
0.795028	1.09213	0.985943	1.89712
0.795364	1.08863	0.979523	1.89498
0.794036	1.08512	0.973107	1.89291
0.791619	1.08161	0.966752	1.89091
0.788161	1.07808	0.960491	1.88898
0.784159	1.07454	0.954273	1.8871
0.779796	1.07099	0.947966	1.88525
0.775306	1.06744	0.942139	1.88343
0.770827	1.06388	0.93706	1.88161
0.766452	1.06032	0.932681	1.87978
0.762235	1.05674	0.928843	1.87793
0.75819	1.05317	0.924828	1.87604
0.754327	1.04961	0.920878	1.87411
0.750654	1.04605	0.91691	1.87214
0.747162	1.04249	0.91308	1.87014
0.743831	1.03894	0.909505	1.86811
0.740643	1.03541	0.906302	1.86607
0.737573	1.03171	0.903516	1.864
0.734599	1.02794	0.901152	1.86181
0.731699	1.02405	0.899169	1.85948
0.728854	1.02009	0.897503	1.85728
0.72605	1.01606	0.896082	1.85544
0.72331	1.01199	0.894832	1.85399
0.720579	1.00786	0.893686	1.85294
0.71786	1.0037	0.892593	1.85223
0.715134	0.999506	0.891509	1.85184
0.712403	0.995277	0.890408	1.8517
0.709662	0.991011	0.889272	1.85171
0.706914	0.986707	0.888094	1.85181
0.70416	0.98236	0.886871	1.8519
0.701401	0.977968	0.885607	1.85196
0.698638	0.973526	0.884308	1.85194
0.695872	0.969033	0.882983	1.85183
0.693102	0.964486	0.88164	1.85162
0.690329	0.959891	0.880284	1.85131
0.687552	0.955256	0.878967	1.85093
0.684771	0.950584	0.877801	1.85054
0.681988	0.945878	0.876181	1.85006
0.679206	0.941134	0.873804	1.84943
0.676426	0.936363	0.870683	1.8486
0.673651	0.931568	0.866951	1.84761
0.670885	0.926746	0.862794	1.84644
0.668125	0.921905	0.858312	1.84519
0.665377	0.917054	0.853554	1.84391
0.662643	0.912195	0.848521	1.84255
0.659925	0.907335	0.843212	1.84115
0.657222	0.90245	0.837628	1.83974
0.654536	0.897729	0.831772	1.83838
0.651865	0.893066	0.825661	1.83708
0.649209	0.888515	0.819316	1.83586
0.646567	0.884021	0.812771	1.83473
0.643938	0.879601	0.806065	1.83368
0.641335	0.875225	0.799242	1.8327
0.638754	0.870903	0.792343	1.83178
0.636193	0.866623	0.78541	1.83091
0.633646	0.862391	0.778476	1.83016
0.63111	0.858205	0.771564	1.82954
0.62858	0.85407	0.764693	1.82901
0.626052	0.849988	0.757874	1.82859
0.623523	0.845964	0.751111	1.82826
0.62099	0.841999	0.744408	1.82795
0.618453	0.838098	0.737761	1.82771
0.615911	0.834259	0.731167	1.82758
0.613364	0.830484	0.724623	1.82758
0.610811	0.82677	0.718133	1.82775
0.608255	0.823109	0.711702	1.82809
0.605696	0.819496	0.705342	1.82855
0.603133	0.815927	0.699059	1.82923
0.600566	0.812408	0.69286	1.8302
0.597993	0.808929	0.686752	1.83151
0.595413	0.805491	0.68074	1.83313
0.592827	0.802098	0.674833	1.83506
0.590237	0.798738	0.669038	1.83722
0.587639	0.795407	0.66336	1.83952
0.585033	0.792108	0.657802	1.84201
0.582417	0.788841	0.652364	1.84462
0.579793	0.785611	0.647047	1.8473
0.57716	0.782417	0.64185	1.85
0.574519	0.779261	0.636771	1.85265
0.571868	0.776143	0.631808	1.85524
0.569209	0.773062	0.62696	1.85773
0.566541	0.770017	0.622223	1.86013
0.563863	0.767007	0.617593	1.86245
0.561177	0.764031	0.613066	1.86467
0.558481	0.761088	0.608637	1.86691
0.555776	0.758173	0.604301	1.86909
0.553062	0.75529	0.600054	1.87122
0.55034	0.752436	0.595892	1.87331
0.547608	0.74961	0.59181	1.87537
0.54487	0.746811	0.587806	1.8774
0.542124	0.744039	0.583874	1.87941
0.539372	0.741291	0.580011	1.88129
0.536614	0.738565	0.576214	1.88298
0.533852	0.735859	0.572477	1.88445
0.531085	0.733172	0.568797	1.88572
0.528316	0.730499	0.56517	1.88679
0.525545	0.72784	0.561591	1.88767
0.522773	0.725192	0.558057	1.88838
0.52	0.722553	0.554562	1.88894
0.517227	0.719922	0.551103	1.88939
0.514454	0.717296	0.547678	1.88974
0.511681	0.714673	0.544282	1.89001
0.508908	0.712053	0.540987	1.89022
0.506136	0.709434	0.537782	1.89038
0.503363	0.706815	0.534619	1.89052
0.500591	0.704195	0.531435	1.89065
0.497819	0.701574	0.528225	1.89076
0.495047	0.69895	0.524982	1.89087
0.492276	0.696323	0.521724	1.89097
0.489505	0.693693	0.518449	1.89106
0.486735	0.691058	0.51526	1.89113
0.483967	0.68842	0.512093	1.89118
0.481199	0.685777	0.50893	1.89134
0.478434	0.683129	0.50576	1.89158
0.475671	0.680482	0.50259	1.8918
0.472911	0.677831	0.499426	1.89196
0.470154	0.675173	0.49627	1.89207
0.467402	0.67251	0.493127	1.89205
0.464655	0.669842	0.489995	1.89186
0.461913	0.667166	0.486876	1.89153
0.459177	0.664485	0.48377	1.89114
0.456447	0.661814	0.480677	1.8907
0.453727	0.658816	0.477598	1.89054
0.451014	0.655673	0.474532	1.89063
0.448309	0.65212	0.471478	1.89108
0.445611	0.648241	0.468438	1.89184
0.44292	0.644223	0.465409	1.8929
0.440237	0.640217	0.462393	1.89419
0.437588	0.636322	0.459389	1.8955
0.435118	0.632583	0.456396	1.89676
0.432659	0.629003	0.453416	1.89794
0.430203	0.625567	0.450448	1.89915
0.42774	0.62225	0.447416	1.90039
0.425283	0.61903	0.44433	1.90165
0.422839	0.615888	0.441237	1.90292
0.420416	0.612808	0.438202	1.90419
0.418017	0.609777	0.435228	1.90545
0.415643	0.606783	0.432322	1.90671
0.413291	0.603818	0.429465	1.90785
0.410954	0.600875	0.426655	1.90888
0.408627	0.597948	0.423783	1.90995
0.4063	0.595033	0.420911	1.91107
0.403973	0.592127	0.418053	1.91213
0.401643	0.589228	0.415218	1.91313
0.399309	0.586328	0.412395	1.91397
0.396973	0.583439	0.409576	1.91467
0.394633	0.580558	0.40676	1.91524
0.392296	0.577688	0.403919	1.91575
0.389959	0.574829	0.401072	1.91627
0.387624	0.571986	0.398225	1.91677
0.385293	0.569161	0.395373	1.91725
0.382967	0.566339	0.392512	1.91781
0.380644	0.563861	0.389642	1.91812
0.378329	0.561547	0.386762	1.91822
0.376022	0.559664	0.383869	1.918
0.373724	0.558129	0.380965	1.91747
0.371436	0.556756	0.378047	1.91677
0.369157	0.555392	0.375117	1.91591
0.366861	0.553939	0.372175	1.91501
0.364405	0.552385	0.369218	1.91413
0.361955	0.550633	0.366248	1.91329
0.359521	0.548775	0.363263	1.91237
0.357115	0.546818	0.360263	1.91137
0.354722	0.544786	0.357248	1.91031
0.352336	0.542696	0.354218	1.9092
0.349952	0.540563	0.351174	1.90804
0.347564	0.538396	0.348114	1.90685
0.345176	0.536202	0.34504	1.90563
0.34278	0.533985	0.341954	1.90452
0.340355	0.53158	0.338857	1.9035
0.337929	0.528807	0.335752	1.90244
0.335547	0.525808	0.332638	1.90134
0.333213	0.52281	0.329519	1.90018
0.330923	0.519944	0.326395	1.89899
0.328657	0.517267	0.323269	1.89788
0.326383	0.514785	0.320143	1.89685
0.324117	0.512472	0.317014	1.89591
0.32189	0.51029	0.313906	1.89505
0.319707	0.5082	0.310798	1.89425
0.317547	0.506164	0.307687	1.89349
0.31538	0.504155	0.304575	1.89278
0.313204	0.50215	0.301465	1.89211
0.311041	0.500135	0.298362	1.89146
0.308926	0.498101	0.295266	1.89084
0.30684	0.496045	0.29218	1.89024
0.304754	0.493964	0.289106	1.88967
0.302661	0.491867	0.286046	1.88899
0.300582	0.489694	0.283002	1.88828
0.298547	0.487415	0.279974	1.88758
0.29654	0.485089	0.276964	1.88704
0.294529	0.482849	0.273971	1.88665
0.292513	0.480595	0.270998	1.88641
0.290499	0.478345	0.268044	1.88632
0.288492	0.47608	0.26511	1.88635
0.286513	0.473787	0.262197	1.88649
0.284588	0.471454	0.259303	1.88673
0.282696	0.469017	0.25643	1.88705
0.280802	0.46651	0.253576	1.88744
0.278908	0.463946	0.250742	1.88788
0.277039	0.461505	0.247926	1.88835
0.27518	0.4593	0.245126	1.88871
0.27331	0.457151	0.242342	1.88907
0.27144	0.454929	0.23957	1.88942
0.269582	0.452548	0.236808	1.88974
0.267753	0.449929	0.234052	1.89004
0.265977	0.447066	0.231299	1.89031
0.264231	0.443966	0.228545	1.89055
0.262481	0.440645	0.225786	1.89047
0.26072	0.437124	0.223018	1.89015
0.258968	0.433425	0.220237	1.88997
0.257256	0.429564	0.21744	1.88972
0.255585	0.425551	0.214623	1.88953
0.253933	0.421392	0.211781	1.88927
0.252263	0.417091	0.208913	1.88896
0.250593	0.412668	0.206013	1.88852
0.248953	0.408103	0.203079	1.88794
0.247348	0.403436	0.200109	1.88718
0.245757	0.398501	0.197101	1.88615
0.244147	0.393318	0.194055	1.88479
0.242536	0.387853	0.190969	1.88304
0.240953	0.38208	0.187842	1.881
0.2394	0.376082	0.184676	1.87873
0.237868	0.370067	0.18147	1.87628
0.236351	0.364137	0.178223	1.87367
0.234828	0.358173	0.174938	1.87091
0.23327	0.352204	0.171614	1.86799
0.231699	0.346257	0.168253	1.86489
0.230145	0.340481	0.164855	1.86162
0.228618	0.334975	0.161422	1.85821
0.227116	0.329661	0.157956	1.85483
0.225613	0.324697	0.154458	1.85153
0.224125	0.320098	0.150931	1.84811
0.222628	0.315732	0.147377	1.84452
0.221115	0.311463	0.143799	1.84072
0.219588	0.307247	0.140202	1.83663
0.218053	0.302991	0.136588	1.83209
0.216513	0.298634	0.132964	1.82687
0.214969	0.29412	0.129333	1.8212
0.21342	0.289438	0.1257	1.81508
0.211863	0.284598	0.122072	1.80836
0.210296	0.279598	0.118453	1.80151
0.208715	0.274497	0.114849	1.79463
0.20712	0.269349	0.111265	1.78801
0.205509	0.264209	0.107708	1.78172
0.203881	0.259112	0.104184	1.77593
0.202239	0.25413	0.100699	1.77071
0.200581	0.24926	0.0972572	1.76617
0.198909	0.244762	0.0938639	1.76241
0.197223	0.240673	0.0905232	1.75952
0.195525	0.236954	0.0872388	1.75745
0.193814	0.233599	0.0840143	1.75609
0.192091	0.230548	0.080853	1.75536
0.190358	0.227597	0.077758	1.75524
0.188614	0.224652	0.0747321	1.75591
0.186861	0.221847	0.0717776	1.75767
0.185099	0.219157	0.0688971	1.76096
0.18333	0.216614	0.0660928	1.76595
0.181553	0.214058	0.0633164	1.77186
0.179771	0.211407	0.061183	1.77809
0.177984	0.208714	0.0601154	1.78412
0.176213	0.205864	0.0602057	1.78985
0.174428	0.202872	0.0616795	1.79528
0.172639	0.199764	0.0644412	1.80049
0.170844	0.196585	0.0679401	1.80552
0.169048	0.19341	0.0712571	1.81051
0.167251	0.190354	0.0731284	1.81566
0.165453	0.187456	0.0732157	1.8213
0.163657	0.184753	0.073955	1.82757
0.161864	0.182254	0.0759736	1.83443
0.160075	0.179988	0.0777216	1.84168
0.15829	0.178058	0.0790405	1.84909
0.156511	0.17643	0.0800583	1.85646
0.15474	0.175064	0.0809199	1.86362
0.152976	0.173966	0.0817745	1.87047
0.151222	0.173147	0.0827106	1.87691
0.149477	0.172547	0.0837813	1.88284
0.147741	0.172101	0.0849488	1.88823
0.146016	0.171791	0.086186	1.89303
0.144302	0.171618	0.0875673	1.89722
0.142601	0.171524	0.0890286	1.90076
0.140914	0.171462	0.0904968	1.90365
0.139244	0.171445	0.0918488	1.90592
0.137589	0.171497	0.092936	1.90752
0.13595	0.171614	0.0937363	1.90828
0.134324	0.171726	0.09429	1.90789
0.132707	0.171851	0.0945787	1.90595
0.131092	0.172068	0.0946003	1.90236
0.129471	0.17243	0.0944851	1.8979
0.127833	0.172961	0.0937024	1.89314
0.126167	0.173672	0.0919382	1.8885
0.124461	0.174553	0.0891772	1.88417
0.122702	0.17559	0.0852327	1.88025
0.120879	0.176802	0.0802106	1.87679
0.118983	0.178258	0.0746561	1.87391
0.117005	0.17995	0.0694799	1.87159
0.114943	0.181815	0.0659077	1.86983
0.112794	0.183841	0.0642691	1.86858
0.110561	0.186095	0.0621488	1.86779
0.108251	0.188621	0.058876	1.86743
0.105875	0.191419	0.0559855	1.86755
0.103453	0.194255	0.0536398	1.86821
0.100998	0.197	0.0516924	1.86948
0.0985296	0.199808	0.0500026	1.87145
0.0960704	0.202693	0.0484025	1.87416
0.0936413	0.205545	0.0468063	1.87761
0.0912625	0.208387	0.0451345	1.88182
0.0889517	0.211226	0.0435392	1.88692
0.0867229	0.213989	0.0421315	1.89315
0.0845865	0.216587	0.0406252	1.90071
0.0825493	0.219079	0.0390409	1.90951
0.0806153	0.221526	0.0374104	1.9193
0.0787865	0.223916	0.0358672	1.9299
0.077064	0.226193	0.0345703	1.9412
0.0754487	0.228305	0.0335643	1.95315
0.0739424	0.230338	0.032823	1.96571
0.0725478	0.232324	0.0323745	1.97877
0.0712696	0.23419	0.0322256	1.99223
0.0701136	0.235726	0.0324794	2.00611
0.0690876	0.236814	0.0329095	2.02042
0.0681999	0.237624	0.0333987	2.03521
0.0674597	0.238215	0.0338214	2.05056
0.0668761	0.238549	0.0340995	2.06652
0.0664573	0.238635	0.0342183	2.08309
0.0662102	0.238491	0.0341907	2.10027
0.0661388	0.238188	0.0340364	2.1187
0.0662445	0.237876	0.0338256	2.13853
0.066525	0.237767	0.0335984	2.16
0.0669746	0.237894	0.0333271	2.18355
0.0675831	0.23817	0.0330412	2.21016
0.0683365	0.238786	0.0327388	2.2408
0.0692118	0.24025	0.0324074	2.27491
0.0701927	0.242663	0.0320571	2.31048
0.0712553	0.245791	0.0317663	2.34457
0.0723745	0.249131	0.0315534	2.37578
0.0735252	0.252438	0.031387	2.40508
0.0746836	0.255596	0.0312644	2.43232
0.0758288	0.258695	0.0310369	2.4577
0.0769433	0.26187	0.0306192	2.48128
0.0780129	0.265219	0.03023	2.5031
0.079027	0.268689	0.0299618	2.52338
0.0799781	0.272235	0.0298369	2.54264
0.080861	0.275943	0.0298333	2.56124
0.0816722	0.279847	0.0299195	2.57957
0.0824099	0.283917	0.0300681	2.59878
0.0830733	0.288083	0.0302617	2.61883
0.0836613	0.29212	0.0304935	2.63963
0.0841736	0.295921	0.0307832	2.6606
0.0846128	0.299749	0.0309892	2.6814
0.0849813	0.303721	0.0312482	2.70168
0.0852814	0.307531	0.0315496	2.72126
0.0855159	0.310998	0.0319209	2.73999
0.0856872	0.314268	0.0323958	2.75783
0.0857983	0.317191	0.0329845	2.77889
0.0858519	0.319679	0.0336787	2.8054
0.085851	0.321887	0.0344654	2.82861
0.0857987	0.32381	0.0353104	2.84947
0.0856981	0.32527	0.0361789	2.86539
0.0855525	0.326268	0.0370715	2.8768
0.0853652	0.326884	0.0379878	2.88275
0.0851397	0.326912	0.0389292	2.88288
0.0848794	0.325992	0.0398904	2.87785
0.0845876	0.324134	0.0408701	2.87002
0.0842677	0.321398	0.0417795	2.86238
0.083923	0.31821	0.0426145	2.85631
0.0835568	0.314852	0.0434018	2.85085
0.0831721	0.311424	0.0441695	2.84611
0.082772	0.307844	0.0449496	2.84177
0.0823592	0.304048	0.0457406	2.83761
0.0819364	0.299876	0.0465309	2.83341
0.081506	0.295282	0.0472552	2.82902
0.0810703	0.290497	0.0479243	2.82408
0.0806315	0.285524	0.0485418	2.81845
0.0801913	0.280325	0.0491197	2.81177
0.0797517	0.274973	0.049658	2.80301
0.0793142	0.269547	0.0501566	2.79231
0.0788814	0.264088	0.05061	2.78006
0.0784558	0.258617	0.0509909	2.767
0.078037	0.253226	0.0512561	2.75361
0.0776254	0.24795	0.0514097	2.74037
0.0772217	0.242897	0.0514699	2.72747
0.0768261	0.238243	0.0514573	2.71502
0.0764392	0.233738	0.0513761	2.70297
0.0760611	0.229421	0.0512226	2.68712
0.0756923	0.225551	0.0509912	2.66513
0.0753328	0.221977	0.0506775	2.6451
0.0749829	0.218576	0.0502771	2.62571
0.0746425	0.215209	0.0497875	2.60928
0.0743117	0.211736	0.0492098	2.59511
0.0739903	0.208187	0.0485548	2.58333
0.073677	0.204704	0.0478358	2.57337
	0.201405	0.0470648	2.56502
	0.198072	0.0462504	2.55763
	0.194655	0.045398	2.55079
	0.191226	0.0445085	2.54426
	0.187815	0.0435799	2.53803
	0.184472	0.0426101	2.53208
	0.181199	0.0415989	2.52642
	0.178163	0.0405478	2.52101
	0.175572	0.0394593	2.50847
	0.173249	0.0383485	2.48976
	0.170913	0.0372221	2.47634
	0.168522	0.0360865	2.46733
	0.166108	0.0349494	2.46177
	0.163711	0.0338141	2.457
	0.161289	0.0326824	2.45259
	0.159158	0.0315554	2.44788
	0.157475	0.0304337	2.44307
	0.155765	0.0293181	2.43801
	0.153863	0.0282098	2.43275
	0.151854	0.02711	2.42717
	0.149712	0.0260202	2.42134
	0.147636	0.0249421	2.41527
	0.145728	0.0238757	2.40903
	0.143761	0.0228288	2.40262
	0.141828	0.0218084	2.39601
	0.140039	0.0208215	2.38938
	0.13828	0.0198748	2.38273
	0.136548	0.0189737	2.37581
	0.134841	0.0181224	2.36836
	0.133002	0.0173232	2.36022
	0.130941	0.0165775	2.34059
	0.128894	0.0158859	2.28228
	0.126933	0.0152479	2.23633
	0.125001	0.0146653	2.19939
	0.123085	0.0141397	2.17187
	0.121142	0.0136717	2.15113
	0.119179	0.0132607	2.13563
	0.117017	0.0129051	2.12309
	0.114577	0.0126034	2.11954
	0.112113	0.0123536	2.12298
	0.109702	0.0121539	2.12148
	0.107295	0.0120022	2.11565
	0.104899	0.0118965	2.10657
	0.10249	0.0118346	2.09678
	0.100087	0.0118145	2.08666
	0.09752	0.0118345	2.07673
	0.0947182	0.0118926	2.06668
	0.0919456	0.0119869	2.05663
	0.0892849	0.0121155	2.0465
	0.0866956	0.0122758	2.03643
	0.0841824	0.0124655	2.0264
	0.0817444	0.0126823	2.01651
	0.0793452	0.0129235	2.00678
	0.0769995	0.0131865	1.99726
	0.0745383	0.0134686	1.98798
	0.0718788	0.0137667	1.97892
	0.0692917	0.0140779	1.97007
	0.0668674	0.0143994	1.96143
	0.0645788	0.0147283	1.95305
	0.0624367	0.015062	1.94495
	0.0604295	0.0153982	1.94796
	0.0585649	0.0157347	1.98943
	0.0568487	0.0160697	2.0186
	0.0552931	0.0164013	2.03925
	0.0539088	0.0167281	2.05223
	0.0527066	0.0170489	2.06038
	0.0516955	0.0173625	2.06365
	0.0508837	0.0176683	2.06369
	0.050277	0.0179654	2.06202
	0.04988	0.0182535	2.06056
	0.0496954	0.018532	2.0742
	0.0497222	0.018801	2.10113
	0.0499631	0.0190603	2.12998
	0.050424	0.0193101	2.15775
	0.0511095	0.0195504	2.18172
	0.0520194	0.0197814	2.20266
	0.053152	0.0200033	2.22282
	0.0545001	0.0202163	2.24233
	0.0560463	0.0204205	2.26175
	0.0578062	0.0206166	2.28111
	0.0597747	0.0208049	2.29957
	0.0619073	0.0209856	2.32198
	0.0642356	0.0211587	2.34107
	0.0667594	0.0213246	2.35689
	0.0694796	0.0214837	2.37178
	0.0723922	0.0216364	2.38575
	0.0754907	0.0217829	2.39973
	0.0787647	0.0219237	2.41348
	0.0821991	0.022059	2.42729
	0.0857855	0.022189	2.44112
	0.0895001	0.0223139	2.45496
		0.0224341	2.46875
		0.0225499	2.48797
		0.0226619	2.50828
		0.0227702	2.52293
		0.0228751	2.53242
		0.0229769	2.53965
		0.023076	2.54451
		0.0231724	2.54874
		0.0232664	2.55289
		0.023358	2.54293
		0.0234474	2.52134
		0.0235345	2.49917
		0.0236195	2.47926
		0.0237021	2.46403
		0.0237823	2.45468
		0.0238601	2.4346
		0.0239353	2.42547
		0.0240079	2.41394
		0.0240776	2.40715
		0.0241444	2.39932
		0.024208	2.38949
		0.024268	2.38213
		0.0243242	2.37897
		0.0243765	2.37639
		0.0244248	2.37515
		0.0244692	2.37477
		0.0245096	2.3694
		0.0245461	2.36537
		0.0245788	2.3631
		0.0246076	2.36133
		0.0246324	2.36009
		0.024653	2.35365
		0.0246692	2.34645
		0.0246809	2.34427
		0.0246878	2.34658
		0.0246899	2.35221
		0.0246871	2.36169
		0.0246791	2.37298
		0.0246661	2.38459
		0.0246478	2.39607
		0.0246242	2.4069
		0.0245951	2.41736
		0.0245604	2.4275
		0.0245201	2.43762
		0.0244738	2.44579
		0.0244217	2.46646
		0.0243635	2.4778
		0.0242992	2.49255
		0.0242286	2.50328
		0.0241517	2.51644
		0.0240684	2.52988
		0.0239789	2.54665
		0.023883	2.56366
		0.0237807	2.57975
		0.0236721	2.59472
		0.0235572	2.60798
		0.0234361	2.62621
		0.0233087	2.64282
		0.0231751	2.65785
		0.0230348	2.67283
		0.0228876	2.68805
		0.0227331	2.70378
		0.0225711	2.71966
		0.0224014	2.7352
		0.0222238	2.75014
		0.0220381	2.76416
		0.0218442	2.77732
		0.0216419	2.78964
		0.021431	2.8012
		0.0212115	2.81239
		0.0209833	2.8232
		0.0207462	2.83263
		0.0205	2.84066
		0.0202446	2.84739
		0.0199804	2.85304
		0.0197078	2.8577
		0.0194271	2.86147
		0.0191388	2.86431
		0.0188435	2.86658
		0.0185416	2.86846
		0.0182336	2.86802
		0.0179198	2.86486
		0.0176008	2.86016
		0.0172768	2.85632
		0.0169482	2.85273
		0.0166152	2.84963
		0.0162784	2.84661
		0.0159383	2.84368
		0.0155953	2.84048
		0.0152502	2.83676
		0.0149036	2.83224
		0.0145561	2.82689
		0.0142084	2.82077
		0.0138612	2.8141
		0.0135151	2.80702
		0.013171	2.79966
		0.0128296	2.7921
		0.0124917	2.7844
		0.0121584	2.77667
		0.0118303	2.76883
		0.0115082	2.76057
		0.0111926	2.75312
		0.0108854	2.74651
		0.0105869	2.74073
		0.0102949	2.73546
		0.01001	2.73057
		0.00973362	2.72587
		0.00946937	2.72144
		0.00921805	2.71705
		0.00898042	2.71268
		0.00875606	2.70842
		0.00854516	2.70448
		0.00834761	2.70106
		0.00816364	2.69819
		0.00799288	2.69584
		0.00783498	2.69383
		0.00768924	2.69052
		0.00755525	2.68723
		0.00743244	2.68429
		0.00732055	2.67923
		0.00721915	2.6752
		0.00712778	2.67018
		0.00704587	2.66562
		0.00697329	2.66045
		0.00690986	2.65538
		0.00685537	2.64994
		0.00680956	2.64451
		0.00677213	2.63916
		0.00674269	2.63398
		0.00672055	2.62835
		0.00670486	2.62269
		0.00669499	2.61685
		0.0066896	2.61094
		0.00668816	2.6049
		0.00669306	2.59887
		0.0067037	2.59288
		0.00671869	2.587
		0.00673447	2.5812
		0.00675034	2.57551
		0.00676562	2.56992
		0.00678099	2.56442
		0.00679641	2.59228
		0.00681225	2.60253
		0.00682845	2.6133
		0.00684555	2.62137
		0.00686399	2.62772
		0.00688443	2.63579
		0.00690699	2.64388
		0.00693188	2.6565
		0.0069592	2.66817
		0.00698938	2.67672
		0.00702276	2.68614
		0.00705976	2.69443
		0.00710037	2.70363
		0.00714774
		0.00719372
		0.00723911
		0.00728578
		0.0073349
		0.00738715
		0.00744315
		0.00750323
		0.00756742
		0.00763592
		0.00770884
		0.00778575
		0.00786664
		0.00795124
		0.00803936
		0.00813066
		0.00822479
		0.00832136
		0.00841993
		0.00852001
		0.00862106
		0.00872246
		0.00882371
		0.00892459
		0.00902539
		0.00912601
		0.0092261
		0.00932516
		0.0094227
		0.00951827
		0.0096084
		0.00970082
		0.00979419
		0.00988617
		0.00997531
		0.0100611
		0.0101434
		0.0102226
		0.0102989
		0.0103722
		0.0104425
		0.0105098
		0.010574
		0.0106348
		0.0106922
		0.0107462
		0.0107968
		0.0108441
		0.0108881
		0.0109289
		0.0109669
		0.0110022
		0.0110351
		0.0110656
		0.0110936
		0.0111191
		0.0111424
		0.0111639
		0.0111841
		0.0112034
		0.011222
		0.0112401
		0.011258
		0.0112759
		0.0112941
		0.0113129
		0.0113327
		0.0113534
		0.011375
		0.0113979
		0.0114222
		0.0114484
		0.0114766
		0.0115074
		0.0115409
		0.0115774
[truncated: 866 more rows]

## Sheet: Figure 3F
No Reflux No QC source	No Reflux QC source	Reflux No QC source	Reflux QC source
1.39814	1.59848	1.8791	1.99049
1.39799	1.59418	1.878	1.98978
1.39771	1.59033	1.877	1.98853
1.39771	1.58633	1.87379	1.98711
1.39771	1.58209	1.86249	1.98544
1.39771	1.57827	1.85276	1.98167
1.39784	1.55734	1.8372	1.96418
1.39716	1.53831	1.82213	1.94858
1.39584	1.52028	1.80839	1.93387
1.39458	1.5019	1.79569	1.91959
1.39288	1.47686	1.77927	1.90401
1.38527	1.45784	1.76619	1.88756
1.36784	1.43839	1.75323	1.87182
1.35242	1.41833	1.74062	1.85557
1.33741	1.39697	1.72827	1.83993
1.32301	1.37644	1.71602	1.8251
1.30712	1.35519	1.70388	1.81073
1.29142	1.33469	1.69175	1.79662
1.27559	1.31496	1.67955	1.78266
1.25973	1.29506	1.66734	1.76878
1.24192	1.27387	1.65515	1.75506
1.22648	1.25473	1.64299	1.74123
1.21117	1.23565	1.63071	1.72313
1.19581	1.21717	1.61832	1.70909
1.18062	1.19876	1.60583	1.69477
1.16502	1.17999	1.59335	1.68035
1.14933	1.1617	1.58091	1.66583
1.13395	1.14371	1.5684	1.65123
1.11819	1.12525	1.55587	1.63665
1.10238	1.10735	1.54073	1.622
1.0868	1.08947	1.52739	1.60719
1.07078	1.07138	1.51427	1.59238
1.05482	1.05366	1.50147	1.57743
1.03904	1.03624	1.48889	1.56248
1.02296	1.01785	1.47645	1.5584
1.00627	1.00044	1.46428	1.54311
1.00335	0.995577	1.45231	1.52766
0.986112	0.977241	1.44053	1.51177
0.984232	0.958789	1.42905	1.49567
0.965904	0.956833	1.41776	1.48054
0.946034	0.938413	1.40668	1.46444
0.92918	0.918734	1.39587	1.46057
0.91416	0.901484	1.38528	1.44367
0.900222	0.886087	1.3749	1.42661
0.886945	0.872126	1.36478	1.41029
0.873779	0.858537	1.35491	1.39478
0.860603	0.845272	1.34527	1.38004
0.84755	0.831977	1.33589	1.36616
0.834532	0.81896	1.32674	1.35349
0.821788	0.806046	1.31783	1.34105
0.809134	0.793471	1.30916	1.32928
0.795971	0.781105	1.30074	1.31831
0.783952	0.768273	1.29204	1.30806
0.772103	0.75665	1.2827	1.29827
0.760583	0.745076	1.2735	1.28878
0.749232	0.735512	1.2648	1.27945
0.738332	0.724062	1.25678	1.27024
0.730167	0.712512	1.24934	1.26114
0.719198	0.701484	1.2424	1.25219
0.707856	0.690687	1.23586	1.24338
0.696951	0.680527	1.22963	1.23472
0.686129	0.670646	1.22364	1.22623
0.675696	0.661314	1.21784	1.21791
0.665704	0.652192	1.2122	1.20975
0.655942	0.641361	1.20671	1.20758
0.646008	0.632232	1.20135	1.19939
0.635889	0.622916	1.19611	1.20043
0.624148	0.613619	1.19096	1.1876
0.614066	0.604491	1.1859	1.17681
0.604058	0.595635	1.1809	1.16714
0.594307	0.587113	1.17595	1.15873
0.584846	0.578965	1.17063	1.15093
0.575692	0.571225	1.16515	1.14353
0.566834	0.56391	1.15976	1.13652
0.558389	0.557022	1.15485	1.12992
0.550966	0.550693	1.15033	1.1237
0.54423	0.544985	1.14608	1.1178
0.537906	0.53986	1.14199	1.11438
0.531739	0.535154	1.13796	1.10877
0.525484	0.532277	1.13396	1.10302
0.522547	0.530644	1.12995	1.0972
0.517014	0.525279	1.12379	1.09126
0.508868	0.519797	1.11968	1.08527
0.500618	0.514862	1.11149	1.07923
0.492767	0.510193	1.10712	1.07318
0.48538	0.505514	1.10279	1.06708
0.478296	0.500752	1.09841	1.06093
0.471403	0.49589	1.09257	1.05325
0.464685	0.490934	1.08808	1.04662
0.458165	0.485924	1.0835	1.04002
0.451894	0.480932	1.07912	1.03355
0.44592	0.476029	1.07495	1.02716
0.440222	0.471275	1.07091	1.02083
0.434786	0.466701	1.06694	1.01456
0.429634	0.462316	1.06302	1.0077
0.424717	0.458115	1.05912	1.00147
0.419977	0.454089	1.05526	0.995118
0.415384	0.450246	1.05144	0.98897
0.410876	0.44662	1.04767	0.981167
0.406412	0.445187	1.04395	0.975213
0.401945	0.442606	1.04028	0.969188
0.399159	0.440082	1.03666	0.96323
0.394582	0.437628	1.03308	0.95733
0.390664	0.435431	1.02954	0.951446
0.385756	0.433004	1.02603	0.945539
0.380698	0.430695	1.02252	0.939622
0.375762	0.428567	1.01902	0.933708
0.370951	0.426593	1.01552	0.927802
0.366245	0.42478	1.01203	0.921915
0.361835	0.423075	1.00855	0.916057
0.358037	0.421463	1.00508	0.910234
0.354537	0.419928	1.00162	0.904449
0.351107	0.418457	0.998186	0.898703
0.347702	0.417031	0.994766	0.892994
0.344321	0.415638	0.991371	0.887319
0.340991	0.414265	0.988005	0.881673
0.337707	0.412905	0.984651	0.876057
0.334488	0.411552	0.981299	0.870475
0.331358	0.410204	0.97794	0.864929
0.328312	0.407686	0.974571	0.867594
0.325334	0.40627	0.971188	0.859612
0.32241	0.404826	0.966671	0.855383
0.319547	0.403397	0.963029	0.849521
0.316721	0.401972	0.959249	0.843428
0.312849	0.399227	0.955541	0.837535
0.310063	0.396369	0.951867	0.8319
0.306654	0.393546	0.948309	0.826476
0.303873	0.392076	0.94484	0.821269
0.301094	0.390725	0.941428	0.816232
0.298373	0.389639	0.938076	0.811644
0.295688	0.388715	0.934719	0.80698
0.292124	0.387906	0.931375	0.802419
0.289435	0.387147	0.928018	0.798081
0.286561	0.386381	0.924652	0.793945
0.283769	0.385568	0.921277	0.788309
0.280887	0.384681	0.91789	0.782715
0.278023	0.383701	0.914492	0.778419
0.275212	0.382626	0.911082	0.776071
0.272439	0.381461	0.907657	0.771573
0.269879	0.38021	0.904217	0.766966
0.267516	0.378881	0.901492	0.762388
0.265296	0.377477	0.898127	0.75779
0.263175	0.375998	0.894578	0.753127
0.261114	0.374451	0.890998	0.748458
0.259089	0.372856	0.887672	0.743809
0.257077	0.371227	0.886787	0.739062
0.254517	0.369575	0.884175	0.734248
0.252405	0.367906	0.881608	0.729407
0.250205	0.366223	0.878991	0.724564
0.247957	0.364529	0.875576	0.719732
0.245678	0.362833	0.872856	0.714923
0.243362	0.361141	0.869838	0.710148
0.240994	0.359463	0.866827	0.705414
0.238534	0.357812	0.8639	0.700729
0.235962	0.356195	0.860947	0.696105
0.233287	0.354615	0.857989	0.691552
0.230533	0.353071	0.85501	0.688467
0.227733	0.351557	0.851981	0.684041
0.224918	0.350059	0.848877	0.67949
0.222098	0.348563	0.845679	0.675024
0.219285	0.347051	0.842806	0.670593
0.216817	0.345483	0.838983	0.666225
0.214075	0.343917	0.835134	0.661976
0.211272	0.342443	0.831415	0.657882
0.208517	0.341011	0.827727	0.653942
0.20586	0.339612	0.824039	0.650148
0.203299	0.338247	0.820392	0.646484
0.20083	0.336909	0.816762	0.642937
0.198431	0.335594	0.813128	0.642246
0.196079	0.334303	0.809478	0.641568
0.193146	0.333032	0.807541	0.640897
0.190834	0.331772	0.803302	0.640234
0.188533	0.330515	0.798731	0.636891
0.186231	0.329256	0.79417	0.636232
0.183924	0.327991	0.789747	0.634051
0.18161	0.32672	0.785417	0.630837
0.179294	0.326396	0.781193	0.627959
0.176981	0.32614	0.777072	0.627318
0.174679	0.325884	0.773049	0.626682
0.172399	0.32563	0.769113	0.62416
0.170148	0.325376	0.76525	0.622399
0.167422	0.325123	0.761455	0.620939
0.165251	0.324872	0.756937	0.618111
0.163099	0.324622	0.753241	0.615251
0.160987	0.324376	0.74954	0.612432
0.158972	0.324131	0.752732	0.609651
0.157354	0.323888	0.748646	0.606972
0.155989	0.323648	0.744297	0.604396
0.154667	0.32341	0.739217	0.601915
0.153343	0.323175	0.734578	0.599518
0.152006	0.322942	0.730317	0.597209
0.150652	0.322712	0.72638	0.594982
0.149285	0.322485	0.722655	0.59279
0.147914	0.322261	0.719105	0.590597
0.146553	0.322039	0.715695	0.58842
0.145222	0.32182	0.71237	0.586251
0.143938	0.320814	0.70909	0.584075
0.142723	0.320601	0.705825	0.582183
0.141584	0.319334	0.702562	0.580234
0.140518	0.318041	0.699311	0.577871
0.139514	0.317757	0.696081	0.575531
0.138674	0.317545	0.692882	0.573282
0.137546	0.317333	0.689725	0.570498
0.136419	0.317123	0.686614	0.56837
0.13535	0.316917	0.683536	0.565222
0.134342	0.316714	0.680119	0.56296
0.13338	0.315406	0.67544	0.558998
0.132454	0.315261	0.67242	0.556766
0.131544	0.31507	0.669414	0.554546
0.130578	0.314873	0.666529	0.557666
0.129675	0.314663	0.663681	0.555054
0.128849	0.314452	0.66083	0.551957
0.128106	0.313283	0.657978	0.548772
0.127425	0.313086	0.655143	0.545221
0.126763	0.31289	0.652349	0.542043
0.126066	0.312694	0.649612	0.538857
0.125276	0.312502	0.646943	0.535821
0.124359	0.312313	0.644335	0.533326
0.123334	0.312126	0.641784	0.530992
0.122226	0.310869	0.639277	0.528846
0.121054	0.310688	0.636804	0.526878
0.119841	0.310509	0.634357	0.525066
0.118611	0.310325	0.631929	0.523317
0.117385	0.310141	0.635397	0.521578
0.116187	0.309956	0.631345	0.519823
0.115015	0.309772	0.627715	0.518051
0.113877	0.309587	0.624453	0.51628
0.112801	0.309403	0.621459	0.514521
0.11177	0.30922	0.618549	0.51278
0.110776	0.309037	0.61574	0.510718
0.109817	0.308855	0.613022	0.509041
0.108893	0.308673	0.610401	0.507362
0.108008	0.308491	0.611232	0.50576
0.107163	0.308309	0.608271	0.50421
0.106356	0.308127	0.604873	0.502707
0.105586	0.307945	0.6016	0.501216
0.104851	0.307763	0.598482	0.49973
0.104151	0.30758	0.595505	0.498246
0.103481	0.307398	0.592083	0.496772
0.102844	0.307217	0.588899	0.495312
0.102219	0.307036	0.585806	0.493861
0.101634	0.306856	0.582872	0.492416
0.101084	0.306676	0.579484	0.490974
0.10058	0.306497	0.577667	0.489523
0.100113	0.30632	0.573981	0.488058
0.0996823	0.306141	0.570669	0.486576
0.0992752	0.305964	0.567319	0.485077
0.0988821	0.305789	0.564406	0.483562
0.0984884	0.305615	0.561889	0.482028
0.0980742	0.305442	0.559617	0.480486
0.0976282	0.305271	0.557556	0.478934
0.0971491	0.305101	0.555607	0.477375
0.0966373	0.304932	0.561751	0.47654
0.0960979	0.304764	0.558425	0.476145
0.0955446	0.304596	0.555129	0.475753
0.0949856	0.304428	0.552062	0.475365
0.0944253	0.304261	0.549334	0.474978
0.0938653	0.304095	0.546815	0.474594
0.0933059	0.304626	0.544459	0.474212
0.0927484	0.303536	0.542228	0.473831
0.0921987	0.302389	0.540083	0.473451
0.0916622	0.301242	0.537991	0.473074
0.0911453	0.3001	0.535931	0.472696
0.0904244	0.298985	0.533874	0.47232
0.0899865	0.297894	0.531783	0.471945
0.0895565	0.296864	0.529682	0.47157
0.0891629	0.295884	0.527561	0.471196
0.0888032	0.293938	0.525414	0.470822
0.0884769	0.293855	0.523279	0.470347
0.0881818	0.293728	0.520834	0.468876
0.0879168	0.293597	0.518374	0.467343
0.0876581	0.293457	0.515892	0.465817
0.0874238	0.293318	0.513377	0.464309
0.0873008	0.293179	0.510855	0.462817
0.087278	0.293043	0.508342	0.461607
0.0873018	0.292909	0.505822	0.461205
0.087349	0.292778	0.503286	0.460812
0.0874051	0.292649	0.500716	0.46043
0.0874683	0.292521	0.498117	0.460059
0.0875363	0.292396	0.495494	0.459699
0.0876085	0.292272	0.492841	0.45935
0.087674	0.292148	0.49016	0.459009
0.0877206	0.292026	0.487454	0.460029
0.0877425	0.291904	0.484724	0.458487
0.0877392	0.291783	0.481976	0.456775
0.0877104	0.291662	0.479086	0.458936
0.087656	0.29154	0.476081	0.457178
0.087577	0.291419	0.473069	0.455118
0.0874745	0.291296	0.470118	0.453228
0.0873495	0.291173	0.467235	0.451218
0.0872048	0.291049	0.464401	0.464664
0.0871471	0.290925	0.461629	0.459364
0.086968	0.2908	0.458917	0.454931
0.086768	0.290674	0.456247	0.451408
0.0865578	0.289622	0.453673	0.448313
0.086348	0.289587	0.451263	0.4452
0.0861354	0.289463	0.44896	0.458516
0.0859193	0.28934	0.446718	0.453928
0.0857022	0.289208	0.444518	0.449723
0.085478	0.289073	0.442357	0.445902
0.0852384	0.288931	0.440234	0.442366
0.0849806	0.288785	0.437943	0.437848
0.0846939	0.288637	0.435935	0.434983
0.0843746	0.28849	0.433047	0.43239
0.0840223	0.288342	0.430672	0.430052
0.0836365	0.288197	0.428322	0.427935
0.0832196	0.288054	0.426368	0.42601
0.0827764	0.287912	0.424711	0.424243
0.0823123	0.287772	0.423343	0.422605
0.0818311	0.287635	0.42218	0.421092
0.0813355	0.287499	0.421126	0.41969
0.080828	0.287364	0.420093	0.418382
0.0803102	0.287228	0.419987	0.417244
0.0797848	0.287093	0.418836	0.416308
0.0797594	0.286957	0.417725	0.415507
0.0791675	0.28682	0.417278	0.414657
0.0785223	0.286681	0.415823	0.413857
0.0778752	0.286542	0.414279	0.413001
0.0772471	0.286402	0.41273	0.412241
0.0766397	0.286261	0.411185	0.41152
0.0760506	0.286118	0.409644	0.410852
0.0753701	0.285976	0.408138	0.410592
0.0748266	0.285832	0.406658	0.409851
0.0742829	0.285688	0.405203	0.407858
0.0737449	0.285543	0.40378	0.407006
0.0732113	0.285399	0.402382	0.406178
0.0738608	0.285255	0.401008	0.405384
0.073803	0.285112	0.399649	0.404621
0.0731997	0.28497	0.398301	0.403909
0.0725717	0.284829	0.396963	0.403232
0.0719827	0.284689	0.395636	0.402573
0.0717785	0.28455	0.39432	0.401908
0.0717313	0.284412	0.393017	0.401234
0.0716849	0.284275	0.391726	0.400553
0.0716387	0.284139	0.389643	0.399859
0.0715927	0.284004	0.388271	0.408176
0.0715467	0.28387	0.386958	0.407294
0.0715008	0.283736	0.385404	0.406181
0.0714551	0.283603	0.383889	0.405047
0.0714095	0.283472	0.382377	0.403953
0.0713641	0.287406	0.380949	0.402887
0.0713187	0.286166	0.379615	0.401947
0.0712737	0.28459	0.378362	0.401163
0.0712289	0.283235	0.37718	0.400495
0.0711845	0.282142	0.376267	0.399918
0.0711402	0.281189	0.375963	0.39931
0.0710964	0.279923	0.374883	0.398788
0.071053	0.279114	0.37381	0.398247
0.0710101	0.278326	0.372779	0.397729
0.0709677	0.277606	0.371783	0.399263
0.0709256	0.282298	0.370807	0.398839
0.0708839	0.28119	0.370385	0.399369
0.0708425	0.279972	0.370104	0.398818
0.0708014	0.279012	0.369166	0.398273
0.0707607	0.278223	0.368246	0.397808
0.0707201	0.277545	0.367261	0.397425
0.0706798	0.277006	0.366739	0.397149
0.0706397	0.276595	0.366453	0.396999
0.0705998	0.276281	0.366155	0.396953
0.0705601	0.276031	0.365853	0.396971
0.0705205	0.27582	0.365553	0.397015
0.0704811	0.275629	0.365259	0.397062
0.0704418	0.275458	0.364973	0.3971
0.0704027	0.275424	0.364156	0.39712
0.0703636	0.275462	0.363885	0.397113
0.0703247	0.275497	0.363615	0.39709
0.0702859	0.275496	0.36253	0.397054
0.0702472	0.275442	0.362247	0.397014
0.0702083	0.275325	0.361964	0.396978
0.0701696	0.275138	0.361678	0.396946
0.0701311	0.275593	0.361388	0.396927
0.0700928	0.275155	0.361095	0.396953
0.0700546	0.27464	0.3608	0.39702
0.0700165	0.274067	0.360506	0.397107
0.0699784	0.273541	0.360211	0.397201
0.0699404	0.273038	0.359918	0.3973
0.0699025	0.272563	0.359627	0.397395
0.0698647	0.272126	0.359338	0.397478
0.069827	0.271726	0.359051	0.397544
0.0697894	0.27136	0.358766	0.397002
0.069752	0.271024	0.358483	0.397022
0.0697146	0.270713	0.358202	0.396917
0.0696773	0.270424	0.357922	0.396786
0.0696402	0.270152	0.357644	0.396611
0.0696032	0.270004	0.357367	0.396402
0.0695664	0.269858	0.3564	0.396869
0.0695296	0.269715	0.35613	0.396358
0.0694928	0.269572	0.354917	0.395511
0.0694561	0.269431	0.353693	0.394642
0.0694195	0.269291	0.352482	0.393886
0.0693831	0.269151	0.351276	0.393219
0.0693468	0.269013	0.350051	0.392568
0.0693107	0.268875	0.348808	0.391908
0.0692748	0.268738	0.347602	0.391229
0.069239	0.273829	0.34722	0.390541
0.0692034	0.275013	0.346789	0.38984
0.0691679	0.274786	0.346546	0.389128
0.0691327	0.274448	0.345467	0.388414
0.0690977	0.274162	0.34427	0.387693
0.0690628	0.273897	0.343078	0.386965
0.069028	0.273701	0.341918	0.386225
0.0689934	0.273636	0.341378	0.385472
0.0689589	0.273687	0.341044	0.384701
0.0689245	0.273822	0.340409	0.382916
0.0688904	0.274001	0.340125	0.382095
0.0688564	0.27421	0.338276	0.381289
0.0688226	0.274459	0.336995	0.380467
0.068789	0.274775	0.335773	0.379638
0.0690747	0.275105	0.334616	0.378808
0.069046	0.275424	0.333072	0.377989
0.0690128	0.275713	0.33282	0.377234
0.068981	0.275963	0.332802	0.376621
0.0689504	0.276169	0.331898	0.376218
0.06892	0.276333	0.33099	0.375931
0.0688897	0.276455	0.328919	0.375693
0.0691656	0.276538	0.327063	0.375453
0.0687967	0.276587	0.325312	0.375192
0.0684339	0.276613	0.323607	0.374907
0.0681245	0.276622	0.321997	0.374595
0.0680927	0.276621	0.320548	0.374256
0.0680604	0.276613	0.319225	0.37389
0.0680289	0.2766	0.31833	0.373496
0.0679976	0.276584	0.318084	0.373076
0.0679668	0.276567	0.317558	0.372635
0.0679362	0.276547	0.316243	0.372551
0.067906	0.276523	0.314974	0.371927
0.067876	0.276495	0.313819	0.371202
0.0678462	0.276464	0.31278	0.370474
0.0678165	0.276431	0.311522	0.369749
0.0677869	0.276391	0.310373	0.369002
0.0677574	0.276346	0.309342	0.368211
0.0677279	0.276293	0.308359	0.367367
0.0676984	0.27623	0.306772	0.366466
0.067669	0.276154	0.305246	0.365548
0.0676395	0.276064	0.304275	0.364641
0.06761	0.275961	0.303297	0.363751
0.0675805	0.275845	0.302315	0.362877
0.0675511	0.275719	0.301323	0.362011
0.0675217	0.275621	0.300386	0.361153
0.0674923	0.27554	0.299299	0.360365
0.0674629	0.275462	0.298167	0.359569
0.0674336	0.275387	0.297072	0.358753
0.0674044	0.275314	0.296156	0.357887
0.0673752	0.275243	0.294466	0.357017
0.0673461	0.275171	0.293128	0.35614
0.067317	0.275099	0.292106	0.355306
0.0672879	0.275027	0.290748	0.354517
0.0672589	0.274953	0.289632	0.353768
0.06723	0.274878	0.288561	0.353053
0.0672011	0.274803	0.287499	0.352375
0.0671723	0.274727	0.28643	0.351724
0.0671435	0.274651	0.285349	0.351096
0.0671149	0.274575	0.284777	0.350482
0.0670862	0.274498	0.284517	0.350061
0.0670577	0.274422	0.284264	0.349783
0.0670292	0.274346	0.284017	0.349505
0.0670008	0.27427	0.283773	0.34924
0.0669724	0.274194	0.283084	0.348989
0.0669441	0.273373	0.282853	0.348737
0.0669158	0.27329	0.282617	0.348487
0.0668876	0.273216	0.282374	0.34825
0.0668593	0.273135	0.28213	0.348
0.0668312	0.273056	0.282381	0.34776
0.0664747	0.272979	0.280863	0.346952
0.0661191	0.272904	0.279347	0.346156
0.0657632	0.272768	0.277905	0.345408
0.0654052	0.272611	0.276587	0.34409
0.0653307	0.272534	0.275348	0.343393
0.0653017	0.272459	0.274169	0.3421
0.065273	0.272383	0.273029	0.341379
0.0652446	0.272309	0.272751	0.340617
0.0652166	0.272237	0.272505	0.33988
0.0651888	0.272166	0.272263	0.339172
0.0651613	0.272097	0.272023	0.338492
0.065134	0.272029	0.271784	0.337575
0.0651068	0.271961	0.271548	0.336914
0.065113	0.271895	0.271312	0.336235
0.0650877	0.271829	0.271078	0.335585
0.0650614	0.271763	0.270845	0.334981
0.0650326	0.271699	0.270613	0.334398
0.065004	0.271636	0.269547	0.333833
0.0649753	0.271573	0.268501	0.333288
0.064947	0.27151	0.267482	0.33311
0.0649187	0.271448	0.266493	0.332934
0.0648907	0.271385	0.265527	0.33276
0.0648627	0.271322	0.265178	0.332587
0.0648351	0.271259	0.264955	0.332414
0.0648078	0.271197	0.264733	0.331541
0.0647808	0.271134	0.264062	0.33137
0.0647543	0.271072	0.263836	0.331201
0.0647281	0.27101	0.263405	0.331026
0.0647022	0.270949	0.263178	0.330851
0.0646767	0.270888	0.262956	0.330674
0.0646513	0.270828	0.26273	0.330496
0.0646261	0.270764	0.261694	0.330317
0.0646009	0.270698	0.260663	0.330138
0.0645758	0.270639	0.259973	0.32996
0.0645507	0.270583	0.259749	0.329782
0.0645258	0.270524	0.259527	0.329606
0.0645006	0.270465	0.259308	0.329431
0.0644753	0.270406	0.259089	0.329258
0.0644498	0.270348	0.258497	0.329087
0.0644243	0.270291	0.257397	0.328918
0.0643986	0.270234	0.256273	0.32875
0.0643728	0.270179	0.255161	0.328584
0.0643469	0.270124	0.254058	0.328419
0.0643208	0.27007	0.253537	0.328255
0.0642947	0.270016	0.253286	0.328091
0.0642685	0.269888	0.252607	0.327928
0.0642421	0.269738	0.252259	0.327757
0.0642158	0.269569	0.252035	0.327594
0.0641895	0.269451	0.251814	0.327432
0.0641632	0.269405	0.251668	0.32727
0.0641368	0.26936	0.25145	0.327108
0.0641103	0.269313	0.251108	0.326945
0.0640839	0.269265	0.250884	0.326783
0.0640576	0.269215	0.249633	0.326613
0.0640312	0.269164	0.248413	0.326449
0.0640049	0.269111	0.247284	0.326286
0.0639786	0.269058	0.246577	0.326193
0.0639524	0.269004	0.247068	0.325796
0.0639262	0.26895	0.245782	0.325376
0.0638999	0.268897	0.244424	0.325631
0.0638738	0.268844	0.243145	0.325875
0.0638479	0.268791	0.24195	0.325079
0.0638217	0.268739	0.240838	0.324269
0.0637951	0.268687	0.2398	0.323642
0.063769	0.268635	0.238824	0.322744
0.0637429	0.268583	0.237902	0.32239
0.0637166	0.268532	0.237027	0.322162
0.0636903	0.26848	0.236187	0.322028
0.063664	0.268429	0.235368	0.321957
0.0636378	0.268378	0.234565	0.321917
0.0636116	0.268327	0.233763	0.321886
0.0635854	0.268276	0.232958	0.321857
0.0635593	0.268225	0.232144	0.32183
0.0635332	0.268174	0.231319	0.321786
0.0635071	0.267987	0.230481	0.32173
0.063481	0.267792	0.229626	0.32167
0.0634549	0.267596	0.228753	0.321583
0.0634289	0.267402	0.227862	0.32146
0.0634028	0.267211	0.226951	0.321321
0.0633769	0.267175	0.226025	0.321159
0.0633509	0.267134	0.225086	0.321095
0.063325	0.267089	0.224138	0.320963
0.0632991	0.267039	0.223184	0.320836
0.0632733	0.266986	0.22223	0.320722
0.0632475	0.266931	0.221281	0.320635
0.0632218	0.266875	0.22034	0.320579
0.0631961	0.266818	0.219408	0.320533
0.0631704	0.266761	0.218486	0.320499
0.0631448	0.266703	0.217573	0.320624
0.0631192	0.266647	0.216668	0.311005
0.0630936	0.26659	0.215768	0.309642
0.0630681	0.266535	0.214869	0.30833
0.0630426	0.266479	0.213967	0.30704
0.0630172	0.266424	0.21354	0.305789
0.0629918	0.26637	0.213402	0.304592
0.0629664	0.266316	0.213266	0.303457
0.062941	0.266262	0.21313	0.302368
0.0629157	0.266209	0.212838	0.301739
0.0628904	0.266156	0.212691	0.300747
0.0628651	0.266103	0.21341	0.2996
0.0628399	0.266051	0.212154	0.298413
0.0628147	0.265999	0.210889	0.296912
0.0627896	0.265947	0.209716	0.295615
0.0627645	0.265896	0.208578	0.294217
0.0627394	0.265845	0.207491	0.292771
0.0627145	0.265794	0.206437	0.291271
0.0626895	0.265744	0.20543	0.289714
0.0626645	0.265694	0.205198	0.288095
0.0626395	0.265645	0.205059	0.286413
0.0626147	0.265596	0.204923	0.284665
0.0625898	0.265546	0.204789	0.282855
0.062565	0.265496	0.204654	0.280992
0.0625402	0.265447	0.204519	0.278938
0.0625155	0.265398	0.204382	0.276945
0.0624907	0.26535	0.204243	0.27486
0.062466	0.265303	0.204102	0.27282
0.0624414	0.265255	0.203959	0.270847
0.0624168	0.265208	0.203815	0.268926
0.0623922	0.265161	0.203669	0.266632
0.0623676	0.265113	0.203522	0.264809
0.0623431	0.265066	0.203374	0.262981
0.0623186	0.265019	0.203227	0.261205
0.0622942	0.264972	0.20308	0.259491
0.0622698	0.264925	0.202933	0.257829
0.0622455	0.264879	0.202787	0.254907
0.0622212	0.264832	0.202641	0.254542
0.0621969	0.264786	0.202497	0.254203
0.0621726	0.26474	0.202354	0.253891
0.0621484	0.264694	0.201951	0.2536
0.0621242	0.264648	0.20181	0.25333
0.0621001	0.264603	0.201671	0.253075
0.062076	0.264558	0.201537	0.252829
0.0620519	0.264513	0.201396	0.25259
0.062028	0.264468	0.201258	0.252356
0.0620039	0.264424	0.201117	0.252125
0.0619798	0.264379	0.200978	0.2519
0.0619558	0.264335	0.200522	0.25168
0.0619319	0.26429	0.199504	0.251479
0.0619079	0.264245	0.198858	0.253191
0.0618841	0.264201	0.198716	0.253396
0.0618603	0.264157	0.198574	0.253623
0.0618365	0.264114	0.19812	0.254176
0.0618128	0.264071	0.197991	0.25499
0.0617891	0.264028	0.197825	0.255897
0.0617654	0.263985	0.197658	0.256875
0.0617418	0.263943	0.197485	0.257916
0.0617181	0.2639	0.197316	0.258994
0.0616946	0.263858	0.197144	0.260085
0.061671	0.263816	0.196976	0.261161
0.0616475	0.263773	0.196809	0.255934
0.061624	0.263731	0.196643	0.25568
0.0616006	0.263689	0.196681	0.25543
0.0615772	0.263647	0.195774	0.255177
0.0615538	0.263605	0.194954	0.254954
0.0614528	0.263563	0.193855	0.254786
0.0614319	0.263521	0.192745	0.254704
0.0614078	0.263479	0.191664	0.254726
0.0613841	0.263438	0.190615	0.254791
0.0613594	0.263396	0.189584	0.254862
0.0613359	0.263354	0.188567	0.254912
0.0613122	0.263312	0.187572	0.254932
0.0612889	0.263271	0.186607	0.254912
0.0612656	0.263229	0.185672	0.254867
0.0612423	0.263188	0.185659	0.254866
0.0612188	0.263146	0.185479	0.254835
0.0611955	0.263105	0.185315	0.260818
0.0611722	0.263063	0.184354	0.260904
0.061149	0.263022	0.183805	0.261239
0.0611259	0.26298	0.183635	0.262897
0.061103	0.262939	0.183469	0.264828
0.0610801	0.262897	0.183107	0.266495
0.0610574	0.262856	0.182135	0.267811
0.0610347	0.262815	0.181837	0.268829
0.0610121	0.262774	0.181689	0.269585
0.0609895	0.262733	0.181547	0.270162
0.0609669	0.262691	0.181407	0.270614
0.0609444	0.26265	0.18127	0.270986
0.0609218	0.262609	0.181133	0.271288
0.0608993	0.262568	0.180998	0.271538
0.0608767	0.262527	0.18086	0.271739
0.0607389	0.262486	0.181136	0.271888
0.0607113	0.262446	0.180987	0.271975
0.0606865	0.262405	0.18085	0.271995
0.0606624	0.262364	0.180709	0.271948
0.0606385	0.262324	0.180576	0.271174
0.0606134	0.262283	0.179485	0.270934
0.0605885	0.262243	0.178387	0.27064
0.0605637	0.262202	0.177512	0.270289
0.0605394	0.262162	0.177369	0.269884
0.0605159	0.262122	0.177228	0.269419
0.0604933	0.262082	0.177092	0.268893
0.0604712	0.262041	0.176697	0.268316
0.0601281	0.262001	0.176569	0.26769
0.0597897	0.261961	0.176435	0.267026
0.0594547	0.261921	0.176299	0.266332
0.0591229	0.261882	0.176162	0.265613
0.0587929	0.261842	0.176029	0.26487
0.0584624	0.261802	0.175895	0.264102
0.0581295	0.261763	0.175764	0.26331
0.0577929	0.261723	0.175634	0.262488
0.0575633	0.261684	0.175506	0.262567
0.0575442	0.261644	0.17538	0.262678
0.0575251	0.261605	0.175256	0.262719
0.0575058	0.261566	0.175132	0.262702
0.0574863	0.261527	0.175008	0.262656
0.0574666	0.261488	0.174884	0.262314
0.0574467	0.261449	0.17476	0.262082
0.0574266	0.26141	0.174635	0.261843
0.0574064	0.261371	0.174512	0.261593
0.057386	0.261345	0.174385	0.261348
0.0573652	0.2613	0.174258	0.261111
0.0573442	0.261256	0.174235	0.260874
0.0573233	0.261215	0.174148	0.260609
0.0573024	0.261176	0.17303	0.260283
0.0572814	0.261137	0.17194	0.259867
0.0572604	0.2611	0.170903	0.259341
0.0572392	0.261062	0.169899	0.258705
0.0572194	0.261024	0.169245	0.257971
0.0571974	0.260986	0.169096	0.257156
0.0571751	0.260948	0.168977	0.256281
0.0571528	0.26091	0.169539	0.25536
0.0571308	0.260873	0.168542	0.254407
0.057109	0.260835	0.167547	0.253431
0.0570872	0.260797	0.166611	0.252439
0.0570655	0.26076	0.165804	0.251435
0.0570438	0.260723	0.165695	0.250426
0.0570221	0.260686	0.165589	0.249418
0.0570004	0.260649	0.165636	0.248417
0.0569787	0.260613	0.165526	0.247477
0.056957	0.260576	0.164704	0.246679
0.0569352	0.26054	0.163947	0.245958
0.0569135	0.260504	0.163278	0.245292
0.0568918	0.260468	0.162677	0.244667
0.05687	0.260432	0.161875	0.24408
0.0568482	0.260396	0.161785	0.243518
0.0568264	0.26036	0.161673	0.242983
0.0568046	0.260324	0.161579	0.242475
0.0567827	0.260288	0.161486	0.242058
0.0567607	0.260252	0.161396	0.241711
0.0567386	0.260217	0.16131	0.24136
0.0567166	0.260181	0.161225	0.241057
0.0566945	0.260145	0.160759	0.240767
0.0566723	0.26011	0.16033	0.240008
0.0566501	0.260074	0.160254	0.239748
0.0566278	0.260039	0.160171	0.239494
0.0566054	0.260003	0.160086	0.23924
0.056583	0.259968	0.160001	0.23899
0.0565605	0.259932	0.159918	0.238741
0.056538	0.259897	0.159832	0.238492
0.0565155	0.259862	0.159399	0.238244
0.0564929	0.259827	0.159167	0.237969
0.0564703	0.259792	0.159076	0.237745
0.0564477	0.259756	0.158758	0.237488
0.056425	0.259721	0.158193	0.237227
0.0564023	0.259686	0.15756	0.236962
0.0563796	0.259651	0.157006	0.236687
0.0563568	0.259616	0.156374	0.236402
0.056334	0.25958	0.155536	0.236105
0.0563113	0.259545	0.154715	0.235796
0.0562885	0.25951	0.153915	0.235475
0.0562657	0.259475	0.152894	0.235143
0.0562429	0.25944	0.151843	0.2348
0.05622	0.259405	0.151534	0.234444
0.0561971	0.25937	0.151163	0.234091
0.0561743	0.259335	0.151056	0.233735
0.0561514	0.2593	0.150948	0.233379
0.0561285	0.259265	0.150842	0.233025
0.0561085	0.25923	0.150739	0.232678
0.0560857	0.259196	0.150639	0.23234
0.0560629	0.259161	0.150543	0.232029
0.0560399	0.259126	0.150451	0.231738
0.0560168	0.259092	0.150363	0.231596
0.0559938	0.259057	0.150278	0.231509
0.0559707	0.259023	0.150194	0.231427
0.0559476	0.25899	0.15011	0.231348
0.0559246	0.258951	0.150027	0.231272
0.0559016	0.258911	0.149943	0.231197
0.0558787	0.258877	0.149858	0.231123
0.0558558	0.258862	0.149773	0.231051
0.055833	0.258826	0.149686	0.230972
0.0558102	0.25879	0.149599	0.230898
0.0554316	0.258753	0.149511	0.23083
0.0550554	0.258716	0.149422	0.230756
0.0546885	0.258679	0.149333	0.230685
0.0543452	0.258643	0.149245	0.230615
0.0540275	0.258608	0.149157	0.230546
0.0537309	0.258572	0.14907	0.230478
0.0534556	0.258537	0.14867	0.23041
0.0532644	0.258502	0.148592	0.230344
0.0532471	0.258467	0.148144	0.230279
0.0532297	0.258432	0.148053	0.230214
0.0532123	0.258398	0.14796	0.230149
0.0531949	0.258363	0.14787	0.230085
0.0531775	0.258329	0.14778	0.230021
0.0531601	0.258295	0.147692	0.229957
0.0531426	0.258261	0.147607	0.229893
0.0531251	0.258227	0.147484	0.22983
0.0531077	0.258193	0.147402	0.229766
0.0530903	0.258159	0.147329	0.229703
0.0530729	0.258125	0.147252	0.230798
0.0530555	0.258091	0.147177	0.23191
0.0530381	0.258058	0.1471	0.233035
0.0530207	0.258024	0.147024	0.234164
0.0530033	0.257991	0.146946	0.23529
0.0529858	0.257958	0.146868	0.236406
0.0529684	0.257924	0.14679	0.237507
0.052951	0.257891	0.146711	0.238589
0.0529335	0.257858	0.146633	0.239646
0.0529161	0.257825	0.146553	0.240677
0.0528987	0.257791	0.146473	0.24168
0.0528813	0.257758	0.146395	0.242654
0.0528639	0.257725	0.146319	0.243596
0.0528465	0.257692	0.146241	0.24451
0.0528292	0.257659	0.146163	0.245388
0.0528119	0.257626	0.146086	0.246232
0.0527947	0.257592	0.146009	0.247042
0.0527774	0.257559	0.145933	0.247819
0.0527601	0.257526	0.145858	0.248563
0.052743	0.257493	0.145782	0.249278
0.0527258	0.25746	0.145707	0.24997
0.0527087	0.257427	0.145632	0.250643
0.0526916	0.257393	0.145557	0.251304
0.0526745	0.25736	0.145482	0.251958
0.0526574	0.257327	0.145407	0.252609
0.0526404	0.257294	0.145001	0.25326
0.0526234	0.257261	0.144919	0.253912
0.0526064	0.257228	0.144842	0.254571
0.0525894	0.257195	0.144767	0.25524
0.0525725	0.257163	0.14469	0.255922
0.0525557	0.257129	0.144613	0.256621
0.0525388	0.257095	0.144536	0.257339
0.0525219	0.257062	0.14446	0.258072
0.0525051	0.257028	0.144384	0.258822
0.0524882	0.256995	0.144309	0.259587
0.0524714	0.256961	0.144234	0.260362
0.0524546	0.256928	0.14416	0.261144
0.0524378	0.256895	0.144086	0.261924
0.052421	0.256862	0.144013	0.262694
0.0524043	0.25683	0.14394	0.263447
0.0523875	0.256797	0.143867	0.264178
0.0523708	0.256764	0.143795	0.264886
0.0523542	0.256731	0.143724	0.265568
0.0523375	0.256698	0.143652	0.266226
0.0523209	0.256665	0.143581	0.266857
0.0523043	0.256632	0.143509	0.26746
0.0522877	0.2566	0.143438	0.268036
0.0522715	0.256567	0.14303	0.268589
0.0522541	0.256535	0.142957	0.268713
0.0522361	0.256503	0.142885	0.268678
0.0522195	0.25647	0.142812	0.268642
0.0522037	0.256438	0.142737	0.268605
0.0521867	0.256406	0.142661	0.268568
0.0521695	0.256374	0.142585	0.268529
0.0521525	0.256342	0.14251	0.268489
0.0521354	0.25631	0.142436	0.268448
0.0521185	0.256278	0.142362	0.268406
0.0521016	0.256246	0.14229	0.268363
0.0520849	0.256214	0.142218	0.268321
0.0520682	0.256182	0.142148	0.268278
0.0520517	0.25615	0.141808	0.268236
0.0520352	0.256118	0.141743	0.268193
0.0520187	0.256086	0.141672	0.268152
0.0520022	0.256074	0.141602	0.268111
0.0519857	0.256051	0.14153	0.26807
0.0519693	0.256025	0.141457	0.268031
0.051953	0.255994	0.141483	0.267992
0.0519366	0.255962	0.141272	0.267953
0.0519203	0.255929	0.141186	0.267915
0.0519041	0.255896	0.141108	0.267878
0.0518878	0.255862	0.140251	0.267842
0.0518716	0.255827	0.139924	0.267806
0.0518556	0.255792	0.139846	0.267249
0.0518395	0.255757	0.13977	0.267237
0.0518234	0.255722	0.139445	0.267198
0.0518074	0.255687	0.139373	0.26774
0.0517913	0.255652	0.139298	0.268228
0.0517753	0.255617	0.139225	0.268719
0.0517594	0.255582	0.139151	0.26923
0.0517435	0.255547	0.139079	0.269761
0.0517277	0.255513	0.139008	0.270311
0.0517119	0.255479	0.138938	0.270863
0.0516963	0.255444	0.138869	0.271112
0.0516806	0.255411	0.138801	0.271081
0.051665	0.255377	0.138734	0.27105
0.0516493	0.255343	0.138788	0.271018
0.0516338	0.25531	0.138718	0.270984
0.0516182	0.255276	0.138633	0.27095
0.0516024	0.255243	0.138559	0.270916
0.0515867	0.25521	0.138485	0.270882
0.0515711	0.255177	0.1381	0.270848
0.0515556	0.255143	0.137077	0.270816
0.0515401	0.25511	0.136059	0.270786
0.0515246	0.255077	0.135102	0.270758
0.0515091	0.255044	0.134421	0.270731
0.0514936	0.255011	0.134089	0.270705
0.0514782	0.254978	0.13402	0.27068
0.0514629	0.254941	0.13395	0.270655
0.0514475	0.25491	0.133882	0.270632
0.0514322	0.254875	0.133814	0.270609
0.0514169	0.254842	0.133747	0.270185
0.0514017	0.254808	0.133681	0.270328
0.0513865	0.254772	0.133617	0.270702
0.0513714	0.254734	0.133555	0.270762
0.0513562	0.254696	0.133494	0.270578
0.0513411	0.254658	0.133434	0.270419
0.0513261	0.254619	0.133376	0.270292
0.0513112	0.25458	0.133319	0.270182
0.0512963	0.254541	0.133262	0.270085
0.0512814	0.254502	0.133205	0.269992
0.0512666	0.254463	0.133149	0.269902
0.0512517	0.254425	0.133094	0.269813
0.0512369	0.254386	0.132863	0.269724
0.0512223	0.254348	0.132809	0.269634
0.0512076	0.254309	0.132523	0.269544
0.051193	0.254271	0.132188	0.269448
0.0511784	0.254233	0.132128	0.269352
0.0511638	0.254195	0.132067	0.269256
0.0511493	0.254157	0.132005	0.269158
0.0511349	0.25412	0.131921	0.269058
0.0511204	0.254083	0.131859	0.268959
0.051106	0.254046	0.131796	0.268861
0.0510912	0.254009	0.131735	0.268764
0.0510767	0.25397	0.131126	0.268664
0.0510624	0.253931	0.131064	0.268566
0.0510479	0.253893	0.131005	0.268468
0.0510335	0.253855	0.130948	0.268372
0.051022	0.253819	0.130891	0.268277
0.0510086	0.253783	0.130836	0.268961
0.0509951	0.253748	0.130781	0.269586
0.0509809	0.253712	0.130727	0.270015
0.0509666	0.253677	0.130673	0.27038
0.0509521	0.253641	0.130619	0.270715
0.0509376	0.253606	0.130565	0.271013
0.050923	0.25357	0.130511	0.271323
0.0509084	0.253535	0.130457	0.271638
0.0508938	0.2535	0.130402	0.271965
0.0508792	0.253465	0.130348	0.279653
0.0508647	0.253431	0.130293	0.279849
0.0508503	0.253396	0.130238	0.280165
0.0508359	0.253362	0.130183	0.280447
0.0508217	0.253327	0.130128	0.280746
0.0508075	0.253293	0.130072	0.281049
0.0507933	0.253259	0.130017	0.281349
0.0507792	0.253226	0.129961	0.281635
0.0507652	0.253192	0.129906	0.281907
0.0507513	0.253159	0.12985	0.282157
0.0507373	0.253125	0.129795	0.282391
0.0507235	0.253092	0.12974	0.282612
0.0507096	0.253059	0.129684	0.282827
0.0506958	0.253027	0.129629	0.282471
0.0506821	0.252994	0.129574	0.28279
0.0506685	0.252962	0.12952	0.282933
0.0506549	0.25293	0.129466	0.2831
0.0506416	0.252898	0.129416	0.283284
0.0506283	0.252866	0.129364	0.283498
0.0506149	0.252834	0.129311	0.282921
0.0506016	0.252803	0.129258	0.283192
0.0505883	0.252772	0.129204	0.283452
0.050575	0.252741	0.129151	0.283673
0.0505618	0.25271	0.129097	0.283878
0.0505488	0.25268	0.128956	0.284076
0.0505356	0.25265	0.128899	0.284267
0.0505224	0.25262	0.128845	0.284455
0.0505092	0.25259	0.128789	0.284639
0.0504961	0.25256	0.128733	0.28482
0.0504831	0.25253	0.128676	0.284998
0.0504701	0.252501	0.128618	0.285175
0.0504572	0.252472	0.128561	0.28535
0.0504428	0.252443	0.128504	0.285522
0.0504299	0.252414	0.128448	0.285692
0.050417	0.252385	0.128392	0.285858
0.0504041	0.252357	0.128337	0.286021
0.0503909	0.252328	0.128282	0.286179
0.0503776	0.2523	0.128227	0.286334
0.0503641	0.252272	0.128172	0.286484
0.0503506	0.252244	0.128117	0.286631
0.050337	0.252216	0.128063	0.286774
0.0503235	0.252188	0.128009	0.286914
0.05031	0.25216	0.127733	0.287051
0.0502965	0.252133	0.12768	0.287186
0.0502827	0.252106	0.127574	0.287318
0.0502694	0.252078	0.127385	0.287449
0.0502518	0.252051	0.127321	0.287578
0.0502387	0.252024	0.12726	0.287704
0.0502301	0.251997	0.127195	0.28783
0.0502174	0.25197	0.12713	0.287954
0.0502003	0.253422	0.127064	0.288077
0.0501874	0.253374	0.126843	0.288201
0.0501789	0.253366	0.126779	0.288327
0.0501663	0.253216	0.126718	0.288457
0.0501492	0.252998	0.126659	0.288593
0.0501364	0.252801	0.126602	0.288733
0.0501278	0.252685	0.126547	0.288877
0.0501152	0.25258	0.126493	0.289026
0.0500982	0.252488	0.12644	0.289173
0.0500853	0.252449	0.126388	0.289311
0.0500767	0.252463	0.126249	0.289433
0.0500639	0.252485	0.126014	0.289536
0.0500465	0.252508	0.125954	0.289617
0.0500334	0.252568	0.125894	0.289676
0.0500246	0.252657	0.125839	0.289716
0.0500116	0.252731	0.125784	0.289625
0.0499943	0.252787	0.125725	0.289642
0.0499813	0.252858	0.125668	0.289588
0.0499726	0.252944	0.12561	0.289503
0.0499598	0.253005	0.125552	0.289408
0.0499427	0.253032	0.125494	0.289313
0.0499297	0.253056	0.125436	0.289233
0.0499212	0.252334	0.125378	0.28917
0.0499086	0.251531	0.125319	0.289124
0.0498916	0.251447	0.125261	0.289089
0.0498789	0.251365	0.125194	0.289066
0.0498707	0.251275	0.125139	0.289056
0.0498583	0.25114	0.12424	0.289058
0.0498416	0.250962	0.123394	0.289071
0.0498291	0.250785	0.12259	0.289088
0.0498211	0.25062	0.121815	0.289104
0.0498091	0.250431	0.121063	0.28911
0.0497926	0.250216	0.120329	0.289105
0.0497805	0.250022	0.119616	0.289086
0.0497728	0.24983	0.118922	0.289052
0.0497611	0.24964	0.118243	0.289006
0.0497451	0.249451	0.117743	0.288952
0.0497331	0.249263	0.11767	0.28889
0.0497255	0.249076	0.117618	0.288824
0.0497137	0.24889	0.117566	0.288765
0.0496973	0.24871	0.117515	0.288711
0.0496853	0.248537	0.117464	0.288669
0.0496776	0.248373	0.117413	0.288642
0.0496658	0.248218	0.117361	0.288635
0.0496494	0.248073	0.11731	0.288649
0.0496372	0.247179	0.117259	0.288682
0.0496294	0.24706	0.117209	0.288732
0.0496172	0.246958	0.117413	0.288795
0.0496004	0.246858	0.117363	0.288854
0.0495879	0.246763	0.117312	0.288906
0.0495797	0.246677	0.117261	0.288941
0.0495673	0.246601	0.116541	0.288956
0.04955	0.24653	0.116327	0.288956
0.0495368	0.246465	0.116275	0.288946
0.0495279	0.246412	0.116224	0.288929
0.0495147	0.246392	0.116173	0.288908
0.0494968	0.246376	0.116122	0.288886
0.0494832	0.246361	0.116072	0.288865
0.0494741	0.246347	0.116023	0.288846
0.0494602	0.246333	0.116026	0.288827
0.0494417	0.24632	0.115915	0.288811
0.0494275	0.246308	0.116155	0.288799
0.0494179	0.246295	0.116081	0.288794
0.0494041	0.246283	0.115312	0.28879
0.0493856	0.246271	0.114533	0.288789
0.0493716	0.246259	0.113801	0.288795
0.049362	0.246246	0.112982	0.288812
0.0493481	0.246234	0.112178	0.288834
0.0493297	0.246221	0.111518	0.288859
0.0493158	0.246207	0.110912	0.288884
0.0493066	0.246192	0.110185	0.288907
0.0492932	0.246176	0.109697	0.288935
0.0492753	0.246159	0.10953	0.288974
0.0492619	0.246141	0.109475	0.289028
0.0492531	0.246122	0.109425	0.289097
0.04924	0.246103	0.109378	0.289184
0.0492224	0.246083	0.109333	0.289271
0.0492093	0.246062	0.10929	0.289161
0.0492007	0.24604	0.109248	0.289052
0.0491878	0.246016	0.109205	0.288943
0.0491702	0.245992	0.109163	0.288836
0.0491569	0.245968	0.109121	0.288382
0.0491482	0.245943	0.109079	0.288274
0.0491353	0.245917	0.108921	0.288196
0.0491175	0.245891	0.109017	0.288114
0.0491044	0.245864	0.108972	0.288064
0.0490961	0.245837	0.108931	0.288047
0.0490832	0.245809	0.108332	0.288055
0.0490655	0.245781	0.107751	0.288088
0.0490524	0.245752	0.108147	0.288069
0.0490441	0.245723	0.107509	0.287964
0.0490312	0.245693	0.106828	0.287863
0.0490135	0.245662	0.106404	0.287764
0.0490004	0.245631	0.105815	0.287668
0.048992	0.2456	0.105271	0.287573
0.0489791	0.245568	0.104774	0.287479
0.0489613	0.245535	0.104532	0.287384
0.0489481	0.245502	0.104494	0.287292
0.0489396	0.245465	0.104458	0.287199
0.0489265	0.245429	0.104423	0.287108
0.0489087	0.245394	0.104388	0.287017
0.0488954	0.245357	0.104355	0.286926
0.0488869	0.24532	0.105051	0.286837
0.0488737	0.24528	0.104539	0.286748
0.0488558	0.24524	0.103993	0.28666
0.0488425	0.245198	0.103459	0.286572
0.048834	0.245156	0.102934	0.286485
0.0488209	0.245113	0.102416	0.286398
0.0488029	0.24507	0.101903	0.286313
0.0487895	0.245027	0.101393	0.286228
0.0487808	0.244983	0.101354	0.286143
0.0487675	0.24494	0.101316	0.286059
0.0487494	0.244896	0.101277	0.285975
0.0487359	0.244853	0.101239	0.285892
0.048727	0.244802	0.101202	0.285809
0.0487137	0.244759	0.101164	0.285727
0.0486955	0.244715	0.102122	0.285646
0.048682	0.244676	0.102451	0.285565
0.0486733	0.244635	0.101907	0.285484
0.04866	0.244592	0.101415	0.285404
0.0486418	0.244549	0.101092	0.285324
0.0486283	0.243772	0.100919	0.285245
0.0486196	0.243739	0.100208	0.285166
0.0486063	0.243692	0.100653	0.285088
0.0485881	0.243642	0.100112	0.28501
0.0485747	0.243589	0.0995787	0.284933
0.0485661	0.243539	0.0990599	0.284855
0.0485528	0.243493	0.0985581	0.284779
0.0485347	0.243448	0.098057	0.284702
0.0485216	0.243404	0.0975614	0.284626
0.0485132	0.24336	0.0970744	0.28455
0.0485002	0.243316	0.0965945	0.284475
0.0484823	0.243274	0.0961175	0.2844
0.0484691	0.243233	0.0958415	0.284325
0.0484606	0.243193	0.0953714	0.28425
0.0484475	0.243155	0.0949004	0.284176
0.0484295	0.243122	0.0945595	0.284102
0.0484162	0.243081	0.094073	0.284028
0.0484076	0.243038	0.0935934	0.283955
0.0483944	0.242994	0.0931368	0.283881
0.0483763	0.242985	0.0927095	0.283807
0.0483628	0.242949	0.0923118	0.283732
0.0483542	0.242918	0.0919437	0.283658
0.048341	0.242876	0.0916043	0.283585
0.0483231	0.242833	0.0912824	0.283511
0.0483098	0.242785	0.0922109	0.283438
0.0483015	0.242737	0.091708	0.283366
0.0482886	0.242688	0.0911064	0.283294
0.0482709	0.24264	0.0905428	0.283222
0.0482579	0.242591	0.0900482	0.283151
0.0482499	0.242543	0.089603	0.28308
0.0482373	0.242496	0.0892798	0.283011
0.0483941	0.242448	0.0892384	0.282941
0.0487208	0.242401	0.0893531	0.282871
0.0487018	0.242354	0.0893094	0.282802
0.0486873	0.242308	0.0892725	0.282732
0.0486635	0.242263	0.0892294	0.282663
0.0486457	0.242218	0.089184	0.282594
0.0486312	0.242173	0.0891371	0.282526
0.0486122	0.24213	0.0890899	0.282458
0.0485882	0.242087	0.0890433	0.282391
0.0485691	0.242046	0.0892187	0.281972
0.0485551	0.242005	0.088981	0.281893
0.0485369	0.241966	0.0900705	0.281832
0.0485145	0.241927	0.0899214	0.281887
0.0484972	0.24189	0.0898789	0.281818
0.0484852	0.241853	0.089823	0.28115
0.048469	0.241817	0.0892619	0.280507
0.0484483	0.241782	0.0886808	0.280433
0.0484326	0.241747	0.0882123	0.280363
0.0484218	0.241713	0.0878392	0.280291
0.0484067	0.24168	0.0875473	0.280216
0.0483867	0.241647	0.0875024	0.280138
0.0483715	0.241614	0.0874592	0.280059
0.0483611	0.241581	0.0874173	0.27998
0.048346	0.241549	0.0873767	0.279901
0.0483259	0.241517	0.087337	0.279825
0.0483104	0.241485	0.087298	0.279752
0.0482996	0.241453	0.0872596	0.27968
0.0482832	0.241421	0.0872214	0.27961
0.0482624	0.241389	0.0871833	0.279543
0.0482466	0.241357	0.0871452	0.279479
0.048162	0.240575	0.087107	0.278864
0.0481434	0.240544	0.0870687	0.278796
0.0481239	0.240514	0.0870302	0.278741
0.0481061	0.240078	0.0869917	0.278683
0.0480921	0.24004	0.087016	0.278625
0.0480732	0.240012	0.0869786	0.278564
0.0480497	0.239978	0.0869343	0.278503
0.0480304	0.239941	0.0868913	0.278442
0.0480155	0.2399	0.0868487	0.278381
0.0479968	0.239857	0.0868068	0.278321
0.0479744	0.239302	0.0867655	0.27826
0.0479567	0.239233	0.0867249	0.278199
0.0479435	0.239172	0.0868079	0.278137
0.0479268	0.239123	0.0867638	0.277869
0.0478921	0.239083	0.0867891	0.277793
0.0478754	0.239049	0.0867471	0.27773
0.0478609	0.239017	0.0867032	0.277054
0.0478445	0.238986	0.0866626	0.276978
0.0477543	0.238954	0.0866208	0.276901
0.0477425	0.238922	0.0865798	0.276827
0.0477293	0.238891	0.0865388	0.276864
0.0477119	0.238859	0.0865961	0.276912
0.0476894	0.238827	0.086552	0.276846
0.0476229	0.238796	0.0865089	0.276782
0.047609	0.238766	0.0864682	0.276721
0.047511	0.238736	0.0864288	0.275995
0.0474879	0.238707	0.0863902	0.275753
0.0474687	0.238678	0.086348	0.275682
0.0474534	0.238649	0.0863061	0.275863
0.0474345	0.238619	0.0867474	0.276112
0.0474118	0.23859	0.0871864	0.276463
0.0473935	0.238559	0.0866157	0.276942
0.0473797	0.238529	0.0860812	0.277513
0.0473635	0.237752	0.0856471	0.278159
0.0473434	0.237694	0.0852647	0.278877
0.0473279	0.236926	0.0848993	0.279664
0.0473168	0.236879	0.0845244	0.280507
0.0473019	0.236844	0.0841285	0.281385
0.047283	0.236813	0.0837066	0.282272
0.0472682	0.236057	0.0836493	0.283125
0.0472575	0.236026	0.0831034	0.283918
0.0472434	0.235998	0.0825302	0.284686
0.0472247	0.235968	0.0819481	0.285384
0.0472097	0.235935	0.0816816	0.286012
0.0471986	0.235902	0.0816383	0.286577
0.0471902	0.235867	0.0815956	0.287089
0.0471726	0.235833	0.0815534	0.287555
0.0471592	0.2358	0.0815118	0.287972
0.0471452	0.235768	0.0814707	0.288335
0.0471315	0.235736	0.0814302	0.288639
0.0471173	0.235704	0.0813897	0.28888
0.0471032	0.235673	0.0813494	0.289053
0.0470888	0.235641	0.0813103	0.289162
0.0470741	0.234936	0.081271	0.28922
0.0470593	0.234906	0.0812318	0.289249
0.0470443	0.234885	0.0811923	0.289278
0.0470291	0.236178	0.0811528	0.289316
0.0470138	0.235924	0.0811133	0.289367
0.0469985	0.235674	0.0810736	0.289434
0.0469831	0.23551	0.081034	0.289518
0.0469679	0.235431	0.0809943	0.289618
0.0469527	0.235459	0.0809546	0.289728
0.0469377	0.235554	0.0809149	0.289846
0.0469228	0.235708	0.0808754	0.28997
0.0469081	0.235912	0.0808359	0.290094
0.0468935	0.236157	0.0807966	0.290215
0.0468791	0.236437	0.0807574	0.290255
0.0468649	0.236739	0.0807185	0.290181
0.0468509	0.237054	0.0806797	0.290102
0.0468371	0.237368	0.0806412	0.290073
0.0468235	0.237677	0.0806029	0.290088
0.04681	0.237975	0.0805648	0.290142
0.0467968	0.238264	0.0805269	0.290233
0.0467836	0.238536	0.0804891	0.290354
0.0467706	0.23879	0.0804516	0.290492
0.0467576	0.239026	0.0804141	0.290662
0.0467448	0.239246	0.0803769	0.290834
0.046732	0.239451	0.0803397	0.291012
0.0467193	0.239642	0.0802294	0.291186
0.0467067	0.239818	0.080189	0.291356
0.0466941	0.239981	0.080148	0.291516
0.0466816	0.240128	0.0801081	0.291662
0.0466691	0.242173	0.0800687	0.291794
0.0466567	0.242384	0.0800301	0.291913
0.0466444	0.242463	0.0799919	0.292018
0.046632	0.242528	0.079954	0.29211
0.0466197	0.242611	0.0799165	0.292192
0.0465212	0.242703	0.0798792	0.292267
0.0465081	0.24281	0.0798423	0.292037
0.0464953	0.242936	0.0798058	0.292149
0.0464831	0.243082	0.0797695	0.292234
0.046471	0.24325	0.0797334	0.291675
0.046459	0.243434	0.0796976	0.29179
0.046447	0.243634	0.0796619	0.291909
0.0464351	0.243843	0.0796262	0.292036
0.0464233	0.244059	0.0794945	0.292174
0.0464114	0.244267	0.0794586	0.292324
0.0464806	0.244451	0.0794208	0.292482
0.0464685	0.244614	0.079384	0.292643
0.0464576	0.24476	0.0793472	0.292806
0.0464457	0.244888	0.0793102	0.292608
0.0464344	0.244998	0.0792736	0.292658
0.0464227	0.245093	0.079237	0.29268
0.0464115	0.245174	0.0792008	0.292719
0.0464002	0.245228	0.0790481	0.29277
0.0463894	0.245251	0.0788789	0.292243
0.0463785	0.24525	0.0788442	0.292271
0.0463679	0.245228	0.0788075	0.292286
0.0463573	0.24519	0.0787712	0.292297
0.0463468	0.24514	0.0787342	0.292308
0.0463364	0.245081	0.0786972	0.29232
0.046326	0.245016	0.0786605	0.291636
0.0463155	0.244949	0.0786241	0.291641
0.0463051	0.244884	0.0785883	0.291645
0.0462048	0.244826	0.0785532	0.291651
0.0461948	0.244777	0.0785187	0.291658
0.0462784	0.244739	0.0784849	0.291666
0.0462666	0.244713	0.0784517	0.291674
0.0462535	0.244698	0.0784189	0.291684
0.0462391	0.244694	0.0783863	0.29167
0.0462245	0.244698	0.0783537	0.291602
0.0462095	0.244712	0.0783211	0.291534
0.0461949	0.244038	0.0782884	0.291468
0.0461804	0.244085	0.0782556	0.291401
0.0461664	0.244036	0.0782228	0.291321
0.0461527	0.243981	0.0781897	0.291396
0.0461396	0.243918	0.0781565	0.291413
0.0461269	0.243856	0.0781231	0.291401
0.0461146	0.243796	0.0780899	0.29137
0.0461028	0.243739	0.0780569	0.29133
0.0460914	0.243685	0.078024	0.291239
0.0459733	0.243634	0.0779912	0.291148
0.0459595	0.243584	0.0779584	0.291065
0.0459474	0.243537	0.0779257	0.290992
0.0459363	0.243493	0.0778931	0.29093
0.0459256	0.243451	0.0778605	0.290877
0.0459145	0.243499	0.077828	0.290831
0.045903	0.243546	0.0777956	0.29079
0.0458914	0.243465	0.0777633	0.290752
0.0458796	0.243472	0.077731	0.290715
0.0458676	0.243511	0.0776989	0.290678
0.0458915	0.243511	0.0776668	0.290637
0.0458817	0.243476	0.0776348	0.290597
0.0458711	0.243451	0.0776029	0.290556
0.0458606	0.243423	0.077571	0.290512
0.0458498	0.243395	0.0775393	0.290467
0.0458389	0.243364	0.0775077	0.29042
0.045828	0.243331	0.0774761	0.290371
0.0458169	0.243297	0.0774446	0.290322
0.0458061	0.243261	0.0774133	0.290272
0.0457951	0.243222	0.0773819	0.29022
0.0457842	0.243183	0.0773507	0.290168
0.0457733	0.243142	0.0772156	0.290118
0.0457625	0.243101	0.0771821	0.290066
0.0457515	0.243059	0.0771494	0.290015
0.0457406	0.243017	0.077117	0.289964
0.0457296	0.242974	0.0770852	0.289914
0.0457187	0.242931	0.0770533	0.289862
0.0457076	0.242888	0.0770221	0.289811
0.0456966	0.242844	0.0769911	0.289758
0.0456855	0.242801	0.0769604	0.289706
0.0456744	0.242757	0.0769298	0.289653
0.0456632	0.242714	0.0768995	0.289599
0.045552	0.242671	0.0768693	0.289545
0.0455416	0.242628	0.0767299	0.28949
0.0455298	0.242584	0.0766992	0.289435
0.0455171	0.242541	0.0766673	0.28938
0.0455042	0.242498	0.0766363	0.289324
0.0454913	0.242454	0.0766058	0.289268
0.0454786	0.24241	0.076575	0.289212
0.0454663	0.242367	0.0765445	0.289155
0.0454542	0.242323	0.076514	0.289099
0.0454425	0.242279	0.0764838	0.289042
0.0454312	0.242234	0.0764538	0.288257
0.0454202	0.24219	0.0764239	0.287923
0.0454095	0.242146	0.0763943	0.287931
0.0453991	0.242101	0.0763649	0.287914
0.0453889	0.242114	0.0763357	0.287896
0.0453789	0.242092	0.0763327	0.287884
0.0453689	0.242047	0.0763034	0.287232
0.045359	0.241999	0.0759271	0.287215
0.0453492	0.241952	0.0758962	0.287171
0.0453393	0.241903	0.0758665	0.2871
0.0453294	0.241855	0.0758366	0.287034
0.0453195	0.241807	0.0758076	0.286969
0.0453095	0.241758	0.0757786	0.286905
0.0452994	0.241711	0.0757501	0.286843
0.0452893	0.241664	0.0757218	0.286781
0.0452791	0.241617	0.0756939	0.286719
0.0452689	0.241571	0.0756661	0.286657
0.0452587	0.241524	0.0756385	0.286596
0.0452484	0.241478	0.075611	0.286536
0.0452381	0.241431	0.0755835	0.286475
0.0452279	0.241386	0.0755561	0.286415
0.0452176	0.241341	0.0755287	0.286355
0.0452074	0.241296	0.0755012	0.286295
0.0451972	0.241252	0.0754738	0.286235
0.0451871	0.241208	0.0754463	0.286175
0.045177	0.241165	0.0754189	0.286116
0.0451669	0.241123	0.0753915	0.286057
0.0451569	0.241082	0.0752589	0.285999
0.045147	0.241041	0.0752328	0.285941
0.0451371	0.241001	0.0752047	0.285882
0.0451272	0.240961	0.0751768	0.285825
0.0451174	0.240921	0.0750411	0.285767
0.0451076	0.240883	0.0750117	0.28571
0.0450979	0.240844	0.0749796	0.285652
0.0450882	0.240807	0.0749484	0.285594
0.0450785	0.240772	0.0749181	0.285537
0.0450689	0.240734	0.0748882	0.28548
0.0450594	0.240699	0.0748591	0.285421
0.0450499	0.240662	0.0748307	0.285363
0.0450404	0.240627	0.074803	0.285305
0.0450309	0.240591	0.0747758	0.285248
0.0450215	0.240556	0.0747492	0.285189
0.0450122	0.240521	0.0747229	0.285131
0.0450028	0.240487	0.0746968	0.285073
0.0449935	0.240452	0.0746709	0.285014
0.0449842	0.240419	0.074645	0.284955
0.0449748	0.240385	0.0746191	0.284894
0.0449654	0.240352	0.074593	0.284834
0.0449561	0.240319	0.0745668	0.284725
0.0449469	0.240287	0.0745405	0.284661
0.0449377	0.240255	0.074514	0.284663
0.0449286	0.240223	0.0744874	0.284333
0.0449195	0.240185	0.0744607	0.283964
0.0449104	0.240151	0.0744339	0.283676
0.0449014	0.240119	0.0744071	0.283493
0.0448924	0.240088	0.0743803	0.283385
0.0448834	0.240058	0.0743536	0.283349
0.0448745	0.240029	0.074327	0.283287
0.0448656	0.240001	0.0743005	0.283219
0.0448568	0.239973	0.0742742	0.283152
0.044848	0.239945	0.0742481	0.283086
0.0448392	0.239919	0.0742221	0.283022
0.0448305	0.239892	0.0741963	0.282958
0.0448218	0.239866	0.0741706	0.282896
0.0448131	0.239841	0.0741451	0.282835
0.0448044	0.239816	0.0741197	0.282525
0.0447958	0.239791	0.0740944	0.282457
0.0447872	0.239767	0.0740693	0.282391
0.0447787	0.239744	0.0740442	0.282423
0.0447701	0.239721	0.0740193	0.28249
0.0447617	0.239698	0.0739944	0.282601
0.0447532	0.239676	0.0739696	0.282751
0.0447448	0.239655	0.0739449	0.282883
0.0447364	0.239634	0.0739204	0.282829
0.0447281	0.239613	0.0738959	0.282775
0.0447198	0.239593	0.0738714	0.282721
0.0447115	0.239573	0.0738471	0.282667
0.0447033	0.239553	0.0738229	0.282614
0.0446951	0.239534	0.0737989	0.28256
0.0446869	0.239515	0.0737749	0.282506
0.0446788	0.239496	0.0737511	0.282452
0.0446707	0.239478	0.0737273	0.282398
0.0446626	0.239459	0.0737037	0.282343
0.0446545	0.239442	0.0736802	0.282288
0.0446465	0.239424	0.0736568	0.281919
0.0446385	0.239406	0.0736336	0.281858
0.0446305	0.239389	0.0736104	0.281807
0.0446226	0.239372	0.0735873	0.281752
0.0446147	0.239355	0.0735643	0.281696
0.0446068	0.239338	0.0735414	0.281636
0.044599	0.239322	0.0735187	0.281574
0.0445911	0.239305	0.0734959	0.281509
0.0445833	0.239289	0.0734733	0.281442
0.0445756	0.239273	0.0734508	0.281216
0.0445678	0.239257	0.0734283	0.28114
0.0445601	0.239241	0.0734059	0.281071
0.0445525	0.239226	0.0733836	0.280517
0.0445448	0.239211	0.0733614	0.280091
0.0445372	0.239196	0.0733392	0.280132
0.0445296	0.23918	0.0733172	0.280191
0.0445221	0.239165	0.0732952	0.28027
0.0445146	0.239151	0.0732733	0.280348
0.0445071	0.239136	0.0732515	0.280415
0.0444996	0.239122	0.0732297	0.28042
0.0444922	0.239107	0.0732081	0.280337
0.0444848	0.239093	0.0731865	0.280254
0.0444774	0.239079	0.073165	0.280171
0.04447	0.239065	0.0731436	0.28009
0.0444627	0.239052	0.0731222	0.28001
0.0444554	0.239038	0.073101	0.279931
0.0444481	0.239024	0.0730798	0.279159
0.0444409	0.239011	0.0730587	0.279085
0.0444336	0.238998	0.0730376	0.279012
0.0444264	0.238985	0.0730167	0.278939
0.0444193	0.238971	0.0729958	0.278868
0.0444121	0.238958	0.072975	0.278798
0.044405	0.238945	0.0729543	0.278728
0.0443979	0.238933	0.0729336	0.27866
0.0443908	0.23892	0.072913	0.278591
0.0443838	0.238907	0.0728925	0.278522
0.0443767	0.238895	0.0728721	0.278453
0.0443697	0.238882	0.0728517	0.278384
0.0443628	0.23887	0.0728314	0.278316
0.0443558	0.238858	0.0728112	0.27807
0.0443489	0.238844	0.0727911	0.277998
0.044342	0.238831	0.072771	0.278089
0.0443351	0.238818	0.072751	0.278153
0.0443283	0.238806	0.0727311	0.278212
0.0443214	0.238794	0.0727113	0.278267
0.0443146	0.238782	0.0726915	0.278309
0.0443079	0.23877	0.0726718	0.278299
0.0443011	0.238758	0.0726522	0.278224
0.0442944	0.238747	0.0726326	0.277973
0.0442877	0.238735	0.0726132	0.277902
0.044281	0.238723	0.0725938	0.277816
0.0442744	0.238712	0.0725744	0.277796
0.0442678	0.2387	0.0725551	0.277729
0.0442611	0.238689	0.0725359	0.277656
0.0442546	0.238677	0.0725168	0.277581
0.044248	0.237944	0.0724977	0.276922
0.0442415	0.237936	0.0724787	0.276832
0.0442349	0.237918	0.0724598	0.276112
0.0442284	0.2379	0.0724409	0.275935
0.0442219	0.237876	0.0724221	0.275861
0.0442155	0.237851	0.0724034	0.275705
0.044209	0.237824	0.0723848	0.275522
0.0442026	0.237797	0.0723663	0.275357
0.0441962	0.237772	0.0723479	0.275224
0.0441897	0.237753	0.0723295	0.275121
0.0441834	0.237731	0.0723112	0.275036
0.0441769	0.237711	0.072293	0.274951
0.0441703	0.237697	0.0722748	0.27476
0.0441641	0.237681	0.0722567	0.274681
0.0441576	0.237666	0.0722387	0.274399
0.0441509	0.237651	0.0722207	0.274054
0.0441447	0.237635	0.0722029	0.273743
0.0441383	0.23762	0.0721851	0.273505
0.0441318	0.237605	0.0721673	0.273413
0.0441256	0.23759	0.0721497	0.273325
0.0441194	0.237574	0.0721321	0.273235
0.044113	0.237559	0.0721146	0.273145
0.044107	0.237544	0.0720971	0.272617
0.0441009	0.237528	0.0720798	0.272522
0.0440947	0.237513	0.0720625	0.272182
0.0440889	0.237498	0.0720453	0.272089
0.0440828	0.237484	0.0720281	0.271998
0.0440768	0.237469	0.072011	0.271902
0.0440708	0.237455	0.071994	0.271802
0.0440649	0.237441	0.0719771	0.271701
0.044059	0.237427	0.0719603	0.271417
0.0440531	0.237414	0.0719435	0.271246
0.0440472	0.237401	0.0719268	0.271141
0.0440413	0.237388	0.0719101	0.271045
0.0440354	0.237376	0.0718935	0.270949
0.0440296	0.237364	0.0718771	0.270858
0.0440237	0.237352	0.0718606	0.270769
0.0440179	0.237341	0.0718443	0.27068
0.0440118	0.236927	0.071828	0.270591
0.0440059	0.236908	0.0718118	0.270503
0.0440001	0.236893	0.0717957	0.270416
0.0439944	0.236883	0.0717796	0.26988
0.0439886	0.236872	0.0717636	0.270136
0.0439829	0.236863	0.0717477	0.270037
0.0439772	0.236853	0.0717319	0.269952
0.0439714	0.236842	0.0717162	0.269854
0.0439657	0.236832	0.0717005	0.269752
0.0439601	0.236821	0.0716849	0.269648
0.0439544	0.237035	0.0716693	0.269542
0.0439488	0.237247	0.0716538	0.269436
0.0439432	0.237311	0.0716384	0.26933
0.0439375	0.237298	0.0716231	0.269225
0.0439319	0.237288	0.0716079	0.26912
0.0439263	0.237277	0.0715927	0.269016
0.0439207	0.237267	0.0715775	0.268912
0.0439151	0.237257	0.0715625	0.268808
0.0439096	0.237246	0.0715475	0.268705
0.0439041	0.237236	0.0715326	0.268603
0.0438986	0.237224	0.0715178	0.2685
0.043893	0.237213	0.071503	0.268399
0.0438875	0.2372	0.0714883	0.268298
0.0438821	0.237187	0.0714736	0.268559
0.0438766	0.237174	0.071459	0.268452
0.0438711	0.23716	0.0714445	0.267483
0.0438656	0.237146	0.0714301	0.266868
0.0438602	0.237132	0.0714157	0.266336
0.0438548	0.237118	0.0714014	0.265724
0.0438494	0.237104	0.0713871	0.265267
0.0438439	0.237087	0.0713729	0.264861
0.0438385	0.237072	0.0713588	0.26453
0.0438331	0.237058	0.0713447	0.264268
0.0438277	0.237045	0.0713307	0.264058
0.0438224	0.237033	0.0713168	0.263897
0.043817	0.23702	0.0713029	0.263754
0.0438116	0.237005	0.0712891	0.263545
0.0438063	0.23699	0.0712753	0.263395
0.0438009	0.236975	0.0712616	0.26291
0.0437955	0.236959	0.071248	0.26275
0.0437902	0.236942	0.0712344	0.262629
0.043785	0.236926	0.0712208	0.262911
0.0437796	0.236909	0.0712073	0.262898
0.0437743	0.236892	0.0711939	0.263294
0.043769	0.236874	0.0711805	0.263044
0.0437636	0.236857	0.0711672	0.263705
0.0437583	0.236841	0.071154	0.26298
0.043753	0.236825	0.0711407	0.262731
0.0437477	0.236809	0.0711276	0.262018
0.0437425	0.236793	0.0711145	0.26186
0.0437371	0.236778	0.0711014	0.261191
0.0437319	0.236764	0.0710884	0.26114
0.0437265	0.236749	0.0710754	0.260669
0.0437213	0.236734	0.0710625	0.260106
0.043716	0.23672	0.0710497	0.260001
0.0437108	0.236883	0.0710369	0.259381
0.0437056	0.236843	0.0710241	0.258861
0.0437003	0.236813	0.0710114	0.258743
0.0436951	0.236889	0.0709988	0.258623
0.0436898	0.23693	0.0709862	0.258405
0.0436846	0.23697	0.0709736	0.257889
0.0436794	0.237034	0.0709612	0.25726
0.0436742	0.23714	0.0709487	0.256756
0.043669	0.237279	0.0709364	0.256635
0.0436638	0.237443	0.0709241	0.256716
0.0436586	0.237564	0.0709118	0.256077
0.0436534	0.238783	0.0708996	0.255577
0.0436482	0.238719	0.0708875	0.254884
0.043643	0.238816	0.0708754	0.254757
0.0436378	0.238705	0.0708635	0.254695
0.0436326	0.23855	0.0708515	0.254693
0.0436275	0.238409	0.0708396	0.254728
0.0436223	0.238375	0.0708278	0.25479
0.0436171	0.238438	0.0708161	0.254874
0.0436119	0.238556	0.0708044	0.25498
0.0436068	0.238568	0.0707928	0.254659
0.0436016	0.238556	0.0707813	0.254802
0.0435964	0.238545	0.0707698	0.254464
0.0435913	0.238533	0.0707583	0.254624
0.0435861	0.238523	0.0707469	0.254416
0.043581	0.238512	0.0707356	0.25434
0.0435758	0.238502	0.0707243	0.254416
0.0435707	0.23849	0.0707131	0.254481
0.0435655	0.238479	0.070702	0.254557
0.0435604	0.238467	0.0706909	0.254159
0.0435553	0.238457	0.0706799	0.254252
0.0435501	0.238447	0.0706689	0.254345
0.043545	0.238438	0.070658	0.25444
0.0435399	0.238429	0.0706471	0.254537
0.0435348	0.238422	0.0706362	0.255295
0.0435296	0.238415	0.0706255	0.256842
0.0435245	0.238409	0.0706147	0.256016
0.0435194	0.238404	0.070604	0.255475
0.0435143	0.2384	0.0705934	0.255525
0.0435092	0.238396	0.0705828	0.255136
0.0435041	0.238393	0.0705722	0.25477
0.043499	0.23839	0.0705617	0.254467
0.0434939	0.238384	0.0705513	0.253849
0.0434889	0.238377	0.0705408	0.2539
0.0434838	0.238375	0.0705304	0.253665
0.0434787	0.238372	0.0705201	0.253433
0.0434737	0.238372	0.0705098	0.253274
0.0434686	0.238373	0.0704995	0.253126
0.0434636	0.238375	0.0704893	0.252467
0.0434586	0.238552	0.0704791	0.251905
0.0434593	0.238736	0.0704689	0.251885
0.0434564	0.238923	0.0701844	0.251951
0.043454	0.239108	0.0699153	0.252082
0.0434504	0.239291	0.0696586	0.252247
0.0434467	0.239468	0.0694107	0.252441
0.0434429	0.239643	0.0691671	0.254317
0.043439	0.239674	0.0689246	0.254374
0.0434348	0.239675	0.0686795	0.254293
0.0434305	0.239672	0.068431	0.253771
0.0434259	0.23967	0.0681198	0.253695
0.0434211	0.239671	0.0678642	0.253648
0.0434161	0.239671	0.0676168	0.253635
0.0434109	0.239669	0.0673769	0.253653
0.0434056	0.239668	0.0673568	0.253714
0.0434002	0.239672	0.0673461	0.253778
0.0433947	0.239674	0.0673364	0.253722
0.0433891	0.239674	0.0673275	0.253855
0.0433835	0.239675	0.0673191	0.253964
0.0433779	0.239674	0.067311	0.254097
0.0433723	0.239678	0.067303	0.25425
0.0433667	0.239679	0.067295	0.254422
0.0433612	0.239679	0.0672869	0.25446
0.0433558	0.239679	0.0672786	0.254525
0.0433504	0.239679	0.0672701	0.254684
0.0433451	0.239683	0.0672614	0.254835
0.0433399	0.239687	0.0672519	0.255006
0.0433347	0.239693	0.0672425	0.2552
0.0433296	0.23986	0.0672329	0.25587
0.0433245	0.239985	0.0672233	0.255811
0.0433195	0.239983	0.0672137	0.255743
0.0433145	0.239987	0.0672041	0.25702
0.0433095	0.23999	0.0671947	0.256844
0.0433045	0.239991	0.0671854	0.256618
0.0432996	0.239993	0.0671763	0.256947
0.0432946	0.239993	0.0671673	0.256353
0.0432897	0.239993	0.0671584	0.257028
0.0432847	0.239999	0.0671496	0.256203
0.0432798	0.240002	0.067141	0.255353
0.0432748	0.240002	0.0671324	0.255045
0.0432699	0.240001	0.0671236	0.254832
0.0432649	0.239999	0.067115	0.254733
0.04326	0.239998	0.0671065	0.254718
0.0432551	0.240001	0.0670978	0.25478
0.0432503	0.240002	0.0670892	0.254904
0.0432454	0.240001	0.0670805	0.255071
0.0432406	0.239999	0.0670719	0.255645
0.0432359	0.239996	0.0670632	0.255818
0.0432312	0.239998	0.0670546	0.255708
0.0432265	0.239997	0.0670459	0.256133
0.0432219	0.239992	0.0670371	0.256199
0.0432174	0.239987	0.0670286	0.25623
0.0432129	0.239985	0.0670196	0.256293
0.0432085	0.23998	0.0670106	0.255886
0.0432041	0.239978	0.0670017	0.255472
0.0431997	0.239976	0.0669929	0.255605
0.0431954	0.240112	0.0669841	0.25666
0.0431912	0.240244	0.0669754	0.256735
0.043187	0.240369	0.0669668	0.256278
0.0431828	0.240494	0.0669583	0.255784
0.0431787	0.24062	0.0669498	0.256736
