# Supplementary material for: A coupled mechano-biochemical model for cell polarity guided anisotropic root growth
Source: eLife. 2021 Nov 1;10:e72132. doi: 10.7554/eLife.72132 (PMC8716106; doi:10.7554/eLife.72132)
Supplement: Figure 4—figure supplement 1—source data 1. [file elife-72132-fig4-figsupp1-data1.xlsx]

## Sheet: Figure 4—figure supplement 1
Time (h)	Growth Rate (µm/h)	Auxin Concentration [IAA]
0	4.71995	0.365274
0.03	4.70066	0.364729
0.06	4.68504	0.364216
0.09	4.67134	0.3638
0.12	4.65932	0.363524
0.15	4.64892	0.363307
0.18	4.64062	0.363174
0.21	4.63386	0.363127
0.24	4.62966	0.363147
0.27	4.62903	0.363219
0.3	4.63143	0.363336
0.33	4.63611	0.363488
0.36	4.6422	0.363666
0.39	4.64916	0.363865
0.42	4.65659	0.364076
0.45	4.66415	0.364283
0.48	4.67192	0.364504
0.51	4.67943	0.364735
0.54	4.68684	0.364957
0.57	4.69451	0.365099
0.6	4.7027	0.365229
0.63	4.7115	0.365404
0.66	4.72137	0.36562
0.69	4.73223	0.365833
0.72	4.75766	0.366228
0.75	4.78691	0.365979
0.78	4.82056	0.365782
0.81	4.85087	0.365691
0.84	4.88059	0.365551
0.87	4.90567	0.365481
0.9	4.92595	0.365437
0.93	4.94177	0.365423
0.96	4.95235	0.365437
0.99	4.95943	0.365667
1.02	4.96383	0.365576
1.05	4.96561	0.365469
1.08	4.96471	0.365416
1.11	4.96152	0.367888
1.14	4.95638	0.367123
1.17	4.94992	0.366267
1.2	4.94292	0.365698
1.23	4.93621	0.365372
1.26	4.93044	0.365135
1.29	4.92593	0.365001
1.32	4.92278	0.366756
1.35	4.92087	0.366521
1.38	4.92004	0.36626
1.41	4.92003	0.366131
1.44	4.92056	0.366631
1.47	4.9216	0.36532
1.5	4.92317	0.364599
1.53	4.92699	0.364424
1.56	4.93341	0.364286
1.59	4.92413	0.36421
1.62	4.9065	0.364127
1.65	4.89132	0.364073
1.68	4.87736	0.364027
1.71	4.86948	0.364006
1.74	4.86241	0.364008
1.77	4.85898	0.364027
1.8	4.85824	0.367477
1.83	4.8595	0.366668
1.86	4.86231	0.365709
1.89	4.86623	0.364973
1.92	4.87017	0.364437
1.95	4.87399	0.363979
1.98	4.87756	0.363583
2.01	4.88037	0.363295
2.04	4.88188	0.363064
2.07	4.88188	0.362868
2.1	4.88026	0.362715
2.13	4.87699	0.362609
2.16	4.87209	0.362548
2.19	4.86561	0.362529
2.22	4.85771	0.362548
2.25	4.84869	0.362607
2.28	4.83877	0.362694
2.31	4.82822	0.362809
2.34	4.81736	0.362944
2.37	4.80626	0.363088
2.4	4.79491	0.363232
2.43	4.78169	0.36337
2.46	4.76591	0.363717
2.49	4.76595	0.363627
2.52	4.77472	0.363489
2.55	4.78178	0.363344
2.58	4.78806	0.36319
2.61	4.79312	0.363045
2.64	4.79775	0.36293
2.67	4.80225	0.363471
2.7	4.80732	0.363046
2.73	4.81326	0.362667
2.76	4.81924	0.362366
2.79	4.82551	0.362117
2.82	4.83314	0.36191
2.85	4.84271	0.361745
2.88	4.85423	0.361866
2.91	4.86724	0.361662
2.94	4.88088	0.36159
2.97	4.90133	0.361012
3	4.91248	0.360427
3.03	4.92249	0.360065
3.06	4.93151	0.359928
3.09	4.93998	0.359528
3.12	4.94009	0.3582
3.15	4.93214	0.357981
3.18	4.92355	0.913178
3.21	4.91573	1.46196
3.24	4.91646	2.00431
3.27	4.92822	2.53455
3.3	4.94587	3.03585
3.33	4.94047	3.48022
3.36	4.88688	3.84999
3.39	4.78048	4.1472
3.42	4.64542	4.38256
3.45	4.48761	4.5639
3.48	4.33025	4.70394
3.51	4.17847	4.81242
3.54	4.03034	4.8968
3.57	3.88664	4.96277
3.6	3.74792	5.01467
3.63	3.6135	5.05559
3.66	3.48232	5.08805
3.69	3.35338	5.11392
3.72	3.22457	5.13474
3.75	3.09442	5.15157
3.78	2.96201	5.16514
3.81	2.82693	5.17604
3.84	2.68936	5.1849
3.87	2.54262	5.19216
3.9	2.40231	5.19814
3.93	2.26003	5.20304
3.96	2.11585	5.20713
3.99	1.96925	5.21064
4.02	1.82844	5.21384
4.05	1.69335	5.21664
4.08	1.55691	5.21905
4.11	1.41811	5.2211
4.14	1.26947	5.22278
4.17	1.10879	0.370232
4.2	0.941455	0.489074
4.23	0.81051	0.488297
4.26	0.74551	0.486637
4.29	0.742313	0.4848
4.32	0.773524	0.482951
4.35	0.830777	0.48123
4.38	0.891109	0.479672
4.41	0.949849	0.478279
4.44	1.00954	0.477017
4.47	1.06898	0.475819
4.5	1.12553	0.474688
4.53	1.17787	0.473619
4.56	1.23127	0.472544
4.59	1.29081	0.471444
4.62	1.35786	0.470265
4.65	1.4314	0.469073
4.68	1.5094	0.467944
4.71	1.59011	0.466878
4.74	1.67241	0.465833
4.77	1.75562	0.464702
4.8	1.83961	0.463322
4.83	1.92434	0.461756
4.86	2.00972	0.460057
4.89	2.09643	0.45829
4.92	2.18481	0.456483
4.95	2.27522	0.454682
4.98	2.36796	0.452888
5.01	2.46336	0.451127
5.04	2.56201	0.449428
5.07	2.66468	0.447804
5.1	2.77224	0.446263
5.13	2.87177	0.444841
5.16	2.95999	0.443547
5.19	3.04524	0.442285
5.22	3.12897	0.989808
5.25	3.21159	1.53189
5.28	3.29229	2.06667
5.31	3.3749	2.58593
5.34	3.45027	3.06553
5.37	3.501	3.48951
5.4	3.51376	3.84181
5.43	3.48798	4.13211
5.46	3.44475	4.36166
5.49	3.37677	4.54183
5.52	3.29546	4.68348
5.55	3.19679	4.79506
5.58	3.08676	4.88384
5.61	2.97584	4.95457
5.64	2.87353	5.01065
5.67	2.78046	5.05474
5.7	2.69471	5.08909
5.73	2.61465	5.11619
5.76	2.53815	5.13783
5.79	2.46337	5.1551
5.82	2.38848	5.16878
5.85	2.31218	5.1796
5.88	2.23318	5.18816
5.91	2.15028	5.19486
5.94	2.06208	5.20013
5.97	1.96751	5.20449
6	1.86534	5.20815
6.03	1.7544	5.21112
6.06	1.63378	5.21364
6.09	1.50429	5.21557
6.12	1.36822	5.21707
6.15	1.22866	5.21834
6.18	1.08705	5.21933
6.21	0.93928	0.478355
6.24	0.793764	0.585708
6.27	0.68856	0.584361
6.3	0.635259	0.582166
6.33	0.629473	0.57981
6.36	0.642881	0.577317
6.39	0.677479	0.574746
6.42	0.722148	0.572267
6.45	0.783455	0.569915
6.48	0.85894	0.567268
6.51	0.940776	0.565197
6.54	1.02099	0.563168
6.57	1.09955	0.561256
6.6	1.17809	0.559482
6.63	1.25725	0.557782
6.66	1.33783	0.556163
6.69	1.41991	0.554671
6.72	1.50362	0.553239
6.75	1.58822	0.551777
6.78	1.67196	0.550236
6.81	1.75109	0.548585
6.84	1.82149	0.546854
6.87	1.88383	0.545071
6.9	1.94433	0.543249
6.93	2.00829	0.541069
6.96	2.02275	0.538982
6.99	2.07086	0.536775
7.02	2.1327	0.534588
7.05	2.22156	0.532439
7.08	2.31464	0.53035
7.11	2.42275	0.528383
7.14	2.54374	0.526694
7.17	2.65604	0.525209
7.2	2.75862	0.523853
7.23	2.85682	0.522532
7.26	2.9514	1.07017
7.29	3.04306	1.61062
7.32	3.13142	2.14105
7.35	3.21463	2.65313
7.38	3.2836	3.12705
7.41	3.33939	3.54094
7.44	3.3715	3.88787
7.47	3.36964	4.16967
7.5	3.33644	4.39298
7.53	3.28146	4.56774
7.56	3.21106	4.70467
7.59	3.13142	4.81215
7.62	3.04256	4.89699
7.65	2.9448	4.9643
7.68	2.84037	5.01787
7.71	2.74605	5.05982
7.74	2.67135	5.0928
7.77	2.61397	5.11881
7.8	2.56616	5.13923
7.83	2.5206	5.15534
7.86	2.52859	5.16798
7.89	2.50525	5.1779
7.92	2.46893	5.18737
7.95	2.40427	5.19299
7.98	2.33045	5.19775
8.01	2.23875	5.20228
8.04	2.13023	5.20649
8.07	2.00649	5.21005
8.1	1.87215	5.21307
8.13	1.7293	5.21553
8.16	1.5808	5.21764
8.19	1.42794	5.2195
8.22	1.27176	5.22106
8.25	1.11496	0.562824
8.28	0.967366	0.66504
8.31	0.844014	0.662376
8.34	0.755075	0.658839
8.37	0.704838	0.655141
8.4	0.688777	0.651451
8.43	0.696579	0.647887
8.46	0.722832	0.644629
8.49	0.762131	0.641688
8.52	0.815729	0.639024
8.55	0.884763	0.636592
8.58	0.9696	0.634391
8.61	1.05747	0.632393
8.64	1.14278	0.630516
8.67	1.22507	0.628421
8.7	1.30203	0.626213
8.73	1.37549	0.62392
8.76	1.44968	0.621677
8.79	1.52618	0.619465
8.82	1.60789	0.617269
8.85	1.70145	0.615083
8.88	1.80839	0.612901
8.91	1.92212	0.610022
8.94	2.03913	0.610168
8.97	2.14626	0.607388
9	2.23963	0.604511
9.03	2.34149	0.603728
9.06	2.44727	0.600792
9.09	2.56306	0.597973
9.12	2.69197	0.59524
9.15	2.82748	0.592688
9.18	2.96639	0.590319
9.21	3.09099	0.588154
9.24	3.20043	0.58622
9.27	3.30079	0.584542
9.3	3.39406	1.13055
9.33	3.48192	1.6684
9.36	3.57184	2.19546
9.39	3.6555	2.70212
9.42	3.72054	3.16932
9.45	3.75255	3.57662
9.48	3.75426	3.91676
9.51	3.73391	4.19063
9.54	3.69678	4.41058
9.57	3.64335	4.58269
9.6	3.58121	4.7163
9.63	3.50814	4.8214
9.66	3.42255	4.90449
9.69	3.32501	4.97031
9.72	3.21977	5.02258
9.75	3.11165	5.06381
9.78	3.00222	5.09612
9.81	2.89399	5.12156
9.84	2.78917	5.14172
9.87	2.6994	5.15771
9.9	2.62746	5.17038
9.93	2.54984	5.18056
9.96	2.47	5.18891
9.99	2.38077	5.19577
10.02	2.27782	5.20144
10.05	2.16599	5.2061
10.08	2.04686	5.21002
10.11	1.9217	5.21336
10.14	1.79178	5.21621
10.17	1.65741	5.21856
10.2	1.51944	5.22045
10.23	1.37846	5.22191
10.26	1.22784	5.2231
10.29	1.07731	0.629954
10.32	0.939871	0.724238
10.35	0.847118	0.721067
10.38	0.79085	0.717297
10.41	0.761099	0.713502
10.44	0.751069	0.70969
10.47	0.761347	0.70589
10.5	0.788038	0.702294
10.53	0.832945	0.698939
10.56	0.89463	0.694754
10.59	0.971845	0.691613
10.62	1.05825	0.688495
10.65	1.14276	0.685337
10.68	1.22422	0.682113
10.71	1.30292	0.678696
10.74	1.37892	0.675205
10.77	1.45193	0.671742
10.8	1.52468	0.668326
10.83	1.59884	0.664961
10.86	1.67768	0.661659
10.89	1.76572	0.658484
10.92	1.86175	0.655366
10.95	1.96281	0.652279
10.98	2.06723	0.64928
11.01	2.17547	0.646383
11.04	2.28751	0.643572
11.07	2.40376	0.640876
11.1	2.52392	0.638341
11.13	2.64844	0.636238
11.16	2.77708	0.633781
11.19	2.90924	0.630876
11.22	3.04413	0.627707
11.25	3.16451	0.624886
11.28	3.27537	0.622078
11.31	3.37833	0.619426
11.34	3.47525	1.16672
11.37	3.56703	1.70263
11.4	3.66695	2.22768
11.43	3.76387	2.72833
11.46	3.84662	3.18972
11.49	3.9045	3.59499
11.52	3.92475	3.93543
11.55	3.91126	4.21187
11.58	3.86167	4.43077
11.61	3.7896	4.60266
11.64	3.69724	4.73774
11.67	3.59161	4.84419
11.7	3.49287	4.92851
11.73	3.40097	4.99494
11.76	3.31186	5.04612
11.79	3.22036	5.08532
11.82	3.12627	5.11562
11.85	3.03239	5.13897
11.88	2.93983	5.15713
11.91	2.84786	5.17131
11.94	2.75508	5.18253
11.97	2.66059	5.19157
12	2.56358	5.19881
12.03	2.4627	5.20469
12.06	2.35685	5.20962
12.09	2.24514	5.21381
12.12	2.12695	5.21736
12.15	2.00211	5.22047
12.18	1.87086	5.22303
12.21	1.73366	5.22512
12.24	1.59103	5.22681
12.27	1.44369	5.22811
12.3	1.27956	5.22919
12.33	1.11165	0.676761
12.36	0.952335	0.768295
12.39	0.834265	0.764845
12.42	0.760647	0.76085
12.45	0.724806	0.756841
12.48	0.727674	0.752784
12.51	0.755864	0.748778
12.54	0.809483	0.744973
12.57	0.882983	0.74146
12.6	0.954949	0.738246
12.63	1.02471	0.73523
12.66	1.09404	0.731741
12.69	1.16405	0.728845
12.72	1.23625	0.725815
12.75	1.31029	0.72278
12.78	1.38512	0.719873
12.81	1.45879	0.71708
12.84	1.5332	0.714331
12.87	1.61057	0.711601
12.9	1.6938	0.708922
12.93	1.78733	0.706144
12.96	1.88998	0.703241
12.99	1.9973	0.700312
13.02	2.10614	0.69736
13.05	2.2155	0.694374
13.08	2.32598	0.6913
13.11	2.43858	0.6881
13.14	2.55391	0.684981
13.17	2.67167	0.681885
13.2	2.79175	0.677907
13.23	2.91307	0.674606
13.26	3.03478	0.669667
13.29	3.13539	0.666453
13.32	3.22473	0.662555
13.35	3.30598	0.659004
13.38	3.38116	1.20171
13.41	3.45126	1.7338
13.44	3.54108	2.25332
13.47	3.63416	2.75035
13.5	3.71979	3.20373
13.53	3.7839	3.60555
13.56	3.81002	3.9419
13.59	3.80081	4.21412
13.62	3.75057	4.4289
13.65	3.67571	4.59716
13.68	3.58175	4.72975
13.71	3.47919	4.83449
13.74	3.37516	4.91765
13.77	3.27353	4.98424
13.8	3.17254	5.03722
13.83	3.06796	5.07907
13.86	2.96158	5.11165
13.89	2.85782	5.1372
13.92	2.75957	5.1571
13.95	2.66676	5.17291
13.98	2.57747	5.18567
14.01	2.48929	5.19594
14.04	2.40023	5.20404
14.07	2.30931	5.21058
14.1	2.21501	5.21608
14.13	2.11663	5.22063
14.16	2.01384	5.22436
14.19	1.90643	5.22746
14.22	1.79419	5.22995
14.25	1.67726	5.2319
14.28	1.55593	5.2334
14.31	1.43037	5.23459
14.34	1.2767	5.23554
14.37	1.11227	0.707049
14.4	0.948983	0.797686
14.43	0.82406	0.794818
14.46	0.744348	0.791302
14.49	0.703558	0.787642
14.52	0.705651	0.783934
14.55	0.734154	0.780254
14.58	0.785669	0.776625
14.61	0.852161	0.773047
14.64	0.926195	0.769492
14.67	1.00201	0.765927
14.7	1.07911	0.762236
14.73	1.15741	0.758328
14.76	1.23629	0.754245
14.79	1.31502	0.750286
14.82	1.39229	0.746498
14.85	1.46639	0.742873
14.88	1.53799	0.739356
14.91	1.61024	0.735908
14.94	1.68603	0.732487
14.97	1.76995	0.729086
15	1.86506	0.725716
15.03	1.96769	0.720551
15.06	2.07427	0.717543
15.09	2.18261	0.714686
15.12	2.29119	0.711993
15.15	2.41362	0.709331
15.18	2.5393	0.707227
15.21	2.67024	0.704367
15.24	2.80056	0.701478
15.27	2.93118	0.701008
15.3	3.06238	0.698046
15.33	3.1715	0.694802
15.36	3.27727	0.691628
15.39	3.37851	0.688529
15.42	3.47568	1.23356
15.45	3.56902	1.76748
15.48	3.68574	2.28695
15.51	3.78301	2.78431
15.54	3.85525	3.2431
15.57	3.89437	3.64639
15.6	3.88717	3.98442
15.63	3.84885	4.25737
15.66	3.78751	4.47054
15.69	3.70818	4.6381
15.72	3.60983	4.76756
15.75	3.50866	4.86858
15.78	3.41571	4.94806
15.81	3.32782	5.01004
15.84	3.24246	5.05786
15.87	3.15502	5.09487
15.9	3.06297	5.12377
15.93	2.96976	5.14658
15.96	2.87829	5.16475
15.99	2.78975	5.17915
16.02	2.7047	5.19072
16.05	2.60842	5.20009
16.08	2.51038	5.20758
16.11	2.40776	5.2136
16.14	2.30506	5.2186
16.17	2.20021	5.22276
16.2	2.09153	5.22632
16.23	1.9786	5.22935
16.26	1.85235	5.2319
16.29	1.71801	5.23392
16.32	1.57765	5.23548
16.35	1.43245	5.23676
16.38	1.2556	5.23781
16.41	1.09067	0.739512
16.44	0.944013	0.827349
16.47	0.855885	0.824079
16.5	0.821445	0.82044
16.53	0.820823	0.817035
16.56	0.842082	0.813854
16.59	0.880067	0.810723
16.62	0.939257	0.807422
16.65	1.007	0.804217
16.68	1.07362	0.801071
16.71	1.14038	0.797903
16.74	1.20809	0.794657
16.77	1.27705	0.791137
16.8	1.34664	0.787331
16.83	1.41597	0.783333
16.86	1.48342	0.779243
16.89	1.54729	0.775073
16.92	1.6092	0.770775
16.95	1.67338	0.766359
16.98	1.74362	0.761837
17.01	1.82532	0.757263
17.04	1.92113	0.752689
17.07	2.02816	0.748084
17.1	2.14257	0.743344
17.13	2.26156	0.738854
17.16	2.38362	0.734697
17.19	2.50816	0.730775
17.22	2.63515	0.727051
17.25	2.76476	0.723354
17.28	2.89599	0.719835
17.31	3.02895	0.716576
17.34	3.16355	0.713363
17.37	3.26859	0.710023
17.4	3.36275	0.706655
17.43	3.45127	0.703308
17.46	3.53855	1.24277
17.49	3.62559	1.77308
17.52	3.7267	2.29036
17.55	3.81366	2.78485
17.58	3.88438	3.24004
17.61	3.92493	3.63976
17.64	3.92517	3.97467
17.67	3.90202	4.24523
17.7	3.85815	4.45896
17.73	3.79018	4.626
17.76	3.69596	4.75617
17.79	3.60069	4.85754
17.82	3.52223	4.93633
17.85	3.45123	4.99767
17.88	3.38089	5.04531
17.91	3.30428	5.08253
17.94	3.2184	5.11192
17.97	3.12569	5.13508
18	3.02967	5.15331
18.03	2.93258	5.16796
18.06	2.83527	5.17982
18.09	2.73746	5.18937
18.12	2.63819	5.19707
18.15	2.53624	5.20341
18.18	2.43152	5.20869
18.21	2.32284	5.21314
18.24	2.2092	5.21695
18.27	2.08964	5.22016
18.3	1.96375	5.22286
18.33	1.83143	5.2251
18.36	1.69299	5.22699
18.39	1.54907	5.22859
18.42	1.38451	5.22985
18.45	1.22776	0.757921
18.48	1.08118	0.840859
18.51	0.988869	0.83769
18.54	0.94468	0.834153
18.57	0.926559	0.830754
18.6	0.928989	0.827527
18.63	0.955785	0.824326
18.66	1.01332	0.821011
18.69	1.0797	0.817763
18.72	1.13712	0.814513
18.75	1.19165	0.811197
18.78	1.24706	0.807751
18.81	1.30522	0.803962
18.84	1.36653	0.800006
18.87	1.43078	0.796115
18.9	1.49653	0.792349
18.93	1.56111	0.788669
18.96	1.62337	0.785003
18.99	1.68593	0.781334
19.02	1.75242	0.777684
19.05	1.82834	0.774043
19.08	1.9183	0.770401
19.11	2.02081	0.766759
19.14	2.13228	0.763103
19.17	2.24983	0.75956
19.2	2.37185	0.755876
19.23	2.4962	0.752084
19.26	2.62268	0.74825
19.29	2.7513	0.744416
19.32	2.88215	0.74058
19.35	3.01502	0.737073
19.38	3.14955	0.733705
19.41	3.25605	0.730249
19.44	3.35065	0.726635
19.47	3.43938	0.722968
19.5	3.52585	1.25338
19.53	3.61118	1.77343
19.56	3.7115	2.27968
19.59	3.8023	2.76323
19.62	3.87551	3.2144
19.65	3.91989	3.60548
19.68	3.92103	3.94008
19.71	3.8996	4.21326
19.74	3.85504	4.4312
19.77	3.78365	4.60245
19.8	3.68264	4.73614
19.83	3.5862	4.8401
19.86	3.50794	4.9211
19.89	3.43957	4.98489
19.92	3.37398	5.0351
19.95	3.304	5.07465
19.98	3.22425	5.1057
20.01	3.13583	5.13048
20.04	3.04199	5.15044
20.07	2.94537	5.16628
20.1	2.84715	5.17889
20.13	2.74892	5.18897
20.16	2.6497	5.19707
20.19	2.5489	5.20366
20.22	2.4452	5.20905
20.25	2.33757	5.21347
20.28	2.225	5.21724
20.31	2.10687	5.22038
20.34	1.98335	5.22295
20.37	1.8542	5.22505
20.4	1.71982	5.22678
20.43	1.58079	5.22823
20.46	1.42004	5.22934
20.49	1.26245	0.769321
20.52	1.11634	0.851355
20.55	1.01927	0.848003
20.58	0.972618	0.844275
20.61	0.951023	0.840786
20.64	0.952067	0.83751
20.67	0.979642	0.834267
20.7	1.03938	0.830893
20.73	1.10107	0.827571
20.76	1.15365	0.824265
20.79	1.20368	0.820953
20.82	1.25541	0.817596
20.85	1.31082	0.814147
20.88	1.37071	0.810606
20.91	1.43496	0.806982
20.94	1.50253	0.803252
20.97	1.57108	0.799521
21	1.63929	0.795892
21.03	1.70951	0.792419
21.06	1.78483	0.789022
21.09	1.86997	0.785786
21.12	1.96933	0.782623
21.15	2.08147	0.779398
21.18	2.20241	0.776136
21.21	2.32907	0.772774
21.24	2.45915	0.769426
21.27	2.59204	0.766052
21.3	2.72729	0.762591
21.33	2.86473	0.759076
21.36	3.00392	0.754147
21.39	3.14427	0.750512
21.42	3.28292	0.746559
21.45	3.38322	0.742352
21.48	3.46552	0.737933
21.51	3.53736	0.733386
21.54	3.6055	1.25951
21.57	3.67156	1.773
21.6	3.74398	2.2712
21.63	3.81661	2.74633
21.66	3.87674	3.18538
21.69	3.91283	3.57822
21.72	3.89659	3.91438
21.75	3.85305	4.19056
21.78	3.79223	4.41118
21.81	3.71462	4.5841
21.84	3.61704	4.71928
21.87	3.51336	4.82527
21.9	3.42346	4.9084
21.93	3.34126	4.97406
21.96	3.26082	5.026
21.99	3.17519	5.06723
22.02	3.07953	5.0998
22.05	2.97484	5.12543
22.08	2.86504	5.14544
22.11	2.75286	5.16105
22.14	2.64021	5.17341
22.17	2.52704	5.1833
22.2	2.413	5.19136
22.23	2.2972	5.19792
22.26	2.17886	5.20334
22.29	2.0573	5.20781
22.32	1.93431	5.21152
22.35	1.82016	5.21444
22.38	1.7076	5.21684
22.41	1.59426	5.21893
22.44	1.47717	5.2207
22.47	1.35609	5.22216
22.5	1.22251	5.22308
22.53	1.08287	0.773737
22.56	0.949975	0.853187
22.59	0.85748	0.84979
22.62	0.823958	0.846152
22.65	0.820722	0.842918
22.68	0.834743	0.839986
22.71	0.865028	0.837094
22.74	0.917075	0.834075
22.77	0.980063	0.831079
22.8	1.03662	0.828114
22.83	1.09105	0.825087
22.86	1.1472	0.821944
22.89	1.20708	0.818548
22.92	1.27121	0.815022
22.95	1.33951	0.811473
22.98	1.41083	0.807952
23.01	1.48323	0.804486
23.04	1.55505	0.801037
23.07	1.62802	0.797562
23.1	1.70575	0.794102
23.13	1.79046	0.790333
23.16	1.8865	0.78628
23.19	1.99651	0.782146
23.22	2.1174	0.778081
23.25	2.24561	0.774172
23.28	2.3787	0.770342
23.31	2.51549	0.766424
23.34	2.65548	0.762634
23.37	2.79835	0.758906
23.4	2.94323	0.760132
23.43	3.08952	0.756133
23.46	3.23678	0.752116
23.49	3.36283	0.748395
23.52	3.4774	0.744966
23.55	3.58439	0.741173
23.58	3.68714	1.26615
23.61	3.78665	1.77936
23.64	3.88577	2.27628
23.67	3.98334	2.75247
23.7	4.06235	3.19212
23.73	4.10399	3.58306
23.76	4.07775	3.91607
23.79	4.02393	4.18911
23.82	3.9552	4.4079
23.85	3.87285	4.58054
23.88	3.77275	4.71556
23.91	3.66769	4.82164
23.94	3.57715	4.90537
23.97	3.4962	4.97165
24	3.41877	5.02448
24.03	3.34129	5.06662
24.06	3.25838	5.10015
24.09	3.16627	5.12665
24.12	3.0669	5.14756
24.15	2.96288	5.16402
24.18	2.85587	5.17682
24.21	2.74634	5.18685
24.24	2.63397	5.1951
24.27	2.51818	5.20183
24.3	2.39876	5.2074
24.33	2.27497	5.212
24.36	2.1463	5.21573
24.39	2.01258	5.21881
24.42	1.87391	5.22135
24.45	1.73064	5.22349
24.48	1.58337	5.22524
24.51	1.43293	5.22675
24.54	1.27661	5.22792
24.57	1.11621	0.782091
24.6	0.96862	0.862123
24.63	0.877165	0.858143
24.66	0.860407	0.853953
24.69	0.87498	0.850416
24.72	0.905182	0.847414
24.75	0.949153	0.844687
24.78	1.01287	0.842093
24.81	1.08618	0.839487
24.84	1.15222	0.836916
24.87	1.21458	0.834381
24.9	1.27614	0.831751
24.93	1.33845	0.829017
24.96	1.40268	0.82627
24.99	1.4698	0.823496
25.02	1.54031	0.820668
25.05	1.61417	0.818006
25.08	1.68997	0.815624
25.11	1.76734	0.813287
25.14	1.84676	0.810727
25.17	1.9304	0.807954
25.2	2.02257	0.804951
25.23	2.12721	0.801728
25.26	2.24458	0.798213
25.29	2.37084	0.794522
25.32	2.50325	0.790699
25.35	2.63997	0.786818
25.38	2.77997	0.782857
25.41	2.92256	0.778921
25.44	3.06694	0.774983
25.47	3.21227	0.771054
25.5	3.358	0.76716
25.53	3.47956	0.76337
25.56	3.58872	0.759759
25.59	3.68881	0.756281
25.62	3.78311	1.27921
25.65	3.87272	1.79409
25.68	3.9583	2.29544
25.71	4.03142	2.77356
25.74	4.08469	3.21342
25.77	4.11397	3.60058
25.8	4.08367	3.92744
25.83	4.02313	4.19566
25.86	3.94952	4.4112
25.89	3.86374	4.58138
25.92	3.76077	4.71444
25.95	3.64228	4.81804
25.98	3.53609	4.89905
26.01	3.44036	4.9631
26.04	3.35325	5.01426
26.07	3.27102	5.05525
26.1	3.18836	5.08827
26.13	3.10015	5.11484
26.16	3.00476	5.1362
26.19	2.90446	5.15329
26.22	2.80068	5.16664
26.25	2.69401	5.17744
26.28	2.58442	5.18632
26.31	2.47158	5.19363
26.34	2.35495	5.19972
26.37	2.23396	5.20479
26.4	2.10819	5.20896
26.43	1.97739	5.21249
26.46	1.84157	5.21546
26.49	1.70025	5.21787
26.52	1.55446	5.2199
26.55	1.40542	5.22153
26.58	1.2529	5.22271
26.61	1.1066	0.785839
26.64	0.974855	0.863438
26.67	0.891367	0.860024
26.7	0.875461	0.856566
26.73	0.892069	0.853528
26.76	0.920615	0.850843
26.79	0.959881	0.848302
26.82	1.01673	0.845772
26.85	1.09147	0.843125
26.88	1.15916	0.840321
26.91	1.2228	0.837366
26.94	1.28437	0.83425
26.97	1.34561	0.831062
27	1.40756	0.827942
27.03	1.47143	0.824895
27.06	1.53817	0.821859
27.09	1.60849	0.818841
27.12	1.68241	0.815844
27.15	1.75886	0.812803
27.18	1.83738	0.809596
27.21	1.9196	0.806263
27.24	2.00871	0.802879
27.27	2.10882	0.799474
27.3	2.22272	0.796032
27.33	2.34887	0.792508
27.36	2.48392	0.788983
27.39	2.62601	0.78552
27.42	2.77309	0.782093
27.45	2.92375	0.778247
27.48	3.07716	0.77287
27.51	3.23221	0.769405
27.54	3.3861	0.767577
27.57	3.51143	0.764074
27.6	3.62385	0.760447
27.63	3.72935	0.756867
27.66	3.83106	1.27503
27.69	3.93034	1.78099
27.72	4.02811	2.27259
27.75	4.12203	2.74237
27.78	4.18831	3.17958
27.81	4.21832	3.57346
27.84	4.19748	3.90895
27.87	4.14776	4.18595
27.9	4.07838	4.4057
27.93	3.98572	4.58283
27.96	3.87551	4.71523
27.99	3.77603	4.82444
28.02	3.68681	4.91005
28.05	3.60539	4.97678
28.08	3.5301	5.02859
28.11	3.45727	5.06922
28.14	3.3827	5.10154
28.17	3.30132	5.12768
28.2	3.20976	5.14886
28.23	3.10901	5.16576
28.26	3.00232	5.17916
28.29	2.89133	5.18965
28.32	2.77688	5.19792
28.35	2.65881	5.20465
28.38	2.53683	5.21021
28.41	2.41015	5.21475
28.44	2.27995	5.21855
28.47	2.14386	5.22173
28.5	2.00263	5.2245
28.53	1.85646	5.22686
28.56	1.70649	5.22875
28.59	1.55283	5.23019
28.62	1.39458	5.23126
28.65	1.23454	0.795647
28.68	1.097	0.873936
28.71	1.01326	0.868496
28.74	0.985944	0.862991
28.77	0.988656	0.858138
28.8	1.0101	0.853988
28.83	1.05381	0.850351
28.86	1.11564	0.847
28.89	1.16871	0.84374
28.92	1.21525	0.840564
28.95	1.25946	0.837614
28.98	1.30406	0.834861
29.01	1.35126	0.832209
29.04	1.4024	0.829758
29.07	1.45851	0.827363
29.1	1.52009	0.824906
29.13	1.58745	0.822366
29.16	1.66034	0.819735
29.19	1.73894	0.816965
29.22	1.82293	0.814026
29.25	1.91187	0.810876
29.28	2.00525	0.80595
