# Supplementary material for: A coupled mechano-biochemical model for cell polarity guided anisotropic root growth
Source: eLife. 2021 Nov 1;10:e72132. doi: 10.7554/eLife.72132 (PMC8716106; doi:10.7554/eLife.72132)
Supplement: Figure 4—source data 1. [file elife-72132-fig4-data1.xlsx]

## Sheet: Figure 4C
Time (h)	Growth Rate (µm/h)	Auxin Concentration [IAA]
0	4.94514	0.511956
0.03	5.10393	0.512172
0.06	4.92412	0.511693
0.09	4.92412	0.510748
0.12	4.91812	0.508842
0.15	5.08639	0.50874
0.18	4.91347	0.50832
0.21	4.91497	0.507185
0.24	5.09268	0.50613
0.27	5.09587	0.505987
0.3	4.75372	0.50549
0.33	4.92832	0.504423
0.36	5.11383	0.504313
0.39	4.95145	0.503926
0.42	4.96188	0.503505
0.45	4.9719	0.503126
0.48	4.81399	0.502765
0.51	4.98894	0.502411
0.54	5.01576	0.502091
0.57	4.88417	0.501794
0.6	5.05931	0.501528
0.63	5.07485	0.501289
0.66	5.08929	0.501069
0.69	5.10199	0.500873
0.72	5.11568	0.500693
0.75	5.1301	0.500522
0.78	5.14506	0.500355
0.81	5.15954	0.500191
0.84	5.17327	0.500026
0.87	5.1858	0.500176
0.9	5.37179	0.500163
0.93	5.04256	0.49974
0.96	5.05196	0.499359
0.99	5.22738	0.663826
1.02	5.4114	0.826152
1.05	5.24959	0.985298
1.08	5.42586	1.14341
1.11	5.43547	1.30062
1.14	5.08578	1.45486
1.17	5.09725	1.60756
1.2	5.29355	1.75862
1.23	5.31815	1.90763
1.26	5.15818	2.0544
1.29	5.32907	2.19856
1.32	5.315	2.33847
1.35	5.40613	2.47502
1.38	5.23157	2.60663
1.41	5.16467	2.72861
1.44	5.17239	2.84728
1.47	5.07207	2.96048
1.5	4.9598	3.06444
1.53	4.83714	3.16672
1.56	4.70699	3.25675
1.59	4.57232	3.34822
1.62	4.43312	3.4334
1.65	4.28734	3.50552
1.68	4.13232	3.57955
1.71	3.96687	3.64318
1.74	3.7923	3.70303
1.77	3.62887	3.75926
1.8	3.30501	3.8034
1.83	3.40707	3.84845
1.86	3.23208	3.89175
1.89	3.13409	3.93832
1.92	2.98689	3.96915
1.95	2.93167	4.00102
1.98	2.7554	4.0333
2.01	2.70949	4.05861
2.04	3.01559	4.08707
2.07	2.82936	4.11704
2.1	2.79716	4.14502
2.13	2.76688	4.17026
2.16	2.75008	4.19349
2.19	2.75267	4.21528
2.22	2.76693	4.23645
2.25	2.67666	4.25717
2.28	2.85219	4.2765
2.31	2.91992	4.29387
2.34	2.91332	4.30953
2.37	3.01484	4.32411
2.4	3.12854	4.33813
2.43	3.25297	4.352
2.46	3.38481	4.36526
2.49	3.52163	4.37728
2.52	3.66316	4.38908
2.55	3.8116	4.40056
2.58	3.96937	4.41112
2.61	4.13768	4.41987
2.64	4.31508	4.42736
2.67	4.48126	4.43405
2.7	4.63297	4.44048
2.73	4.70805	4.44595
2.76	4.88507	4.45035
2.79	4.98437	4.45436
2.82	4.95682	4.45809
2.85	5.0088	4.46189
2.88	5.18524	4.46533
2.91	5.22392	4.4685
2.94	5.09406	4.47131
2.97	5.27018	4.47373
3	5.28204	4.47576
3.03	5.28916	4.47698
3.06	5.29311	4.47772
3.09	5.29523	4.47843
3.12	5.29625	4.47876
3.15	5.29656	4.47999
3.18	5.29626	4.48153
3.21	5.29569	4.48291
3.24	5.29458	4.48406
3.27	5.29316	4.48505
3.3	5.29144	4.48606
3.33	5.28923	4.48687
3.36	5.28702	4.48705
3.39	5.28423	4.48713
3.42	5.28113	4.48794
3.45	5.27752	4.48978
3.48	5.27348	4.49257
3.51	5.26878	4.49581
3.54	5.26336	4.49841
3.57	5.25703	4.50028
3.6	5.24969	4.50165
3.63	5.24103	4.50263
3.66	5.23089	4.50348
3.69	5.21922	4.50433
3.72	5.20547	4.5052
3.75	5.18966	4.50643
3.78	5.17144	4.50748
3.81	5.1507	4.50787
3.84	5.12722	4.50788
3.87	5.10079	4.50742
3.9	5.07116	4.50688
3.93	5.03784	4.50619
3.96	5.00083	4.50534
3.99	4.96001	4.50436
4.02	4.91512	4.50416
4.05	4.8659	4.50409
4.08	4.81254	4.50371
4.11	4.75481	4.50309
4.14	4.69277	4.50229
4.17	4.62644	4.50156
4.2	4.55595	4.50146
4.23	4.48136	4.5012
4.26	4.40273	4.50113
4.29	4.32017	4.50149
4.32	4.23377	4.50271
4.35	4.14369	4.50444
4.38	4.05015	4.50555
4.41	3.95347	4.50569
4.44	3.85394	4.50514
4.47	3.7519	4.50487
4.5	3.64764	4.50462
4.53	3.54157	4.50446
4.56	3.43402	4.50387
4.59	3.32537	4.50293
4.62	3.21603	4.50202
4.65	3.10618	4.50177
4.68	2.99619	4.50244
4.71	2.88632	4.50271
4.74	2.77683	4.50268
4.77	2.66806	4.50208
4.8	2.56038	4.50138
4.83	2.4541	4.5009
4.86	2.34955	4.50022
4.89	2.24696	4.4995
4.92	2.14652	4.49912
4.95	2.04837	4.49908
4.98	1.95261	4.49926
5.01	1.85929	4.49965
5.04	1.76853	4.50057
5.07	1.68034	4.50133
5.1	1.59474	4.50207
5.13	1.51173	4.50199
5.16	1.43138	4.50112
5.19	1.35378	4.49997
5.22	1.27902	4.49917
5.25	1.20721	4.49795
5.28	1.13844	4.49726
5.31	1.07286	4.49743
5.34	1.01062	4.49765
5.37	0.951824	4.49752
5.4	0.896619	4.49727
5.43	0.845076	4.49688
5.46	0.797208	4.49628
5.49	0.752973	4.49523
5.52	0.71231	4.49405
5.55	0.67518	4.49292
5.58	0.641456	4.49272
5.61	0.611037	4.49332
5.64	0.583845	4.49405
5.67	0.559797	4.49502
5.7	0.538835	4.49539
5.73	0.52091	4.49494
5.76	0.505978	4.49443
5.79	0.494028	4.49389
5.82	0.485058	4.49287
5.85	0.479026	4.49146
5.88	0.475855	4.49058
5.91	0.475437	4.48988
5.94	0.477617	4.4898
5.97	0.48226	4.49046
6	0.489249	4.49113
6.03	0.498463	4.49148
6.06	0.509776	4.49091
6.09	0.523024	4.49044
6.12	0.538044	4.49007
6.15	0.554576	4.48931
6.18	0.572321	4.48955
6.21	0.59093	4.49024
6.24	0.610026	4.49115
6.27	0.629255	4.4919
6.3	0.64826	4.49265
6.33	0.66674	4.49354
6.36	0.684517	4.4946
6.39	0.701434	4.4952
6.42	0.717415	4.49529
6.45	0.73243	4.49565
6.48	0.746442	4.49544
6.51	0.759422	4.49463
6.54	0.771334	4.4939
6.57	0.7821	4.49334
6.6	0.79166	4.49319
6.63	0.799986	4.49369
6.66	0.807027	4.49465
6.69	0.812697	4.49573
6.72	0.816889	4.49693
6.75	0.819606	4.49741
6.78	0.820911	4.4979
6.81	0.820897	4.49832
6.84	0.819681	4.49818
6.87	0.81732	4.49799
6.9	0.813842	4.49814
6.93	0.809218	4.49805
6.96	0.803441	4.49843
6.99	0.796525	4.49952
7.02	0.788501	4.40681
7.05	0.779458	4.32367
7.08	0.769465	4.24857
7.11	0.758552	4.18024
7.14	0.746802	4.11622
7.17	0.734378	4.05552
7.2	0.721463	3.99732
7.23	0.708229	3.94153
7.26	0.694804	3.88809
7.29	0.681376	3.83691
7.32	0.668025	3.78756
7.35	0.65485	3.73962
7.38	0.64205	3.69285
7.41	0.629887	3.64745
7.44	0.618676	3.60312
7.47	0.608528	3.55955
7.5	0.599582	3.51697
7.53	0.591758	3.47496
7.56	0.58519	3.4339
7.59	0.580049	3.39399
7.62	0.576718	3.35529
7.65	0.575487	3.31795
7.68	0.576984	3.2819
7.71	0.581495	3.2467
7.74	0.589172	3.21215
7.77	0.600271	3.1783
7.8	0.614901	3.14573
7.83	0.633149	3.11449
7.86	0.654984	3.08443
7.89	0.680293	3.05526
7.92	0.708989	3.02702
7.95	0.740162	2.99933
7.98	0.774669	2.97208
8.01	0.81232	2.94537
8.04	0.853296	2.91933
8.07	0.897267	2.89392
8.1	0.943627	2.86927
8.13	0.991898	2.84539
8.16	1.04183	2.82204
8.19	1.09323	2.79891
8.22	1.14613	2.77601
8.25	1.20015	2.75347
8.28	1.25532	2.73172
8.31	1.31139	2.71076
8.34	1.36816	2.69033
8.37	1.42554	2.6701
8.4	1.48331	2.64986
8.43	1.54177	2.63008
8.46	1.60014	2.6109
8.49	1.65814	2.59246
8.52	1.71499	2.57458
8.55	1.77055	2.55679
8.58	1.8244	2.53895
8.61	1.87624	2.52152
8.64	1.92611	2.50491
8.67	1.97386	2.48878
8.7	2.01972	2.47289
8.73	2.06373	2.45747
8.76	2.10608	2.44225
8.79	2.14702	2.42703
8.82	2.18667	2.41217
8.85	2.22595	2.39758
8.88	2.26404	2.38324
8.91	2.30118	2.36963
8.94	2.33724	2.35672
8.97	2.37248	2.34393
9	2.40743	2.33105
9.03	2.44243	2.31792
9.06	2.47763	2.30446
9.09	2.51308	2.29105
9.12	2.54861	2.2779
9.15	2.58449	2.26492
9.18	2.62042	2.25249
9.21	2.65621	2.24039
9.24	2.69172	2.22828
9.27	2.72707	2.21616
9.3	2.76262	2.20404
9.33	2.79831	2.19208
9.36	2.8348	2.18038
9.39	2.87208	2.16896
9.42	2.91052	2.15784
9.45	2.94996	2.147
9.48	2.99026	2.13625
9.51	3.03155	2.12533
9.54	3.07359	2.11431
9.57	3.11625	2.10329
9.6	3.15913	2.09276
9.63	3.20212	2.08278
9.66	3.24496	2.07293
9.69	3.28738	2.06293
9.72	3.3292	2.05274
9.75	3.3703	2.04239
9.78	3.41136	2.03252
9.81	3.45135	2.02309
9.84	3.49013	2.01362
9.87	3.52761	2.00387
9.9	3.56379	1.9937
9.93	3.59881	1.98388
9.96	3.63266	1.97441
9.99	3.66536	1.965
10.02	3.69691	1.95563
10.05	3.72727	1.94608
10.08	3.75653	1.93644
10.11	3.78484	1.92685
10.14	3.81226	1.91735
10.17	3.83869	1.90812
10.2	3.86389	1.89893
10.23	3.88772	1.88976
10.26	3.91019	1.88028
10.29	3.93148	1.87077
10.32	3.95174	1.86151
10.35	3.97096	1.85223
10.38	3.98905	1.84329
10.41	4.00589	1.83324
10.44	4.16007	1.82463
10.47	4.0358	1.8149
10.5	4.049	1.80582
10.53	4.06106	1.79708
10.56	4.07214	1.78856
10.59	4.08235	1.78017
10.62	4.09185	1.77195
10.65	4.1008	1.76385
10.68	4.10848	1.75595
10.71	4.1159	1.74819
10.74	4.12309	1.74056
10.77	4.1301	1.73297
10.8	4.13688	1.7256
10.83	4.14327	1.7159
10.86	4.29011	1.70901
10.89	4.15489	1.70126
10.92	4.16057	1.69422
10.95	4.1645	1.68713
10.98	4.17	1.68033
11.01	4.17571	1.67363
11.04	4.18158	1.66722
11.07	4.18817	1.66008
11.1	4.3394	1.65545
11.13	4.2024	1.65061
11.16	4.21011	1.64638
11.19	4.21829	1.64214
11.22	4.22655	1.63779
11.25	4.23486	1.63329
11.28	4.24316	1.6286
11.31	4.25135	1.62382
11.34	4.12075	1.61893
11.37	4.26723	1.61397
11.4	4.27494	1.60908
11.43	4.28254	1.60419
11.46	4.29001	1.59943
11.49	4.2974	1.59478
11.52	4.30468	1.59009
11.55	4.31182	1.58552
11.58	4.31881	1.58096
11.61	4.32563	1.57669
11.64	4.47962	1.57275
11.67	4.33893	1.56756
11.7	4.34546	1.56268
11.73	4.35199	1.55796
11.76	4.21767	1.55338
11.79	4.36487	1.54869
11.82	4.37074	1.54132
11.85	4.52492	1.53657
11.88	4.53011	1.53094
11.91	4.38812	1.52458
11.94	4.39235	1.51531
11.97	4.54172	1.51058
12	4.25366	1.50495
12.03	4.39967	1.49942
12.06	4.40046	1.49422
12.09	4.40052	1.48923
12.12	4.39998	1.48428
12.15	4.39857	1.47927
12.18	4.39612	1.47832
12.21	4.53475	1.47437
12.24	4.38833	1.46929
12.27	4.38314	1.46466
12.3	4.37723	1.46005
12.33	4.37082	1.45319
12.36	4.50371	1.44925
12.39	4.35687	1.4445
12.42	4.34964	1.44003
12.45	4.34239	1.43574
12.48	4.33523	1.42816
12.51	4.46882	1.42419
12.54	4.17427	1.41935
12.57	4.31522	1.41465
12.6	4.30929	1.41007
12.63	4.30379	1.40546
12.66	4.29873	1.40065
12.69	4.29425	1.39584
12.72	4.29039	1.39307
12.75	4.28454	1.38759
12.78	4.13778	1.3808
12.81	4.28267	1.37477
12.84	4.28127	1.36916
12.87	4.13418	1.36394
12.9	4.28068	1.35896
12.93	4.28241	1.3541
12.96	4.28595	1.34976
12.99	4.44271	1.34069
13.02	4.45041	1.33586
13.05	4.30575	1.50088
13.08	4.31602	1.663
13.11	4.1862	1.82255
13.14	4.33577	1.98198
13.17	4.48335	2.13564
13.2	4.48339	2.28281
13.23	4.48163	2.42927
13.26	4.20202	2.57082
13.29	4.33711	2.70733
13.32	4.32708	2.83775
13.35	4.31028	2.95568
13.38	4.38918	3.07464
13.41	4.10838	3.18622
13.44	4.20076	3.29099
13.47	4.13828	3.38863
13.5	4.06098	3.47937
13.53	3.97012	3.56381
13.56	3.86759	3.64746
13.59	3.77498	3.71429
13.62	3.65034	3.77968
13.65	3.38579	3.84025
13.68	3.38579	3.89619
13.71	3.27441	3.94794
13.74	3.17427	3.99402
13.77	3.08491	4.03584
13.8	3.00373	4.07406
13.83	2.92835	4.10933
13.86	2.85625	4.14209
13.89	2.6335	4.17241
13.92	2.5608	4.19986
13.95	2.64027	4.22304
13.98	2.6369	4.24949
14.01	2.55027	4.26602
14.04	2.46339	4.28527
14.07	2.17453	4.30341
14.1	2.09005	4.31968
14.13	2.00096	4.33409
14.16	2.04323	4.34712
14.19	1.94323	4.35894
14.22	1.84159	4.37032
14.25	1.74	4.38151
14.28	1.53635	4.39231
14.31	1.54617	4.40248
14.34	1.45941	4.41123
14.37	1.38536	4.41809
14.4	1.32773	4.4237
14.43	1.28581	4.42893
14.46	1.25738	4.43358
14.49	1.22034	4.43873
14.52	1.21609	4.44406
14.55	1.20758	4.4493
14.58	1.22287	4.45478
14.61	1.20445	4.45992
14.64	1.17387	4.46443
14.67	1.13127	4.46829
14.7	1.07828	4.47185
14.73	1.01683	4.47513
14.76	0.949001	4.47783
14.79	0.876999	4.47942
14.82	0.802622	4.48106
14.85	0.727333	4.48295
14.88	0.579107	4.48478
14.91	0.511442	4.48683
14.94	0.449393	4.48937
14.97	0.45147	4.49238
15	0.398695	4.49474
15.03	0.353968	4.49701
15.06	0.317403	4.49951
15.09	0.288938	4.50221
15.12	0.268268	4.50486
15.15	0.25484	4.50653
15.18	0.248023	4.50755
15.21	0.246974	4.50921
15.24	0.250318	4.51072
15.27	0.254927	4.51198
15.3	0.257455	4.51332
15.33	0.257175	4.51513
15.36	0.254375	4.51741
15.39	0.249397	4.52008
15.42	0.242703	4.52205
15.45	0.234781	4.52322
15.48	0.226019	4.52423
15.51	0.2168	4.52514
15.54	0.207542	4.52536
15.57	0.198518	4.52448
15.6	0.189979	4.52303
15.63	0.182159	4.52175
15.66	0.175197	4.52074
15.69	0.169151	4.52021
15.72	0.164105	4.52027
15.75	0.160312	4.52067
15.78	0.15867	4.52098
15.81	0.159355	4.52053
15.84	0.161016	4.5195
15.87	0.161949	4.51812
15.9	0.16227	4.51646
15.93	0.162149	4.51518
15.96	0.161693	4.51392
15.99	0.161076	4.51304
16.02	0.16038	4.51269
16.05	0.159752	4.51268
16.08	0.159308	4.51263
16.11	0.15906	4.5132
16.14	0.15912	4.51413
16.17	0.159526	4.51528
16.2	0.160287	4.51616
16.23	0.161499	4.51646
16.26	0.163115	4.51597
16.29	0.165201	4.51521
16.32	0.167804	4.51509
16.35	0.170903	4.51529
16.38	0.174533	4.51576
16.41	0.178748	4.51628
16.44	0.183524	4.51666
16.47	0.18889	4.51682
16.5	0.19488	4.51711
16.53	0.201485	4.51759
16.56	0.208695	4.51777
16.59	0.216533	4.51729
16.62	0.224964	4.5166
16.65	0.233776	4.51608
16.68	0.242014	4.51543
16.71	0.249412	4.51518
16.74	0.255987	4.51526
16.77	0.261779	4.51588
16.8	0.266731	4.51664
16.83	0.270877	4.51714
16.86	0.274219	4.51753
16.89	0.276753	4.51819
16.92	0.278573	4.51899
16.95	0.279705	4.51928
16.98	0.28021	4.51904
17.01	0.280219	4.51871
17.04	0.279766	4.51816
17.07	0.278872	4.5174
17.1	0.277658	4.5169
17.13	0.276206	4.51663
17.16	0.274599	4.51649
17.19	0.272838	4.51697
17.22	0.270997	4.51749
17.25	0.269134	4.51794
17.28	0.267269	4.51806
17.31	0.265425	4.5177
17.34	0.263629	4.51724
17.37	0.261915	4.51706
17.4	0.260263	4.51677
17.43	0.258661	4.51575
17.46	0.257144	4.51492
17.49	0.255692	4.51418
17.52	0.254274	4.51325
17.55	0.252872	4.51276
17.58	0.251471	4.51282
17.61	0.25007	4.51334
17.64	0.248635	4.51367
17.67	0.247106	4.51426
17.7	0.245553	4.51485
17.73	0.243938	4.51551
17.76	0.242252	4.51573
17.79	0.240498	4.51535
17.82	0.238661	4.51494
17.85	0.236733	4.51448
17.88	0.234724	4.51394
17.91	0.232574	4.51378
17.94	0.230295	4.51398
17.97	0.22796	4.51388
18	0.225527	4.51423
18.03	0.222975	4.51466
18.06	0.220317	4.51457
18.09	0.217546	4.51429
18.12	0.214642	4.51415
18.15	0.211598	4.51425
18.18	0.208476	4.51444
18.21	0.205285	4.51475
18.24	0.202055	4.51459
18.27	0.198752	4.51462
18.3	0.195408	4.5144
18.33	0.192039	4.51412
18.36	0.188626	4.51412
18.39	0.185205	4.51428
18.42	0.181771	4.51458
18.45	0.17831	4.51453
18.48	0.174847	4.51433
18.51	0.171435	4.51404
18.54	0.16806	4.51429
18.57	0.164794	4.51491
18.6	0.161596	4.51578
18.63	0.158488	4.51666
18.66	0.155504	4.51712
18.69	0.152623	4.51724
18.72	0.149824	4.51739
18.75	0.147091	4.51761
18.78	0.14438	4.51746
18.81	0.141708	4.51684
18.84	0.139095	4.51622
18.87	0.136549	4.51619
18.9	0.134125	4.5163
18.93	0.131809	4.51584
18.96	0.129616	4.51561
18.99	0.127616	4.51605
19.02	0.125812	4.51629
19.05	0.124214	4.51624
19.08	0.122776	4.42486
19.11	0.121466	4.34249
19.14	0.12027	4.26688
19.17	0.119193	4.19623
19.2	0.118187	4.13005
19.23	0.117272	4.06868
19.26	0.116451	4.01122
19.29	0.115683	3.95654
19.32	0.114962	3.90453
19.35	0.114278	3.85481
19.38	0.113626	3.80663
19.41	0.113018	3.75978
19.44	0.112494	3.71438
19.47	0.112067	3.6701
19.5	0.111731	3.62711
19.53	0.111442	3.58563
19.56	0.111255	3.5453
19.59	0.111436	3.50599
19.62	0.112333	3.46783
19.65	0.114284	3.43092
19.68	0.117574	3.39508
19.71	0.122361	3.35997
19.74	0.128736	3.32582
19.77	0.136709	3.2924
19.8	0.146285	3.25927
19.83	0.157486	3.22647
19.86	0.170349	3.19451
19.89	0.184916	3.16312
19.92	0.201268	3.13237
19.95	0.219482	3.09889
19.98	0.265405	3.06975
20.01	0.261657	3.04058
20.04	0.285539	3.01147
20.07	0.311189	2.98239
20.1	0.338575	2.95341
20.13	0.367625	2.92454
20.16	0.398308	2.89589
20.19	0.430587	2.8676
20.22	0.464476	2.83995
20.25	0.499942	2.81277
20.28	0.536958	2.78603
20.31	0.57547	2.75975
20.34	0.615404	2.72696
20.37	0.702815	2.70209
20.4	0.699199	2.67728
20.43	0.742942	2.65287
20.46	0.787753	2.62908
20.49	0.833317	2.60579
20.52	0.879243	2.5832
20.55	0.925184	2.56107
20.58	0.970871	2.53916
20.61	1.01617	2.51754
20.64	1.061	2.49633
20.67	1.10538	2.4754
20.7	1.14923	2.45495
20.73	1.19258	2.43485
20.76	1.23539	2.41508
20.79	1.27761	2.39588
20.82	1.31915	2.37716
20.85	1.35993	2.35873
20.88	1.37409	2.34069
20.91	1.43901	2.32298
20.94	1.47738	2.30554
20.97	1.51503	2.28829
21	1.552	2.27133
21.03	1.58838	2.25476
21.06	1.62424	2.23865
21.09	1.65968	2.22288
21.12	1.69473	2.20731
21.15	1.72946	2.19187
21.18	1.76392	2.1767
21.21	1.79815	2.16205
21.24	1.8322	2.1426
21.27	1.89981	2.12554
21.3	1.98086	2.11235
21.33	1.93347	2.09834
21.36	1.96722	2.08157
21.39	2.08594	2.06456
21.42	2.12117	2.05152
21.45	2.06945	2.03865
21.48	2.10356	2.02633
21.51	2.13749	2.01394
21.54	2.17114	2.00143
21.57	2.20439	1.98932
21.6	2.23722	1.97764
21.63	2.26957	1.96622
21.66	2.3013	1.95492
21.69	2.33239	1.94376
21.72	2.36284	1.93287
21.75	2.39272	1.92234
21.78	2.42206	1.91213
21.81	2.4509	1.90184
21.84	2.47931	1.89135
21.87	2.50731	1.881
21.9	2.53496	1.87099
21.93	2.56232	1.85788
21.96	2.68725	1.8464
21.99	2.7145	1.83393
22.02	2.74247	1.82386
22.05	2.66862	1.81328
22.08	2.69822	1.80339
22.11	2.72999	1.79432
22.14	2.7614	1.78598
22.17	2.71158	1.77789
22.2	2.73906	1.76983
22.23	2.84755	1.76184
22.26	2.87395	1.75185
22.29	2.92456	1.74375
22.32	2.83865	1.73511
22.35	2.94935	1.72686
22.38	2.97422	1.71862
22.41	2.99937	1.71034
22.44	3.02487	1.70205
22.47	3.05087	1.69397
22.5	3.07741	1.68588
22.53	3.10463	1.67785
22.56	3.13251	1.66976
22.59	3.1609	1.6616
22.62	3.18966	1.6534
22.65	3.21859	1.64534
22.68	3.24753	1.63743
22.71	3.27634	1.62949
22.74	3.3049	1.62166
22.77	3.33311	1.61393
22.8	3.36091	1.6063
22.83	3.38814	1.60849
22.86	3.44122	1.59704
22.89	3.467	1.58895
22.92	3.36638	1.58051
22.95	3.49121	1.57253
22.98	3.51183	1.565
23.01	3.52961	1.55777
23.04	3.54717	1.55081
23.07	3.56548	1.54416
23.1	3.58458	1.53799
23.13	3.60413	1.53206
23.16	3.62377	1.52616
23.19	3.53343	1.52039
23.22	3.66236	1.51455
23.25	3.68072	1.50871
23.28	3.6982	1.50287
23.31	3.71443	1.49708
23.34	3.72907	1.4913
23.37	3.74128	1.48566
23.4	3.75012	1.4801
23.43	3.75534	1.47459
23.46	3.75833	1.46916
23.49	3.76008	1.46383
23.52	3.76157	1.45693
23.55	3.88777	1.45216
23.58	3.76568	1.44691
23.61	3.76868	1.44289
23.64	3.89983	1.43494
23.67	3.90476	1.4296
23.7	3.78116	1.42362
23.73	3.78653	1.41807
23.76	3.66843	1.41268
23.79	3.67526	1.40751
23.82	3.80768	1.40248
23.85	3.81633	1.39749
23.88	3.82546	1.39254
23.91	3.83485	1.3876
23.94	3.84429	1.38267
23.97	3.8537	1.37778
24	3.86301	1.37285
24.03	3.87227	1.36796
24.06	3.88155	1.35976
24.09	4.02886	1.3552
24.12	3.89993	1.35015
24.15	3.90917	1.34527
24.18	3.91843	1.34051
24.21	3.92804	1.3357
24.24	3.9383	1.33087
24.27	3.94996	1.32608
24.3	3.96418	1.32134
24.33	3.98117	1.31662
24.36	3.99959	1.31196
24.39	4.01867	1.30672
24.42	4.17916	1.30264
24.45	3.93144	1.29797
24.48	4.07361	1.29364
24.51	4.09075	1.28778
24.54	4.12346	1.28362
24.57	4.13934	1.27824
24.6	4.28392	1.27093
24.63	4.29972	1.26667
24.66	4.16948	1.26213
24.69	4.18345	1.2577
24.72	4.19666	1.25356
24.75	4.20926	1.24925
24.78	4.36885	1.24598
24.81	4.38178	1.24003
24.84	4.39496	1.23725
24.87	4.25846	1.23416
24.9	4.27166	1.2315
24.93	4.28561	1.22922
24.96	4.30055	1.22703
24.99	4.17873	1.22485
25.02	4.33339	1.2227
25.05	4.35023	1.22061
25.08	4.36693	1.21857
25.11	4.38335	1.3923
25.14	4.3994	1.56339
25.17	4.41503	1.73226
25.2	4.42522	1.89889
25.23	4.42952	2.06315
25.26	4.42696	2.22412
25.29	4.41864	2.38113
25.32	4.26407	2.53327
25.35	4.3886	2.67936
25.38	4.36642	2.81864
25.41	4.3366	2.9509
25.44	4.15205	3.0762
25.47	4.09665	3.19417
25.5	4.02635	3.30473
25.53	3.94245	3.4079
25.56	3.99278	3.50396
25.59	3.88844	3.59377
25.62	3.77516	3.67793
25.65	3.65384	3.76084
25.68	3.39506	3.83139
25.71	3.24688	3.89617
25.74	3.12017	3.95578
25.77	3.14984	4.01003
25.8	3.03716	4.05964
25.83	2.93077	4.10801
25.86	2.88595	4.14767
25.89	2.73183	4.18404
25.92	2.6376	4.2175
25.95	2.54574	4.24743
25.98	2.45564	4.27496
26.01	2.36673	4.30002
26.04	2.27813	4.32316
26.07	2.18877	4.34443
26.1	2.10235	4.36304
26.13	2.01848	4.37943
26.16	1.93738	4.39413
26.19	1.85759	4.40721
26.22	1.77775	4.41989
26.25	1.69729	4.43172
26.28	1.61718	4.44251
26.31	1.5404	4.45215
26.34	1.4709	4.46024
26.37	1.41209	4.4675
26.4	1.3653	4.47432
26.43	1.32963	4.4806
26.46	1.30294	4.48585
26.49	1.28409	4.49079
26.52	1.27251	4.49507
26.55	1.26729	4.49896
26.58	1.25044	4.50289
26.61	1.26773	4.50638
26.64	1.26164	4.50905
26.67	1.24732	4.51173
26.7	1.22434	4.5145
26.73	1.1931	4.51739
26.76	1.09817	4.52003
26.79	1.11024	4.5219
26.82	1.06115	4.52297
26.85	1.00857	4.52305
26.88	0.953612	4.52279
26.91	0.896999	4.52219
26.94	0.839766	4.52138
26.97	0.78312	4.52128
27	0.728276	4.52258
27.03	0.676149	4.52361
27.06	0.627614	4.52375
27.09	0.583094	4.52414
27.12	0.542946	4.52466
27.15	0.507243	4.52506
27.18	0.475876	4.52561
27.21	0.448502	4.52631
27.24	0.424684	4.52682
27.27	0.403897	4.52642
27.3	0.385663	4.52585
27.33	0.369593	4.52538
27.36	0.355364	4.52509
27.39	0.342681	4.52519
27.42	0.331324	4.52537
27.45	0.321153	4.52573
27.48	0.312043	4.52621
27.51	0.303865	4.52613
27.54	0.296481	4.52621
27.57	0.289841	4.52667
27.6	0.28385	4.52721
27.63	0.278463	4.52806
27.66	0.273581	4.52911
27.69	0.269152	4.52984
27.72	0.265141	4.53018
27.75	0.261488	4.53068
27.78	0.258142	4.53107
27.81	0.255121	4.53145
27.84	0.25242	4.53191
27.87	0.250035	4.53211
27.9	0.247976	4.53181
27.93	0.246231	4.53126
27.96	0.244898	4.53084
27.99	0.243829	4.53069
28.02	0.242992	4.53073
28.05	0.242336	4.53045
28.08	0.241801	4.5298
28.11	0.241367	4.5293
28.14	0.241012	4.52938
28.17	0.240804	4.52997
28.2	0.240771	4.53036
28.23	0.240939	4.53068
28.26	0.241368	4.53139
28.29	0.242112	4.53198
28.32	0.2432	4.53253
28.35	0.244681	4.53258
28.38	0.246585	4.53261
28.41	0.248941	4.53262
28.44	0.251752	4.53227
28.47	0.254987	4.53166
28.5	0.258641	4.53132
28.53	0.262713	4.53158
28.56	0.267235	4.53169
28.59	0.272177	4.5314
28.62	0.277555	4.53046
28.65	0.283396	4.53059
28.68	0.289664	4.53132
28.71	0.296285	4.53214
28.74	0.303143	4.53247
28.77	0.31018	4.53237
28.8	0.317299	4.53196
28.83	0.324382	4.531
28.86	0.331244	4.52985
28.89	0.337942	4.52874
28.92	0.344417	4.52754
28.95	0.350668	4.52592
28.98	0.356707	4.52435
29.01	0.362545	4.52402
29.04	0.36823	4.52368
29.07	0.373727	4.52393
29.1	0.379043	4.52451
29.13	0.384183	4.52527
29.16	0.389077	4.52589
29.19	0.393738	4.52585
29.22	0.398184	4.52504
29.25	0.402365	4.5245
29.28	0.40628	4.52438
29.31	0.409958	4.52373
29.34	0.413391	4.52227
29.37	0.416672	4.52075
29.4	0.419833	4.52022
29.43	0.422885	4.52075
29.46	0.425889	4.52172
29.49	0.428874	4.52179
29.52	0.431805	4.52212
29.55	0.434638	4.52239
29.58	0.437381	4.52264
29.61	0.440037	4.52259
29.64	0.442638	4.52252
29.67	0.44508	4.52237
29.7	0.447344	4.52249
29.73	0.449482	4.52213
29.76	0.451466	4.5214
29.79	0.453299	4.52119
29.82	0.454983	4.52129
29.85	0.456469	4.52126
29.88	0.457803	4.52105
29.91	0.458934	4.52139
29.94	0.459817	4.52171
29.97	0.460486	4.52115
30	0.4609	4.52028
30.03	0.461048	4.5202
30.06	0.46096	4.52054
30.09	0.460579	4.52058
30.12	0.459885	4.52039
30.15	0.458954	4.51987
30.18	0.457801	4.51969
30.21	0.45643	4.52031
30.24	0.454872	4.52071
30.27	0.453065	4.52072
30.3	0.451041	4.52026
30.33	0.448771	4.51955
30.36	0.4462	4.51903
30.39	0.443369	4.51805
30.42	0.440278	4.51734
30.45	0.436949	4.51737
30.48	0.433388	4.51795
30.51	0.429575	4.51832
30.54	0.425528	4.5189
30.57	0.421342	4.51934
30.6	0.417018	4.51976
30.63	0.412534	4.5199
30.66	0.407938	4.52032
30.69	0.403173	4.52102
30.72	0.398268	4.52107
30.75	0.393261	4.52042
30.78	0.388119	4.51959
30.81	0.382869	4.51841
30.84	0.377563	4.51734
30.87	0.372178	4.5166
30.9	0.366786	4.51649
30.93	0.361391	4.51673
30.96	0.35599	4.5176
30.99	0.350652	4.51857
31.02	0.34539	4.51979
31.05	0.340123	4.52064
31.08	0.334836	4.52109
31.11	0.32952	4.52089
31.14	0.324162	4.42842
31.17	0.318833	4.34533
31.2	0.313495	4.27038
31.23	0.308208	4.20139
31.26	0.302967	4.13691
31.29	0.297798	4.0762
31.32	0.292726	4.01859
31.35	0.287747	3.96302
31.38	0.282845	3.90992
31.41	0.278081	3.85863
31.44	0.273472	3.80861
31.47	0.269017	3.75956
31.5	0.264817	3.7113
31.53	0.260956	3.66374
31.56	0.257442	3.617
31.59	0.254396	3.57613
31.62	0.260741	3.53099
31.65	0.250306	3.48585
31.68	0.249645	3.44311
31.71	0.250104	3.40075
31.74	0.251853	3.35887
31.77	0.255085	3.31802
31.8	0.259924	3.27873
31.83	0.266463	3.2407
31.86	0.274804	3.20342
31.89	0.284918	3.16641
31.92	0.296792	3.12988
31.95	0.31048	3.09429
31.98	0.326071	3.0596
32.01	0.343621	3.02602
32.04	0.363241	2.99363
32.07	0.385076	2.96193
32.1	0.409274	2.93088
32.13	0.4359	2.90028
32.16	0.465022	2.87003
32.19	0.496622	2.84029
32.22	0.530686	2.81149
32.25	0.567219	2.78355
32.28	0.606226	2.75647
32.31	0.647607	2.72996
32.34	0.691227	2.70368
32.37	0.73695	2.67802
32.4	0.784625	2.65257
32.43	0.834075	2.62776
32.46	0.88516	2.60347
32.49	0.937725	2.5798
32.52	0.982739	2.55663
32.55	1.04627	2.5336
32.58	1.10166	2.51066
32.61	1.15755	2.48811
32.64	1.21365	2.46636
32.67	1.2697	2.44501
32.7	1.3254	2.42407
32.73	1.38061	2.40385
32.76	1.43527	2.38402
32.79	1.48933	2.3642
32.82	1.54279	2.34496
32.85	1.59567	2.32619
32.88	1.64792	2.30784
32.91	1.69944	2.2898
32.94	1.75019	2.27232
32.97	1.80002	2.25523
33	1.84879	2.23852
33.03	1.89639	2.2223
33.06	1.94284	2.20659
33.09	1.98818	2.19147
33.12	2.03247	2.17679
33.15	2.07581	2.16228
33.18	2.11826	2.14792
33.21	2.15994	2.13376
33.24	2.20095	2.12003
33.27	2.24143	2.10651
33.3	2.28148	2.09336
33.33	2.32118	2.07607
33.36	2.46018	2.06376
33.39	2.39981	2.05086
33.42	2.43874	2.03799
33.45	2.47737	2.02537
33.48	2.51573	2.01281
33.51	2.55389	2.0005
33.54	2.59195	1.9881
33.57	2.62988	1.9757
33.6	2.66763	1.96352
33.63	2.70511	1.95184
33.66	2.74239	1.94052
33.69	2.77967	1.92918
33.72	2.81695	1.91738
33.75	2.85405	1.90578
33.78	2.89071	1.89469
33.81	2.92667	1.88397
33.84	2.96159	1.87359
33.87	2.99533	1.863
33.9	3.02803	1.85211
33.93	3.05983	1.84125
33.96	3.09077	1.83089
33.99	3.12077	1.82106
34.02	3.14966	1.81133
34.05	3.1772	1.80144
34.08	3.2033	1.7913
34.11	3.22785	1.78139
34.14	3.25082	1.77183
34.17	3.27211	1.76263
34.2	3.29161	1.75354
34.23	3.30921	1.74454
34.26	3.22534	1.73553
34.29	3.33868	1.72641
34.32	3.35071	1.71745
34.35	3.36121	1.7045
34.38	3.48274	1.69275
34.41	3.49061	1.68441
34.44	3.38484	1.67588
34.47	3.39046	1.66748
34.5	3.39524	1.65925
34.53	3.39932	1.65112
34.56	3.40278	1.64309
34.59	3.40573	1.63524
34.62	3.40829	1.62738
34.65	3.41051	1.61964
34.68	3.4126	1.60896
34.71	3.53138	1.60198
34.74	3.41784	1.59453
34.77	3.42128	1.5871
34.8	3.42511	1.57985
34.83	3.42903	1.57278
34.86	3.43304	1.56574
34.89	3.43709	1.55875
34.92	3.44124	1.55213
34.95	3.44552	1.54561
34.98	3.44993	1.5391
35.01	3.45445	1.53268
35.04	3.45913	1.52641
35.07	3.46399	1.5201
35.1	3.46919	1.51387
35.13	3.4748	1.50786
35.16	3.48091	1.50187
35.19	3.48757	1.49584
35.22	3.49479	1.48994
35.25	3.50247	1.48419
35.28	3.39817	1.47843
35.31	3.40655	1.47274
35.34	3.52755	1.46713
35.37	3.5362	1.46165
35.4	3.54498	1.45619
35.43	3.5538	1.45081
35.46	3.56253	1.44554
35.49	3.57092	1.44041
35.52	3.57884	1.43527
35.55	3.58634	1.43011
35.58	3.59347	1.42504
35.61	3.48381	1.42006
35.64	3.60661	1.41531
35.67	3.61272	1.41057
35.7	3.61853	1.40572
35.73	3.62411	1.40093
35.76	3.62945	1.39621
35.79	3.63471	1.39172
35.82	3.63982	1.38732
35.85	3.64479	1.38285
35.88	3.64988	1.37833
35.91	3.65527	1.37384
35.94	3.6611	1.36959
35.97	3.66727	1.36549
36	3.67354	1.36134
36.03	3.67995	1.35716
36.06	3.68686	1.35293
36.09	3.69439	1.34889
36.12	3.70243	1.34506
36.15	3.71067	1.34115
36.18	3.71892	1.33722
36.21	3.7275	1.33348
36.24	3.73667	1.3297
36.27	3.74646	1.32597
36.3	3.7568	1.32493
36.33	3.90067	1.32123
36.36	3.77894	1.31672
36.39	3.79063	1.31268
36.42	3.80276	1.3087
36.45	3.81506	1.30489
36.48	3.82782	1.30119
36.51	3.84083	1.29757
36.54	3.85401	1.29408
36.57	3.86696	1.28762
36.6	4.0134	1.2847
36.63	3.89008	1.28183
36.66	3.89986	1.27879
36.69	3.90844	1.27575
36.72	3.91613	1.27268
36.75	3.9234	1.26966
36.78	3.93038	1.26665
36.81	3.93719	1.26369
36.84	3.94398	1.26094
36.87	3.95077	1.25845
36.9	3.95777	1.25618
36.93	3.96488	1.25408
36.96	3.97169	1.25211
36.99	3.97804	1.25023
37.02	3.98415	1.24843
37.05	3.9902	1.24669
37.08	3.99629	1.24498
37.11	4.002	1.24327
37.14	4.00704	1.24558
37.17	4.14667	1.41059
37.2	4.01495	1.5721
37.23	3.88492	1.73313
37.26	4.01904	1.8921
37.29	4.01658	2.04883
37.32	4.00956	2.20264
37.35	3.99785	2.35307
37.38	3.98103	2.49931
37.41	3.95921	2.64065
37.44	3.93244	2.77644
37.47	3.90075	2.90607
37.5	3.72943	3.02923
37.53	3.82014	3.14587
37.56	3.76856	3.25577
37.59	3.70944	3.35279
37.62	3.70628	3.44926
37.65	3.57492	3.53963
37.68	3.49959	3.62242
37.71	3.41822	3.69273
37.74	3.36893	3.76246
37.77	3.23638	3.8255
37.8	3.1365	3.88278
37.83	3.0308	3.93484
37.86	2.91948	3.98241
37.89	2.80305	4.02593
37.92	2.68211	4.06684
37.95	2.55782	4.10522
37.98	2.43126	4.13325
38.01	2.31045	4.161
38.04	2.18268	4.18372
38.07	1.92054	4.21101
38.1	1.92054	4.23639
38.13	1.79498	4.25911
38.16	1.67239	4.28021
38.19	1.55472	4.30036
38.22	1.46091	4.31799
38.25	1.33811	4.33303
38.28	1.2395	4.34718
38.31	1.14724	4.36042
38.34	1.06118	4.37293
38.37	0.981327	4.38448
38.4	0.90849	4.39483
38.43	0.844048	4.40399
38.46	0.789103	4.41191
38.49	0.742858	4.41868
38.52	0.641421	4.42535
38.55	0.668461	4.4315
38.58	0.639227	4.43728
38.61	0.615446	4.44257
38.64	0.558687	4.44694
38.67	0.58432	4.45109
38.7	0.576518	4.4551
38.73	0.5738	4.45868
38.76	0.575989	4.46246
38.79	0.58258	4.46602
38.82	0.592837	4.46885
38.85	0.605709	4.47125
38.88	0.620146	4.47347
38.91	0.628271	4.4757
38.94	0.642814	4.47787
38.97	0.655941	4.47996
39	0.677099	4.48212
39.03	0.687946	4.48464
39.06	0.696628	4.48688
39.09	0.702845	4.48894
39.12	0.688619	4.49129
39.15	0.70722	4.49348
39.18	0.705565	4.4949
39.21	0.701518	4.4963
39.24	0.695342	4.49735
39.27	0.687249	4.49797
39.3	0.677531	4.49843
39.33	0.666489	4.49903
39.36	0.654352	4.49949
39.39	0.641355	4.49964
39.42	0.627726	4.5
39.45	0.613508	4.4968
39.48	0.610564	4.49725
39.51	0.58411	4.49666
39.54	0.569039	4.49593
39.57	0.553853	4.49545
39.6	0.53851	4.49551
39.63	0.523066	4.49566
39.66	0.507652	4.49583
39.69	0.492303	4.49649
39.72	0.47707	4.49683
39.75	0.462044	4.49652
39.78	0.447232	4.49597
39.81	0.432663	4.4954
39.84	0.418387	4.49459
39.87	0.404395	4.49354
39.9	0.390732	4.49264
39.93	0.377495	4.49213
39.96	0.364738	4.49179
39.99	0.352506	4.49162
40.02	0.340908	4.49177
40.05	0.329923	4.49213
40.08	0.319613	4.49267
40.11	0.310016	4.49338
40.14	0.301108	4.4936
40.17	0.29298	4.49326
40.2	0.285638	4.49244
40.23	0.279095	4.49165
40.26	0.273399	4.49142
40.29	0.26858	4.49187
40.32	0.264599	4.49285
40.35	0.26151	4.49373
40.38	0.247677	4.49432
40.41	0.257943	4.49477
40.44	0.257463	4.49535
40.47	0.257815	4.4959
40.5	0.258959	4.49646
40.53	0.260867	4.49678
40.56	0.263434	4.49695
40.59	0.266609	4.49713
40.62	0.270304	4.49731
40.65	0.274455	4.49748
40.68	0.279014	4.49769
40.71	0.283939	4.49784
40.74	0.289175	4.49797
40.77	0.294717	4.49794
40.8	0.300564	4.49739
40.83	0.306635	4.49705
40.86	0.31289	4.49745
40.89	0.319304	4.49797
40.92	0.325804	4.49879
40.95	0.332392	4.49963
40.98	0.339028	4.49988
41.01	0.345618	4.49914
41.04	0.352144	4.49794
41.07	0.358611	4.49683
41.1	0.364946	4.49661
41.13	0.371131	4.49675
41.16	0.377151	4.49701
41.19	0.382963	4.4974
41.22	0.388625	4.49794
41.25	0.394103	4.49907
41.28	0.399345	4.50002
41.31	0.404388	4.50072
41.34	0.409248	4.50105
41.37	0.413873	4.50102
41.4	0.418289	4.50051
41.43	0.422419	4.49974
41.46	0.42628	4.49909
41.49	0.429907	4.49842
41.52	0.433256	4.49795
41.55	0.436352	4.49776
41.58	0.439214	4.49815
41.61	0.441766	4.49904
41.64	0.444029	4.49982
41.67	0.446021	4.50048
41.7	0.447686	4.50107
41.73	0.449062	4.50087
41.76	0.450167	4.50018
41.79	0.450996	4.49965
41.82	0.451587	4.49972
41.85	0.451962	4.49961
41.88	0.452067	4.49932
41.91	0.451969	4.49881
41.94	0.451665	4.49832
41.97	0.451111	4.49825
42	0.450308	4.49844
42.03	0.449257	4.49895
42.06	0.447967	4.49922
42.09	0.446469	4.49961
42.12	0.444727	4.49994
42.15	0.442733	4.49989
42.18	0.440539	4.5002
42.21	0.438123	4.5
42.24	0.435465	4.49989
42.27	0.432616	4.50043
42.3	0.429529	4.50066
42.33	0.426231	4.5008
42.36	0.422731	4.50092
42.39	0.419	4.50105
42.42	0.41507	4.50148
42.45	0.410994	4.50217
42.48	0.406773	4.50289
42.51	0.402435	4.50352
42.54	0.397995	4.50396
42.57	0.393425	4.50426
42.6	0.388771	4.50407
42.63	0.384015	4.50388
42.66	0.379106	4.50394
42.69	0.374044	4.50428
42.72	0.368828	4.5049
42.75	0.363385	4.50527
42.78	0.357754	4.50556
42.81	0.351961	4.50568
42.84	0.346053	4.5052
42.87	0.340016	4.50441
42.9	0.333933	4.50381
42.93	0.327835	4.50343
42.96	0.321676	4.50302
42.99	0.315434	4.50274
43.02	0.309154	4.50258
43.05	0.30284	4.50256
43.08	0.296419	4.50285
43.11	0.289936	4.50339
43.14	0.283469	4.50399
43.17	0.276995	4.5044
43.2	0.270511	4.4152
43.23	0.264036	4.33459
43.26	0.257641	4.26134
43.29	0.251419	4.19414
43.32	0.24534	4.13153
43.35	0.239341	4.07213
43.38	0.23349	4.01542
43.41	0.227797	3.96109
43.44	0.222204	3.90868
43.47	0.216706	3.85819
43.5	0.211335	3.80924
43.53	0.206083	3.76152
43.56	0.201037	3.71527
43.59	0.196283	3.67023
43.62	0.191945	3.62651
43.65	0.188204	3.58403
43.68	0.18517	3.54264
43.71	0.182903	3.50176
43.74	0.181493	3.46184
43.77	0.18112	3.4229
43.8	0.181849	3.38468
43.83	0.1838	3.34742
43.86	0.18721	3.3114
43.89	0.192131	3.2763
43.92	0.198475	3.24172
43.95	0.206169	3.20783
43.98	0.215239	3.17457
44.01	0.225631	3.142
44.04	0.23721	3.10993
44.07	0.250084	3.07852
44.1	0.264411	3.0475
44.13	0.280206	3.01671
44.16	0.297471	2.9866
44.19	0.316297	2.95748
44.22	0.336755	2.92888
44.25	0.358879	2.90071
44.28	0.382655	2.8731
44.31	0.408121	2.84594
44.34	0.435274	2.8193
44.37	0.464088	2.79311
44.4	0.494585	2.76747
44.43	0.526804	2.74228
44.46	0.560691	2.7177
44.49	0.596261	2.69362
44.52	0.633379	2.6699
44.55	0.672004	2.64647
44.58	0.711979	2.62358
44.61	0.753242	2.60118
44.64	0.795684	2.57906
44.67	0.839012	2.5572
44.7	0.883068	2.53565
44.73	0.92743	2.51437
44.76	0.971684	2.49343
44.79	1.01565	2.47282
44.82	1.05931	2.4524
44.85	1.10263	2.43225
44.88	1.14569	2.4127
44.91	1.18859	2.39355
44.94	1.23144	2.3743
44.97	1.27412	2.35521
45	1.31658	2.33638
45.03	1.35884	2.31765
45.06	1.4008	2.29915
45.09	1.44231	2.28099
45.12	1.48334	2.26305
45.15	1.52383	2.24528
45.18	1.56369	2.22786
45.21	1.60299	2.21076
45.24	1.6417	2.19398
45.27	1.67984	2.17739
45.3	1.71743	2.16112
45.33	1.75436	2.14501
45.36	1.79062	2.12905
45.39	1.82603	2.11345
45.42	1.86062	2.0982
45.45	1.89426	2.08333
45.48	1.92698	2.06872
45.51	1.9588	2.04945
45.54	2.07086	2.03528
45.57	2.01979	2.02094
45.6	2.04914	2.00688
45.63	2.07805	1.99315
45.66	2.10675	1.97968
45.69	2.13535	1.96644
45.72	2.16394	1.95332
45.75	2.19263	1.9404
45.78	2.22136	1.92783
45.81	2.25005	1.91552
45.84	2.27866	1.90341
45.87	2.30714	1.89149
45.9	2.33543	1.87995
45.93	2.36348	1.86422
45.96	2.48454	1.85338
45.99	2.41867	1.84216
46.02	2.44577	1.83103
46.05	2.47258	1.81995
46.08	2.49907	1.80925
46.11	2.52511	1.79434
46.14	2.64781	1.78463
46.17	2.5758	1.77465
46.2	2.60032	1.76477
46.23	2.62434	1.75489
46.26	2.64786	1.74499
46.29	2.67095	1.73555
46.32	2.69356	1.72636
46.35	2.71575	1.71719
46.38	2.73754	1.70821
46.41	2.75905	1.69936
46.44	2.69925	1.69068
46.47	2.80167	1.682
46.5	2.82277	1.67347
46.53	2.84359	1.66526
46.56	2.86398	1.65727
46.59	2.88389	1.64949
46.62	2.90338	1.64209
46.65	2.92259	1.63462
46.68	2.94165	1.62709
46.71	2.96065	1.61967
46.74	2.97963	1.61235
46.77	2.99859	1.60508
46.8	3.01744	1.59787
46.83	3.0361	1.59091
46.86	2.96142	1.58396
46.89	3.07328	1.57699
46.92	3.09179	1.5702
46.95	3.1102	1.56363
46.98	3.1285	1.55711
47.01	3.14665	1.55057
47.04	3.06757	1.54405
47.07	3.1827	1.53758
47.1	3.2007	1.53122
47.13	3.21877	1.5249
47.16	3.23714	1.5186
47.19	3.25593	1.51226
47.22	3.27511	1.50599
47.25	3.29442	1.49971
47.28	3.31362	1.49346
47.31	3.33242	1.48749
47.34	3.35057	1.48169
47.37	3.368	1.47564
47.4	3.38478	1.46964
47.43	3.40097	1.4637
47.46	3.41681	1.45434
47.49	3.55275	1.44871
47.52	3.44757	1.44305
47.55	3.46227	1.43722
47.58	3.47626	1.43146
47.61	3.4896	1.42296
47.64	3.62396	1.4141
47.67	3.63675	1.40875
47.7	3.52691	1.40298
47.73	3.53865	1.39404
47.76	3.67267	1.38578
47.79	3.68377	1.3808
47.82	3.57123	1.37533
47.85	3.58127	1.37006
47.88	3.59112	1.3649
47.91	3.60101	1.35979
47.94	3.61122	1.35483
47.97	3.62191	1.34984
48	3.63326	1.34501
48.03	3.64524	1.34027
48.06	3.6576	1.33551
48.09	3.67001	1.33086
48.12	3.6823	1.32622
48.15	3.69432	1.32164
48.18	3.70595	1.31716
48.21	3.71709	1.31266
48.24	3.72761	1.30823
48.27	3.73753	1.30386
48.3	3.74682	1.29954
48.33	3.75557	1.29526
48.36	3.76375	1.29104
48.39	3.65106	1.28374
48.42	3.90605	1.27988
48.45	3.78553	1.27572
48.48	3.79224	1.27167
48.51	3.79865	1.26768
48.54	3.68312	1.26374
48.57	3.68847	1.25985
48.6	3.81599	1.25601
48.63	3.82175	1.25222
48.66	3.70492	1.24847
48.69	3.71073	1.24476
48.72	3.83983	1.24413
48.75	3.97569	1.2405
48.78	3.85209	1.23622
48.81	3.85787	1.23098
48.84	3.99293	1.22739
48.87	3.86711	1.22347
48.9	3.87019	1.21973
48.93	3.87202	1.21614
48.96	3.87257	1.2127
48.99	3.8721	1.20938
49.02	3.87082	1.20618
49.05	3.86899	1.20309
49.08	3.86695	1.20006
49.11	3.86487	1.19715
49.14	3.86302	1.19432
49.17	3.86147	1.19168
49.2	3.86029	1.18926
49.23	3.8594	1.34728
49.26	3.85888	1.50292
49.29	3.85849	1.65624
49.32	3.72579	1.80722
49.35	3.83843	1.95579
49.38	3.81229	2.09853
49.41	3.86035	2.24183
49.44	3.73325	2.38102
49.47	3.68558	2.51608
49.5	3.63439	2.64649
49.53	3.57887	2.77189
49.56	3.5174	2.89209
49.59	3.44778	3.00697
49.62	3.36838	3.11624
49.65	3.14969	3.21996
49.68	3.18159	3.31797
49.71	3.07553	3.41008
49.74	2.83214	3.49622
49.77	2.84387	3.57651
49.8	2.72517	3.65113
49.83	2.60947	3.72044
49.86	2.49814	3.7853
49.89	2.39179	3.84557
49.92	2.2912	3.9011
49.95	2.19716	3.95248
49.98	2.10899	4.00069
50.01	2.02447	4.04606
50.04	1.94191	4.08776
50.07	1.86046	4.12543
50.1	1.77958	4.1521
50.13	1.74551	4.18236
50.16	1.61774	4.21108
50.19	1.53577	4.2365
50.22	1.45753	4.2598
50.25	1.38715	4.28167
50.28	1.32648	4.3024
50.31	1.18997	4.3213
50.34	1.22706	4.33869
50.37	1.18318	4.35459
50.4	1.14133	4.3694
50.43	1.10239	4.38329
50.46	1.06814	4.39599
50.49	1.0409	4.40768
50.52	1.02241	4.41833
50.55	1.0125	4.42809
50.58	1.01032	4.42868
50.61	1.04357	4.43567
50.64	1.02703	4.44286
50.67	1.04253	4.44895
50.7	1.05746	4.45444
50.73	1.06836	4.46002
50.76	1.07386	4.46574
50.79	1.07324	4.47142
50.82	1.0656	4.47697
50.85	1.05022	4.48219
50.88	1.02776	4.48653
50.91	1.00049	4.49024
50.94	0.970088	4.49262
50.97	0.937375	4.49392
51	0.902996	4.49485
51.03	0.820782	4.49619
51.06	0.831184	4.49795
51.09	0.79502	4.49965
51.12	0.759511	4.50102
51.15	0.725046	4.50188
51.18	0.691751	4.50287
51.21	0.659671	4.50357
51.24	0.628746	4.50395
51.27	0.59884	4.50385
51.3	0.569812	4.50392
51.33	0.541488	4.50353
51.36	0.513789	4.50262
51.39	0.486645	4.50195
51.42	0.460052	4.50168
51.45	0.434109	4.50196
51.48	0.408923	4.50226
51.51	0.356475	4.50256
51.54	0.361259	4.50294
51.57	0.339034	4.5031
51.6	0.318097	4.50269
51.63	0.298624	4.5023
51.66	0.280723	4.5019
51.69	0.264464	4.50145
51.72	0.249955	4.50122
51.75	0.23724	4.50118
51.78	0.226364	4.50141
51.81	0.217338	4.50153
51.84	0.210114	4.50129
51.87	0.204562	4.50097
51.9	0.200484	4.50065
51.93	0.197793	4.50032
51.96	0.196358	4.50038
51.99	0.19602	4.50083
52.02	0.19655	4.50181
52.05	0.197767	4.50284
52.08	0.199493	4.50345
52.11	0.201558	4.50384
52.14	0.203847	4.50368
52.17	0.206266	4.50336
52.2	0.208685	4.50343
52.23	0.210976	4.50367
52.26	0.21307	4.50402
52.29	0.214913	4.50431
52.32	0.216448	4.50449
52.35	0.217566	4.50491
52.38	0.218186	4.50539
52.41	0.218219	4.50568
52.44	0.217568	4.50591
52.47	0.216163	4.50597
52.5	0.213958	4.50584
52.53	0.210875	4.50555
52.56	0.206868	4.50556
52.59	0.201971	4.50604
52.62	0.196251	4.50666
52.65	0.189869	4.50712
52.68	0.183098	4.50714
52.71	0.176179	4.50696
52.74	0.169267	4.5064
52.77	0.162495	4.50567
52.8	0.155956	4.50528
52.83	0.149673	4.50527
52.86	0.143642	4.50532
52.89	0.137902	4.50549
52.92	0.132556	4.50572
52.95	0.127629	4.50574
52.98	0.123166	4.50568
53.01	0.119236	4.50573
53.04	0.115807	4.50641
53.07	0.112879	4.50697
53.1	0.110496	4.5072
53.13	0.108686	4.50723
53.16	0.107483	4.50708
53.19	0.106856	4.50647
53.22	0.106777	4.50615
53.25	0.107291	4.50607
53.28	0.108432	4.50575
53.31	0.110194	4.50533
53.34	0.112551	4.50477
53.37	0.115459	4.50469
53.4	0.118868	4.50497
53.43	0.122787	4.50547
53.46	0.127225	4.50597
53.49	0.132155	4.50607
53.52	0.137503	4.50559
53.55	0.143093	4.50508
53.58	0.148673	4.50487
53.61	0.154008	4.50474
53.64	0.158989	4.50493
53.67	0.163567	4.50525
53.7	0.167713	4.50563
53.73	0.171414	4.506
53.76	0.174623	4.50624
53.79	0.177369	4.5065
53.82	0.179609	4.5065
53.85	0.181351	4.50671
53.88	0.182627	4.50696
53.91	0.183446	4.50717
53.94	0.183886	4.50716
53.97	0.183947	4.5071
54	0.183664	4.5069
54.03	0.183112	4.507
54.06	0.182255	4.50715
54.09	0.181161	4.50698
54.12	0.179895	4.50669
54.15	0.178421	4.50685
54.18	0.176683	4.50679
54.21	0.174721	4.50651
54.24	0.172561	4.50643
54.27	0.170305	4.50665
54.3	0.16798	4.50676
54.33	0.165555	4.50667
54.36	0.16304	4.50668
54.39	0.160471	4.50679
54.42	0.157861	4.50676
54.45	0.155239	4.50697
54.48	0.152614	4.50741
54.51	0.149926	4.50743
54.54	0.147163	4.50714
54.57	0.144362	4.50683
54.6	0.141554	4.50647
54.63	0.138754	4.5066
54.66	0.136	4.50684
54.69	0.133225	4.507
54.72	0.130465	4.50705
54.75	0.127777	4.507
54.78	0.125138	4.50671
54.81	0.12255	4.5063
54.84	0.119999	4.50635
54.87	0.117477	4.50637
54.9	0.114955	4.50646
54.93	0.112452	4.50667
54.96	0.110006	4.50728
54.99	0.10759	4.50777
55.02	0.105176	4.50754
55.05	0.102777	4.50702
55.08	0.100401	4.50687
55.11	0.0980493	4.50674
55.14	0.095751	4.50669
55.17	0.0934529	4.50657
55.2	0.0911553	4.50677
55.23	0.0888638	4.50677
55.26	0.0865667	4.41976
55.29	0.0842679	4.34188
55.32	0.0819795	4.27186
55.35	0.0797391	4.20743
55.38	0.0774796	4.14673
55.41	0.075231	4.089
55.44	0.0730751	4.0339
55.47	0.0710584	3.98128
55.5	0.0691577	3.93066
55.53	0.0674082	3.88194
55.56	0.0658664	3.83499
55.59	0.0646213	3.7898
55.62	0.0637369	3.7458
55.65	0.0632965	3.7032
55.68	0.0634186	3.66147
55.71	0.064183	3.62048
55.74	0.0656018	3.58046
55.77	0.067733	3.5409
55.8	0.0705648	3.50211
55.83	0.0740714	3.46419
55.86	0.0782566	3.42718
55.89	0.083145	3.39083
55.92	0.0887917	3.35547
55.95	0.0952656	3.32111
55.98	0.102674	3.28773
56.01	0.111042	3.25528
56.04	0.12042	3.22337
56.07	0.130883	3.19187
56.1	0.142487	3.16089
56.13	0.155377	3.13053
56.16	0.16961	3.10094
56.19	0.185177	3.0718
56.22	0.202063	3.04327
56.25	0.22023	3.01549
56.28	0.239703	2.98787
56.31	0.260465	2.96075
56.34	0.282453	2.93415
56.37	0.305611	2.90808
56.4	0.329891	2.88266
56.43	0.355309	2.85791
56.46	0.381837	2.83407
56.49	0.409444	2.81048
56.52	0.438014	2.78694
56.55	0.467414	2.76375
56.58	0.497551	2.74098
56.61	0.528331	2.71904
56.64	0.559679	2.69763
56.67	0.591538	2.67643
56.7	0.623909	2.65561
56.73	0.656854	2.63496
56.76	0.690361	2.61464
56.79	0.724421	2.59512
56.82	0.758998	2.57601
56.85	0.794097	2.5571
56.88	0.829605	2.53845
56.91	0.865469	2.51997
56.94	0.901607	2.50171
56.97	0.937943	2.48359
57	0.974422	2.46583
57.03	1.01091	2.44841
57.06	1.04739	2.43125
57.09	1.08381	2.41448
57.12	1.12015	2.39779
57.15	1.15642	2.38114
57.18	1.19263	2.36473
57.21	1.22881	2.34853
57.24	1.26493	2.33262
57.27	1.30087	2.31688
57.3	1.33679	2.30133
57.33	1.37258	2.28607
57.36	1.40827	2.27109
57.39	1.44391	2.2562
57.42	1.47954	2.24144
57.45	1.51524	2.22308
57.48	1.62131	2.20885
57.51	1.58679	2.1945
57.54	1.62265	2.18002
57.57	1.65862	2.16581
57.6	1.69467	2.15191
57.63	1.73069	2.13797
57.66	1.76653	2.12427
57.69	1.80215	2.11061
57.72	1.83747	2.09731
57.75	1.87236	2.08411
57.78	1.90676	2.071
57.81	1.94056	2.05803
57.84	1.97379	2.04538
57.87	2.00639	2.02946
57.9	2.12075	2.01727
57.93	2.06956	2.00482
57.96	2.10006	1.99266
57.99	2.12985	1.98089
58.02	2.15895	1.96927
58.05	2.18734	1.95768
58.08	2.21503	1.9463
58.11	2.24208	1.93502
58.14	2.26862	1.92405
58.17	2.29485	1.91318
58.2	2.32067	1.9023
58.23	2.34612	1.89154
58.26	2.37113	1.88118
58.29	2.3956	1.87098
58.32	2.41945	1.86069
58.35	2.44267	1.85044
58.38	2.39497	1.84032
58.41	2.48733	1.83042
58.44	2.50871	1.82082
58.47	2.52948	1.81121
58.5	2.5498	1.80172
58.53	2.56963	1.79243
58.56	2.58909	1.78343
58.59	2.6082	1.77458
58.62	2.62694	1.76592
58.65	2.64531	1.75737
58.68	2.66346	1.74876
58.71	2.68154	1.74019
58.74	2.69958	1.73176
58.77	2.71768	1.72361
58.8	2.65346	1.7157
58.83	2.75421	1.70774
58.86	2.77276	1.69961
58.89	2.79154	1.68837
58.92	2.91433	1.68081
58.95	2.82993	1.67304
58.98	2.84954	1.66561
59.01	2.86924	1.65826
59.04	2.88893	1.651
59.07	2.90854	1.64348
59.1	2.92809	1.63597
59.13	2.94756	1.62868
59.16	2.96702	1.62162
59.19	2.98642	1.61463
59.22	3.00589	1.60772
59.25	3.02542	1.60084
59.28	3.04494	1.59404
59.31	3.06439	1.58749
59.34	3.08395	1.58088
59.37	3.10372	1.57423
59.4	3.1236	1.56761
59.43	3.14325	1.56111
59.46	3.16281	1.55464
59.49	3.1826	1.54819
59.52	3.20303	1.5417
59.55	3.22414	1.53538
59.58	3.24578	1.52912
59.61	3.26789	1.52309
59.64	3.29053	1.51728
59.67	3.31348	1.5116
59.7	3.33657	1.506
59.73	3.35976	1.50028
59.76	3.38317	1.49431
59.79	3.40678	1.48803
59.82	3.32686	1.48167
59.85	3.45463	1.47528
59.88	3.47865	1.46889
59.91	3.50251	1.46251
59.94	3.52609	1.45625
[truncated: 239 more rows]
