# Supplementary material for: A coupled mechano-biochemical model for cell polarity guided anisotropic root growth
Source: eLife. 2021 Nov 1;10:e72132. doi: 10.7554/eLife.72132 (PMC8716106; doi:10.7554/eLife.72132)
Supplement: Figure 5—figure supplement 1—source data 1. [file elife-72132-fig5-figsupp1-data1.xlsx]

## Sheet: Figure 5—figure supplement 1A
Relative position along the axis	Growth Rate (1/h)	Auxin Conc. [IAA] non-Vasc	Auxin Conc. [IAA] Vasc
0	0.000961127	0.0826033	0.227803
0.0126582	0.0018251	0.0718426	0.283348
0.0253165	0.0023956	0.0704023	0.273283
0.0379747	0.00277043	0.0691738	0.226452
0.0506329	0.00304737	0.0618627	0.199194
0.0632911	0.00330948	0.0524572	0.231416
0.0759494	0.00358746	0.0472906	0.280934
0.0886076	0.00390038	0.0503135	0.284065
0.101266	0.00425916	0.0587643	0.238422
0.113924	0.00460217	0.0688273	0.192507
0.126582	0.00482966	0.0784755	0.192356
0.139241	0.00488462	0.0870556	0.234252
0.151899	0.00489814	0.0939494	0.280835
0.164557	0.0050472	0.0985385	0.301017
0.177215	0.00530978	0.100295	0.299038
0.189873	0.00541283	0.0989946	0.290402
0.202532	0.00509853	0.0944976	0.29021
0.21519	0.00461465	0.0876791	0.302677
0.227848	0.00457049	0.0808843	0.32023
0.240506	0.00491785	0.0765735	0.335015
0.253165	0.00511808	0.0761838	0.345132
0.265823	0.00481724	0.077393	0.354039
0.278481	0.00441507	0.0770161	0.365205
0.291139	0.00443439	0.0727796	0.380487
0.303797	0.0047365	0.0670196	0.400907
0.316456	0.00476388	0.0635251	0.426442
0.329114	0.00430347	0.0655835	0.452077
0.341772	0.00390239	0.0710705	0.471309
0.35443	0.00403705	0.0745619	0.481688
0.367089	0.00438746	0.0724944	0.490051
0.379747	0.00441486	0.0682458	0.504343
0.392405	0.00404329	0.0667714	0.525874
0.405063	0.00374925	0.0729122	0.547714
0.417722	0.00394997	0.0869328	0.562418
0.43038	0.00440153	0.103071	0.564468
0.443038	0.00460093	0.115247	0.560017
0.455696	0.00455217	0.120366	0.559566
0.468354	0.00465357	0.118852	0.570781
0.481013	0.00493406	0.112293	0.595688
0.493671	0.00508613	0.106925	0.633956
0.506329	0.00494993	0.110391	0.671097
0.518987	0.00502059	0.127337	0.685677
0.531646	0.00558123	0.146968	0.67179
0.544304	0.00599282	0.154751	0.65551
0.556962	0.00557438	0.149474	0.665636
0.56962	0.0047172	0.13811	0.703459
0.582278	0.00443358	0.127674	0.742814
0.594937	0.00473511	0.124721	0.763749
0.607595	0.00476514	0.134335	0.773856
0.620253	0.00402977	0.151264	0.787125
0.632911	0.00325146	0.165475	0.813067
0.64557	0.00315934	0.173222	0.850281
0.658228	0.00337665	0.178884	0.895658
0.670886	0.00322521	0.186122	0.9435
0.683544	0.00265643	0.190558	0.984958
0.696203	0.00219768	0.185796	1.01329
0.708861	0.00215419	0.177674	1.03796
0.721519	0.00234099	0.179407	1.07539
0.734177	0.00254468	0.197645	1.13563
0.746835	0.00270788	0.221702	1.20624
0.759494	0.00282311	0.240613	1.27011
0.772152	0.00288502	0.257872	1.31966
0.78481	0.00290249	0.281224	1.36054
0.797468	0.00289026	0.306854	1.39894
0.810127	0.00286309	0.323462	1.43887
0.822785	0.00283534	0.329227	1.48361
0.835443	0.00282019	0.33203	1.5354
0.848101	0.00283059	0.338686	1.5919
0.860759	0.00287948	0.35326	1.64966
0.873418	0.00296785	0.377768	1.70571
0.886076	0.00306141	0.40646	1.75766
0.898734	0.00311945	0.431671	1.80304
0.911392	0.00310123	0.450277	1.83894
0.924051	0.00296603	0.463216	1.86224
0.936709	0.00267513	0.471848	1.8707
0.949367	0.00224825	0.480579	1.87308
0.962025	0.00177115	0.4957	1.88586
0.974684	0.00133312	0.523529	1.92562
0.987342	0.00102346	0.570383	2.009
1	0.000931464	0.64258	2.15259

## Sheet: Figure 5—figure supplement 1B
Relative position along the axis	Growth Rate (1/h)	Auxin Conc. [IAA] non-Vasc	Auxin Conc. [IAA] Vasc
0	0.00142736	0.308101	0.227199
0.0126582	0.00392329	0.306312	0.152431
0.0253165	0.00586721	0.360324	0.150766
0.0379747	0.00740456	0.408668	0.153726
0.0506329	0.00868081	0.393617	0.154514
0.0632911	0.00984288	0.324623	0.149709
0.0759494	0.0110482	0.267643	0.142489
0.0886076	0.0124589	0.247532	0.137853
0.101266	0.01419	0.242517	0.137772
0.113924	0.015918	0.232184	0.13985
0.126582	0.0171004	0.215494	0.141652
0.139241	0.0175958	0.197721	0.142703
0.151899	0.0176343	0.183915	0.143316
0.164557	0.0174777	0.176097	0.143841
0.177215	0.0174274	0.174151	0.144805
0.189873	0.0176779	0.177638	0.146754
0.202532	0.017893	0.183343	0.149236
0.21519	0.0176558	0.186437	0.150745
0.227848	0.0172069	0.183039	0.150347
0.240506	0.0170961	0.174761	0.149118
0.253165	0.0173715	0.165143	0.148511
0.265823	0.0176316	0.157147	0.149513
0.278481	0.0176505	0.151591	0.152713
0.291139	0.0174803	0.14879	0.157993
0.303797	0.0172582	0.148484	0.163334
0.316456	0.0172438	0.149035	0.16657
0.329114	0.0175219	0.148631	0.167652
0.341772	0.0177686	0.146622	0.167985
0.35443	0.0176839	0.143828	0.168794
0.367089	0.0171563	0.141132	0.170846
0.379747	0.0161678	0.139112	0.174643
0.392405	0.0148485	0.138173	0.179044
0.405063	0.0132863	0.138581	0.18215
0.417722	0.0114327	0.140221	0.183239
0.43038	0.00945536	0.142856	0.183044
0.443038	0.00792961	0.145397	0.182477
0.455696	0.0070184	0.146097	0.18273
0.468354	0.00612186	0.144276	0.184853
0.481013	0.00495552	0.142049	0.187892
0.493671	0.00397077	0.141698	0.189756
0.506329	0.00346534	0.142823	0.190131
0.518987	0.00321918	0.143564	0.19158
0.531646	0.00302687	0.143003	0.196046
0.544304	0.00289642	0.141509	0.200875
0.556962	0.00290915	0.139724	0.202126
0.56962	0.00327974	0.138771	0.200365
0.582278	0.00416896	0.139542	0.200704
0.594937	0.00519545	0.141245	0.20597
0.607595	0.00579421	0.142627	0.212271
0.620253	0.00594869	0.14361	0.215432
0.632911	0.00606381	0.144881	0.217109
0.64557	0.00636344	0.146543	0.221327
0.658228	0.00665378	0.14788	0.228329
0.670886	0.00670753	0.148458	0.233858
0.683544	0.00655381	0.148706	0.235117
0.696203	0.00639062	0.148945	0.234622
0.708861	0.00637667	0.148544	0.235633
0.721519	0.00641468	0.147092	0.238611
0.734177	0.00631143	0.146211	0.242398
0.746835	0.00588624	0.147563	0.246035
0.759494	0.00515767	0.149414	0.249021
0.772152	0.00430271	0.148924	0.250925
0.78481	0.00350276	0.146324	0.251721
0.797468	0.00292164	0.144111	0.252016
0.810127	0.00257223	0.143977	0.252475
0.822785	0.0023905	0.145155	0.25366
0.835443	0.00231175	0.146443	0.255527
0.848101	0.00227135	0.146952	0.257795
0.860759	0.002208	0.146695	0.260184
0.873418	0.00210307	0.145847	0.262413
0.886076	0.00196693	0.144582	0.264312
0.898734	0.00181049	0.142948	0.266019
0.911392	0.00164467	0.140737	0.267724
0.924051	0.0014804	0.137713	0.269618
0.936709	0.00132861	0.133638	0.271892
0.949367	0.00120021	0.128275	0.274738
0.962025	0.00110613	0.121387	0.278345
0.974684	0.00105728	0.112737	0.282905
0.987342	0.0010646	0.102087	0.288609
1	0.001139	0.0891998	0.295647

## Sheet: Figure 5—figure supplement 1C
Relative position along the axis	Growth Rate (1/h)	Auxin Conc. [IAA] non-Vasc	Auxin Conc. [IAA] Vasc
0	0.00510805	0.123996	4.07417
0.0126582	0.00319681	0.341471	3.19221
0.0253165	0.00373195	0.345454	2.45477
0.0379747	0.00595641	0.256175	1.35463
0.0506329	0.00911316	0.176609	0.382382
0.0632911	0.0124451	0.155927	0.109318
0.0759494	0.0152499	0.214415	0.365031
0.0886076	0.0174394	0.288439	0.573831
0.101266	0.0193127	0.311392	0.484631
0.113924	0.0211579	0.291267	0.294177
0.126582	0.0232216	0.252695	0.217624
0.139241	0.0256604	0.220292	0.283647
0.151899	0.0280433	0.209846	0.386015
0.164557	0.0297082	0.213084	0.423774
0.177215	0.0304065	0.217669	0.391718
0.189873	0.0302602	0.213575	0.34612
0.202532	0.0295707	0.202301	0.3337
0.21519	0.0289866	0.188941	0.348759
0.227848	0.0290458	0.17851	0.36938
0.240506	0.0294557	0.17355	0.376834
0.253165	0.0296678	0.173729	0.370603
0.265823	0.0294351	0.178529	0.356646
0.278481	0.0287418	0.185887	0.344504
0.291139	0.0277867	0.191273	0.350009
0.303797	0.0269449	0.190102	0.386873
0.316456	0.0264021	0.182827	0.434478
0.329114	0.0260709	0.175763	0.449251
0.341772	0.0258029	0.174913	0.418355
0.35443	0.0253724	0.179577	0.386102
0.367089	0.0245593	0.185054	0.40137
0.379747	0.0231775	0.187468	0.466176
0.392405	0.0213283	0.185983	0.528377
0.405063	0.0199273	0.180418	0.543691
0.417722	0.0196177	0.171905	0.522798
0.43038	0.0198204	0.165215	0.493383
0.443038	0.0199346	0.165543	0.474324
0.455696	0.0199867	0.172028	0.474758
0.468354	0.0201289	0.1769	0.500315
0.481013	0.020523	0.175461	0.53352
0.493671	0.0211121	0.172716	0.546761
0.506329	0.0212447	0.174934	0.532926
0.518987	0.0205053	0.182052	0.510551
0.531646	0.0193166	0.189157	0.49622
0.544304	0.0180486	0.19319	0.486429
0.556962	0.0166484	0.195816	0.471194
0.56962	0.0151491	0.199248	0.454436
0.582278	0.0139293	0.204253	0.454699
0.594937	0.0131499	0.210689	0.485049
0.607595	0.0122901	0.21818	0.525854
0.620253	0.0109432	0.225863	0.546913
0.632911	0.00945426	0.232962	0.538185
0.64557	0.00826268	0.239877	0.526684
0.658228	0.00738335	0.247558	0.538036
0.670886	0.00666401	0.256151	0.562358
0.683544	0.00602062	0.264584	0.575643
0.696203	0.00544596	0.271758	0.569469
0.708861	0.00493536	0.276882	0.558119
0.721519	0.00447718	0.279517	0.553379
0.734177	0.00405776	0.281124	0.548332
0.746835	0.00366656	0.283789	0.531556
0.759494	0.00330371	0.287477	0.509768
0.772152	0.00297165	0.290847	0.510738
0.78481	0.00267297	0.293934	0.556596
0.797468	0.0024129	0.297919	0.633231
0.810127	0.00219858	0.303139	0.714633
0.822785	0.00203719	0.308912	0.779056
0.835443	0.00193593	0.314086	0.810844
0.848101	0.00190001	0.316456	0.795023
0.860759	0.00191966	0.31375	0.734436
0.873418	0.00197827	0.305982	0.66267
0.886076	0.0020592	0.295439	0.616356
0.898734	0.00214581	0.284507	0.631116
0.911392	0.00222147	0.274854	0.7115
0.924051	0.00226954	0.266244	0.825925
0.936709	0.00227337	0.258126	0.940773
0.949367	0.00221632	0.249947	1.02242
0.962025	0.00208176	0.241156	1.03726
0.974684	0.00185304	0.231203	0.951668
0.987342	0.00151354	0.219536	0.732025
1	0.00104659	0.205604	0.344713
