# Supplementary material for: A coupled mechano-biochemical model for cell polarity guided anisotropic root growth
Source: eLife. 2021 Nov 1;10:e72132. doi: 10.7554/eLife.72132 (PMC8716106; doi:10.7554/eLife.72132)
Supplement: Figure 5—source data 1. [file elife-72132-fig5-data1.xlsx]

## Sheet: Figure 5A
Relative position along the axis	Growth Rate (1/h)	Auxin Conc. [IAA] non-Vasc	Auxin Conc. [IAA] Vasc
0	0.0133305	1.39042	0.597603
0.0126582	0.0118023	0.971399	0.400265
0.0253165	0.0128704	1.17459	0.346704
0.0379747	0.0159991	1.50207	0.383239
0.0506329	0.0206527	1.48592	0.43051
0.0632911	0.0262957	1.13597	0.430465
0.0759494	0.032369	0.823429	0.405975
0.0886076	0.0378978	0.664336	0.396508
0.101266	0.0415495	0.594973	0.40838
0.113924	0.0424144	0.560996	0.421399
0.126582	0.0419706	0.541789	0.420683
0.139241	0.0422393	0.522246	0.415137
0.151899	0.0431458	0.490122	0.419397
0.164557	0.0436666	0.451364	0.436681
0.177215	0.0434804	0.419044	0.449263
0.189873	0.0431096	0.40272	0.441016
0.202532	0.0427517	0.398946	0.421139
0.21519	0.0419319	0.401292	0.4086
0.227848	0.0403518	0.404391	0.409603
0.240506	0.0385026	0.404906	0.416706
0.253165	0.0369095	0.399847	0.423229
0.265823	0.0356364	0.390055	0.428958
0.278481	0.0346206	0.380838	0.435378
0.291139	0.0337259	0.377294	0.441445
0.303797	0.0327728	0.378416	0.443892
0.316456	0.0314624	0.378873	0.441613
0.329114	0.0295637	0.374476	0.440429
0.341772	0.0273542	0.366975	0.44666
0.35443	0.0251883	0.359872	0.45879
0.367089	0.0230685	0.355218	0.471041
0.379747	0.0210011	0.352703	0.479405
0.392405	0.0193643	0.351842	0.482446
0.405063	0.0182229	0.352515	0.47971
0.417722	0.0167254	0.354791	0.472716
0.43038	0.0146527	0.358141	0.463437
0.443038	0.0130037	0.360995	0.454809
0.455696	0.0121046	0.361734	0.44998
0.468354	0.0114203	0.359084	0.448781
0.481013	0.0105423	0.352067	0.447944
0.493671	0.0092427	0.342875	0.445627
0.506329	0.00779588	0.336361	0.44337
0.518987	0.00670106	0.334377	0.442967
0.531646	0.00594476	0.333194	0.444282
0.544304	0.00529719	0.329622	0.446097
0.556962	0.00475853	0.324837	0.447055
0.56962	0.00440138	0.320917	0.445604
0.582278	0.00411205	0.318604	0.440798
0.594937	0.00374067	0.317937	0.434512
0.607595	0.00350331	0.317389	0.429204
0.620253	0.00379546	0.313837	0.424882
0.632911	0.00457435	0.306755	0.419946
0.64557	0.00534799	0.300337	0.413026
0.658228	0.00572931	0.296839	0.403099
0.670886	0.00578586	0.292179	0.390385
0.683544	0.00568764	0.283522	0.37914
0.696203	0.00553858	0.275787	0.373858
0.708861	0.00532371	0.273503	0.373435
0.721519	0.00501576	0.273574	0.373723
0.734177	0.00460729	0.272088	0.371795
0.746835	0.00413119	0.26939	0.368088
0.759494	0.00362528	0.266892	0.363598
0.772152	0.00312658	0.264784	0.358974
0.78481	0.00265788	0.262563	0.354049
0.797468	0.00222945	0.259915	0.348537
0.810127	0.00185115	0.257186	0.342182
0.822785	0.00153282	0.254854	0.33515
0.835443	0.00128319	0.253214	0.327903
0.848101	0.00109858	0.251501	0.320908
0.860759	0.000967829	0.248566	0.314635
0.873418	0.000879652	0.243261	0.309442
0.886076	0.000822767	0.234741	0.305224
0.898734	0.000785895	0.223904	0.301756
0.911392	0.000757753	0.212271	0.298811
0.924051	0.00072706	0.201362	0.296162
0.936709	0.000682536	0.1927	0.293582
0.949367	0.000612899	0.187805	0.290845
0.962025	0.000506867	0.188199	0.287725
0.974684	0.00035316	0.195402	0.283995
0.987342	0.000140497	0.210937	0.279428
1	-0.000142404	0.236324	0.273798

## Sheet: Figure 5B
Relative position along the axis	Growth Rate (1/h)	Auxin Conc. [IAA] non-Vasc	Auxin Conc. [IAA] Vasc
0	0.0101872	0.582643	0.451342
0.0126582	0.0106804	0.6914	0.216685
0.0253165	0.0129536	0.889307	0.224702
0.0379747	0.0165194	1.07581	0.240112
0.0506329	0.0208907	1.15566	0.251312
0.0632911	0.02558	1.14226	0.253576
0.0759494	0.0302111	1.14994	0.249101
0.0886076	0.0348224	1.21828	0.242203
0.101266	0.0395376	1.2563	0.2362
0.113924	0.0439099	1.17147	0.232894
0.126582	0.0466846	0.98582	0.233732
0.139241	0.0473357	0.790574	0.238189
0.151899	0.0466387	0.67574	0.244732
0.164557	0.045426	0.660797	0.251777
0.177215	0.0441678	0.681432	0.257251
0.189873	0.0431566	0.670193	0.258799
0.202532	0.0422171	0.610226	0.255834
0.21519	0.0409391	0.541993	0.251201
0.227848	0.039214	0.506723	0.24786
0.240506	0.0372082	0.50775	0.246283
0.253165	0.0351855	0.517524	0.245622
0.265823	0.0334892	0.510409	0.245676
0.278481	0.0322897	0.486678	0.247543
0.291139	0.0315599	0.460548	0.252197
0.303797	0.0308119	0.444247	0.257856
0.316456	0.0290853	0.435506	0.261155
0.329114	0.0264459	0.426004	0.260545
0.341772	0.0241626	0.409157	0.258981
0.35443	0.0224398	0.386786	0.259761
0.367089	0.0202802	0.363212	0.262628
0.379747	0.0179174	0.342076	0.265205
0.392405	0.0167012	0.325671	0.2663
0.405063	0.0161924	0.315913	0.26786
0.417722	0.0149464	0.311071	0.271873
0.43038	0.0130831	0.306337	0.275649
0.443038	0.0113422	0.298372	0.273909
0.455696	0.0100544	0.291712	0.266485
0.468354	0.00928939	0.293119	0.260162
0.481013	0.00871147	0.30162	0.260021
0.493671	0.00800904	0.307093	0.262413
0.506329	0.00705513	0.302518	0.26185
0.518987	0.0059709	0.295453	0.258363
0.531646	0.00521742	0.296063	0.256657
0.544304	0.00491561	0.303102	0.259286
0.556962	0.00469139	0.3085	0.26339
0.56962	0.00447828	0.309583	0.2657
0.582278	0.004672	0.311354	0.26579
0.594937	0.00541431	0.31712	0.26457
0.607595	0.00631544	0.32415	0.263385
0.620253	0.00697937	0.329263	0.264075
0.632911	0.00722532	0.332719	0.267793
0.64557	0.00693868	0.336044	0.273216
0.658228	0.00620273	0.339279	0.278522
0.670886	0.0052845	0.341198	0.282245
0.683544	0.00443555	0.342258	0.283158
0.696203	0.00371684	0.34511	0.281275
0.708861	0.00309312	0.349972	0.278497
0.721519	0.00253166	0.352693	0.27646
0.734177	0.00203146	0.352585	0.275223
0.746835	0.0016095	0.356376	0.274488
0.759494	0.00128296	0.367031	0.274187
0.772152	0.00106251	0.377729	0.274406
0.78481	0.000929714	0.383651	0.27515
0.797468	0.000857974	0.388852	0.275912
0.810127	0.000820708	0.398255	0.275992
0.822785	0.000791331	0.411367	0.274724
0.835443	0.000749128	0.424946	0.272248
0.848101	0.000693573	0.436325	0.269517
0.860759	0.000628478	0.445788	0.267521
0.873418	0.000557652	0.454524	0.26725
0.886076	0.000484906	0.463722	0.269436
0.898734	0.000414052	0.474455	0.273447
0.911392	0.000348899	0.487462	0.278205
0.924051	0.000293258	0.503425	0.282627
0.936709	0.00025094	0.523023	0.285635
0.949367	0.000225755	0.546938	0.286148
0.962025	0.000221515	0.57585	0.283085
0.974684	0.00024203	0.61044	0.275367
0.987342	0.000291109	0.651388	0.261912
1	0.000372565	0.699375	0.241641

## Sheet: Figure 5C
Relative position along the axis	Growth Rate (1/h)	Auxin Conc. [IAA] non-Vasc	Auxin Conc. [IAA] Vasc
0	0.0140319	1.84368	0.451792
0.0126582	0.00405847	3.5453	0.32403
0.0253165	0.00499683	3.84504	0.291761
0.0379747	0.0127872	3.26582	0.30423
0.0506329	0.0233696	2.33054	0.324548
0.0632911	0.0326844	1.48022	0.327537
0.0759494	0.0378182	0.82564	0.31919
0.0886076	0.0398418	0.394288	0.310294
0.101266	0.0406906	0.208144	0.305586
0.113924	0.0420844	0.218886	0.305246
0.126582	0.0437038	0.329715	0.309172
0.139241	0.0441596	0.442867	0.315863
0.151899	0.0433156	0.465734	0.323136
0.164557	0.0423396	0.394664	0.328603
0.177215	0.0418602	0.301129	0.329152
0.189873	0.0411614	0.256041	0.322001
0.202532	0.0395539	0.272354	0.311048
0.21519	0.0374742	0.309717	0.304943
0.227848	0.0356548	0.326535	0.307751
0.240506	0.034085	0.308671	0.314791
0.253165	0.032381	0.276875	0.320856
0.265823	0.0306548	0.254131	0.324656
0.278481	0.0293977	0.253712	0.327002
0.291139	0.0285323	0.264548	0.329027
0.303797	0.0273417	0.271813	0.332455
0.316456	0.0256155	0.264988	0.338422
0.329114	0.0238229	0.251039	0.343538
0.341772	0.0222948	0.241376	0.342667
0.35443	0.0211169	0.243055	0.337168
0.367089	0.0202544	0.249196	0.337209
0.379747	0.0195619	0.250195	0.350297
0.392405	0.0188582	0.242572	0.366446
0.405063	0.0179748	0.233889	0.370811
0.417722	0.0170383	0.232544	0.362734
0.43038	0.0161946	0.238944	0.352515
0.443038	0.0150614	0.245084	0.34717
0.455696	0.013413	0.243903	0.346394
0.468354	0.0117323	0.237527	0.34891
0.481013	0.0103006	0.231875	0.352887
0.493671	0.00901983	0.22957	0.35625
0.506329	0.00787049	0.228056	0.35748
0.518987	0.00690809	0.225342	0.355855
0.531646	0.00616542	0.223544	0.351356
0.544304	0.00564118	0.225324	0.346392
0.556962	0.00519424	0.229431	0.343734
0.56962	0.00467792	0.232844	0.342738
0.582278	0.00423152	0.233237	0.33999
0.594937	0.00405752	0.2289	0.3343
0.607595	0.00405184	0.221665	0.330423
0.620253	0.00397103	0.215955	0.332847
0.632911	0.00376234	0.212775	0.337959
0.64557	0.00357831	0.210328	0.339031
0.658228	0.00354211	0.208731	0.334223
0.670886	0.00357775	0.208601	0.326888
0.683544	0.00354665	0.205172	0.319997
0.696203	0.00338329	0.195366	0.314963
0.708861	0.00321221	0.18904	0.312714
0.721519	0.00318849	0.190317	0.312629
0.734177	0.00340649	0.190055	0.313502
0.746835	0.00374824	0.187523	0.314155
0.759494	0.00404938	0.18858	0.313446
0.772152	0.00414781	0.192485	0.310368
0.78481	0.00400545	0.195296	0.305365
0.797468	0.00376997	0.196183	0.299792
0.810127	0.0036043	0.196179	0.295012
0.822785	0.00367136	0.195945	0.291797
0.835443	0.00413007	0.195621	0.289924
0.848101	0.00500403	0.195305	0.289074
0.860759	0.00615167	0.195018	0.288929
0.873418	0.00742141	0.194728	0.289176
0.886076	0.00866166	0.194404	0.289544
0.898734	0.00972082	0.194054	0.289783
0.911392	0.0104473	0.193875	0.28964
0.924051	0.0106896	0.194121	0.288865
0.936709	0.010296	0.195043	0.287207
0.949367	0.00911497	0.196894	0.284415
0.962025	0.00699494	0.199927	0.280237
0.974684	0.00378431	0.204395	0.274423
0.987342	-0.000668505	0.210549	0.266721
1	-0.00651509	0.218643	0.256881

## Sheet: Figure 5D
Relative position along the axis	Growth Rate (1/h)	Auxin Conc. [IAA] non-Vasc	Auxin Conc. [IAA] Vasc
0	0.0320147	0.626401	4.91928
0.0126582	0.0347221	0.262512	1.90858
0.0253165	0.0362824	0.102972	0.827421
0.0379747	0.0368713	0.076532	0.677376
0.0506329	0.0366642	0.111941	0.648329
0.0632911	0.0358364	0.140815	0.616953
0.0759494	0.0345635	0.140925	0.597396
0.0886076	0.0330209	0.127323	0.585097
0.101266	0.0313841	0.114053	0.574765
0.113924	0.0298284	0.104541	0.563599
0.126582	0.0285303	0.0988263	0.553634
0.139241	0.0277185	0.0968051	0.547388
0.151899	0.0277023	0.0973391	0.544859
0.164557	0.0283577	0.098814	0.542924
0.177215	0.0285717	0.0998212	0.53922
0.189873	0.0274291	0.100361	0.537293
0.202532	0.0256437	0.101022	0.542813
0.21519	0.024314	0.102236	0.554517
0.227848	0.0236534	0.103425	0.561061
0.240506	0.0234463	0.103598	0.552462
0.253165	0.0232658	0.102092	0.535666
0.265823	0.022536	0.100042	0.525632
0.278481	0.021363	0.0992119	0.532689
0.291139	0.0207811	0.100666	0.547304
0.303797	0.02104	0.102483	0.554728
0.316456	0.0208118	0.101962	0.547944
0.329114	0.0193964	0.0983217	0.534714
0.341772	0.0177253	0.0943712	0.524091
0.35443	0.0164388	0.0931486	0.520259
0.367089	0.0152303	0.0950394	0.524002
0.379747	0.0139092	0.0982972	0.533613
0.392405	0.0127444	0.101277	0.538799
0.405063	0.0119522	0.10336	0.527971
0.417722	0.0115866	0.104339	0.506394
0.43038	0.0115924	0.104289	0.497921
0.443038	0.0117708	0.103768	0.515975
0.455696	0.0120164	0.1033	0.537709
0.468354	0.012355	0.102801	0.535411
0.481013	0.0125105	0.101909	0.512228
0.493671	0.0119815	0.100684	0.49292
0.506329	0.0110238	0.0997559	0.488384
0.518987	0.0104282	0.0996315	0.485603
0.531646	0.0101332	0.100289	0.47474
0.544304	0.00944208	0.101459	0.471819
0.556962	0.00838792	0.102	0.497586
0.56962	0.00765319	0.10056	0.532526
0.582278	0.0073238	0.0978863	0.528541
0.594937	0.00681423	0.096436	0.47949
0.607595	0.00597779	0.097284	0.448709
0.620253	0.00529824	0.0995763	0.481935
0.632911	0.00499562	0.102306	0.5354
0.64557	0.00473598	0.104419	0.54644
0.658228	0.00425147	0.105396	0.508148
0.670886	0.00380981	0.107211	0.475887
0.683544	0.00376826	0.112021	0.485912
0.696203	0.00400653	0.116802	0.509444
0.708861	0.00416038	0.116027	0.509709
0.721519	0.00403187	0.112574	0.500765
0.734177	0.00376355	0.117323	0.533262
0.746835	0.00353031	0.130313	0.635452
0.759494	0.00337206	0.136089	0.759272
0.772152	0.00322238	0.127055	0.844332
0.78481	0.00301714	0.11487	0.875992
0.797468	0.00275598	0.10993	0.872744
0.810127	0.00248146	0.11054	0.853135
0.822785	0.00223694	0.112763	0.83206
0.835443	0.00206022	0.114805	0.823202
0.848101	0.00195158	0.116185	0.839431
0.860759	0.00189586	0.116609	0.881416
0.873418	0.00187786	0.116537	0.94038
0.886076	0.0018824	0.116645	1.0073
0.898734	0.00189469	0.117588	1.07377
0.911392	0.00190516	0.119367	1.14571
0.924051	0.00190777	0.121164	1.24345
0.936709	0.00189654	0.122109	1.38794
0.949367	0.0018655	0.121334	1.60013
0.962025	0.00180867	0.117967	1.90098
0.974684	0.00172007	0.111141	2.31144
0.987342	0.00159373	0.0999836	2.85247
1	0.00142367	0.083627	3.54501

## Sheet: Figure 5E
Relative position along the axis	Growth Rate (1/h)	Auxin Conc. [IAA] non-Vasc	Auxin Conc. [IAA] Vasc
0	0.00207183	0.181896	0.615016
0.0126582	0.00212746	0.468077	0.288255
0.0253165	0.0030771	0.640291	0.271252
0.0379747	0.00481531	0.726808	0.31597
0.0506329	0.00723666	0.755896	0.31603
0.0632911	0.0102357	0.755826	0.29358
0.0759494	0.0137071	0.743463	0.274362
0.0886076	0.0175453	0.692596	0.266324
0.101266	0.021554	0.569894	0.262679
0.113924	0.0249095	0.405498	0.256334
0.126582	0.0265357	0.289349	0.245504
0.139241	0.0262945	0.269393	0.235252
0.151899	0.0256481	0.294419	0.231083
0.164557	0.0260845	0.300188	0.235424
0.177215	0.0274248	0.259323	0.243653
0.189873	0.0284338	0.209238	0.250316
0.202532	0.0289888	0.190654	0.253049
0.21519	0.0296816	0.201355	0.252471
0.227848	0.0303814	0.208987	0.249501
0.240506	0.0298723	0.19637	0.246127
0.253165	0.0277514	0.178006	0.244729
0.265823	0.0259662	0.171415	0.247422
0.278481	0.0260346	0.179457	0.252997
0.291139	0.0266299	0.191833	0.257988
0.303797	0.0262326	0.198934	0.259021
0.316456	0.0251283	0.200231	0.25813
0.329114	0.024024	0.199472	0.264505
0.341772	0.0234169	0.199628	0.286033
0.35443	0.0235327	0.200812	0.308467
0.367089	0.0236624	0.202495	0.303013
0.379747	0.0231666	0.204095	0.266239
0.392405	0.0224837	0.204855	0.236955
0.405063	0.0219719	0.204001	0.247505
0.417722	0.0212541	0.201725	0.270399
0.43038	0.0203309	0.199715	0.260886
0.443038	0.0200471	0.199753	0.231967
0.455696	0.0203004	0.203195	0.237882
0.468354	0.0198249	0.211133	0.28365
0.481013	0.0190264	0.223471	0.316464
0.493671	0.0193413	0.237239	0.317341
0.506329	0.020068	0.249213	0.31294
0.518987	0.0198211	0.257408	0.319085
0.531646	0.0189004	0.260359	0.321632
0.544304	0.0180798	0.255425	0.307546
0.556962	0.0181385	0.238529	0.291178
0.56962	0.0188412	0.210019	0.294903
0.582278	0.0183836	0.184031	0.315867
0.594937	0.0169701	0.17548	0.326549
0.607595	0.0173077	0.181357	0.316394
0.620253	0.0189871	0.188626	0.310431
0.632911	0.0185931	0.189964	0.331251
0.64557	0.0160616	0.187891	0.362225
0.658228	0.0143042	0.185019	0.373463
0.670886	0.0143732	0.180185	0.361731
0.683544	0.0150137	0.171592	0.35069
0.696203	0.0152761	0.163902	0.359631
0.708861	0.0152115	0.166934	0.384167
0.721519	0.0150074	0.184988	0.414057
0.734177	0.0147424	0.211129	0.447209
0.746835	0.0143403	0.240276	0.488519
0.759494	0.0137131	0.283187	0.537762
0.772152	0.0127914	0.354291	0.577865
0.78481	0.0116275	0.441187	0.589068
0.797468	0.010324	0.5059	0.568988
0.810127	0.00898349	0.520243	0.5344
0.822785	0.00770861	0.489244	0.502098
0.835443	0.00659901	0.424905	0.478442
0.848101	0.00569054	0.34978	0.46342
0.860759	0.00495805	0.295371	0.456409
0.873418	0.00437392	0.285576	0.453751
0.886076	0.00391055	0.303658	0.450693
0.898734	0.00354033	0.319831	0.44248
0.911392	0.00323566	0.307107	0.425589
0.924051	0.00296894	0.265537	0.402614
0.936709	0.00271255	0.21029	0.378051
0.949367	0.0024389	0.156704	0.356395
0.962025	0.00212037	0.120115	0.342142
0.974684	0.00172937	0.11586	0.339787
0.987342	0.00123828	0.159275	0.353826
1	0.000619503	0.265696	0.388754
