# Supplementary material for: A coupled mechano-biochemical model for cell polarity guided anisotropic root growth
Source: eLife journal article supplement (doi:10.7554/elife.72132), 2021-11-01

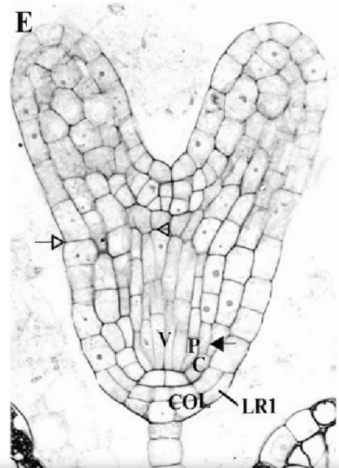

**Segmentation**

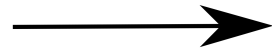

|                          |
|--------------------------|
| Load the picture         |
| Cut the picture surface  |
| Create the Mesh          |
| Subdivide the Mesh       |
| Project the signal       |
| Segment the Stack        |
| Polygonize the triangles |
| Smooth and rescale       |

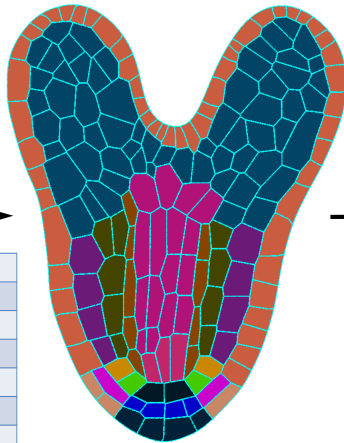

**Triangulation**

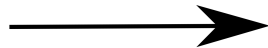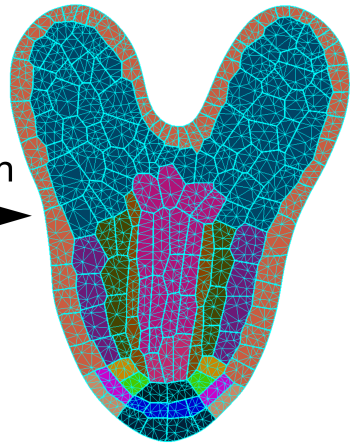

Supplement: supp [file elife-72132-supp-v1.zip]
