# Supplementary figures and images for: A coupled mechano-biochemical model for cell polarity guided anisotropic root growth
Source: eLife journal article supplement (doi:10.7554/elife.72132), 2021-11-01

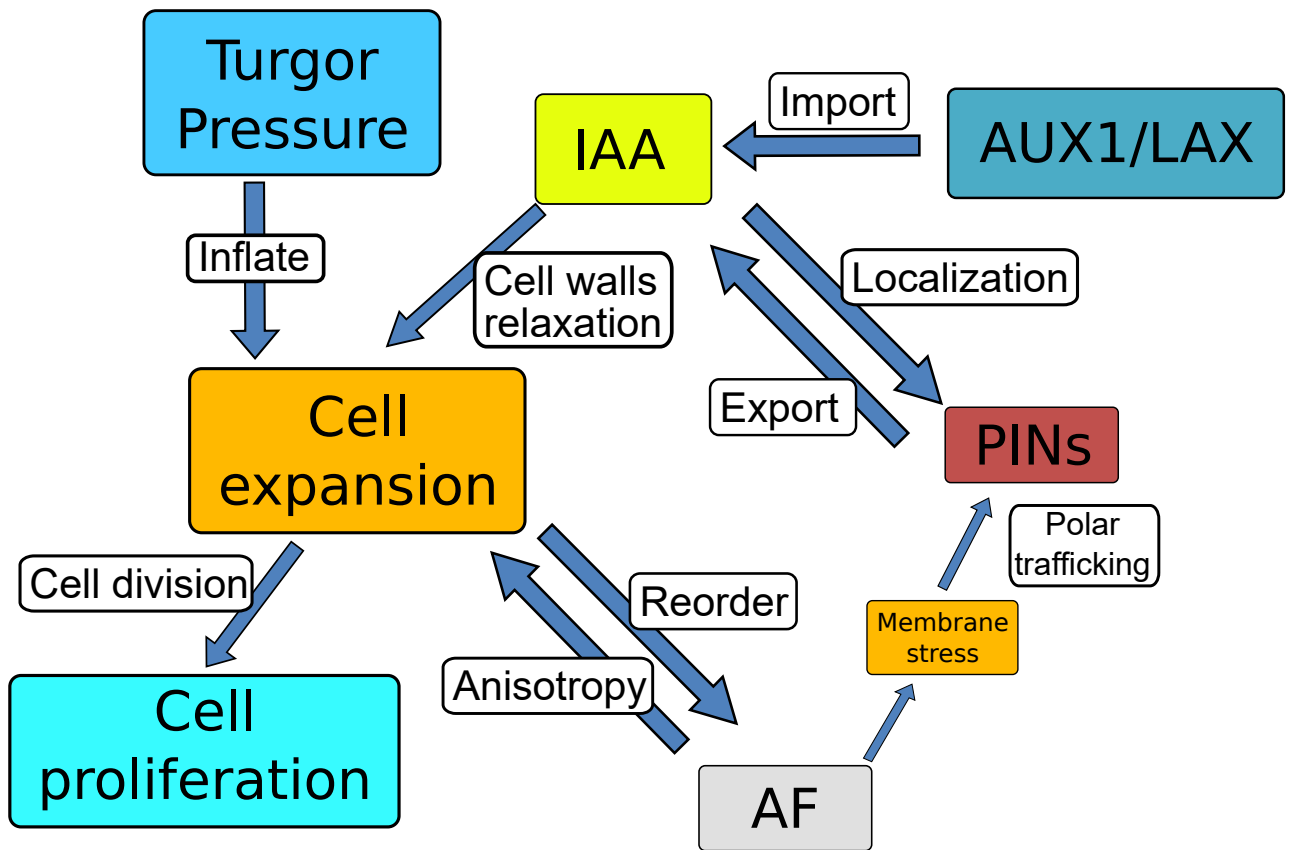

Supplement: supp [file elife-72132-supp-v1.zip]

A

fast growing RSI

root-shoot interface

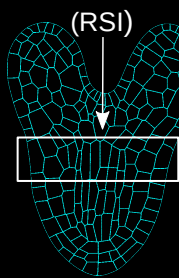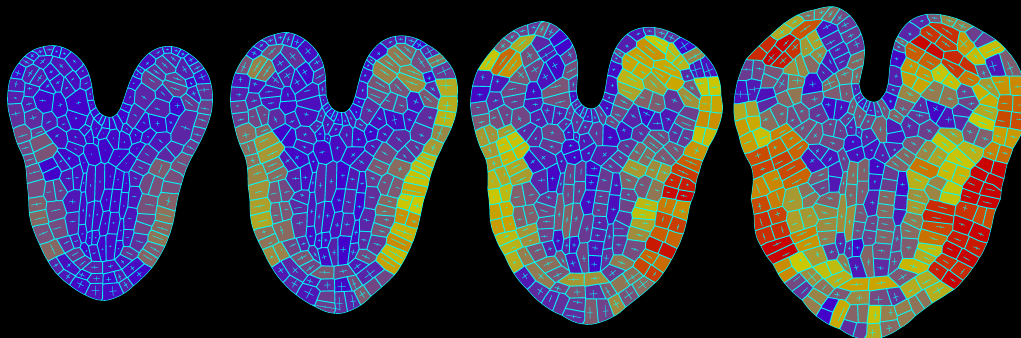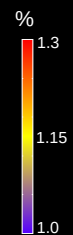

B

slow growing RSI

root-shoot interface

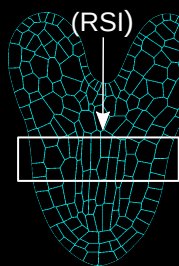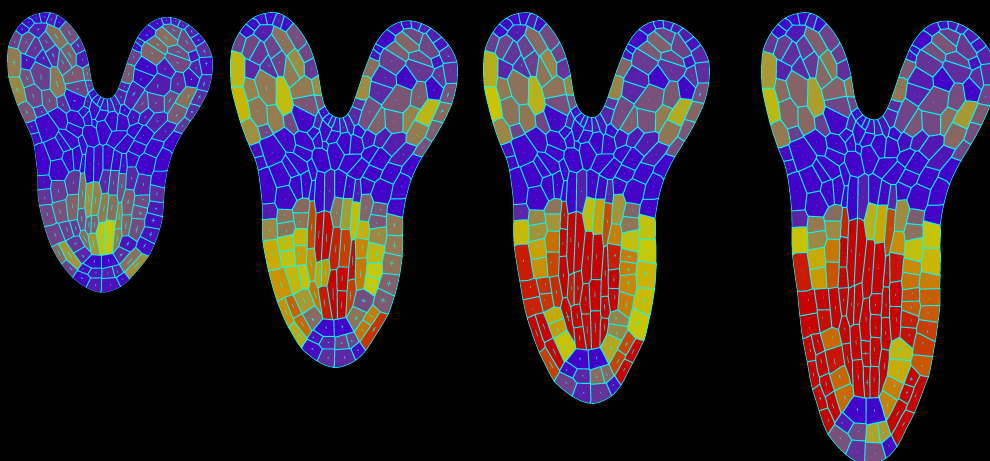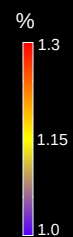

Supplement: supp [file elife-72132-supp-v1.zip]

A

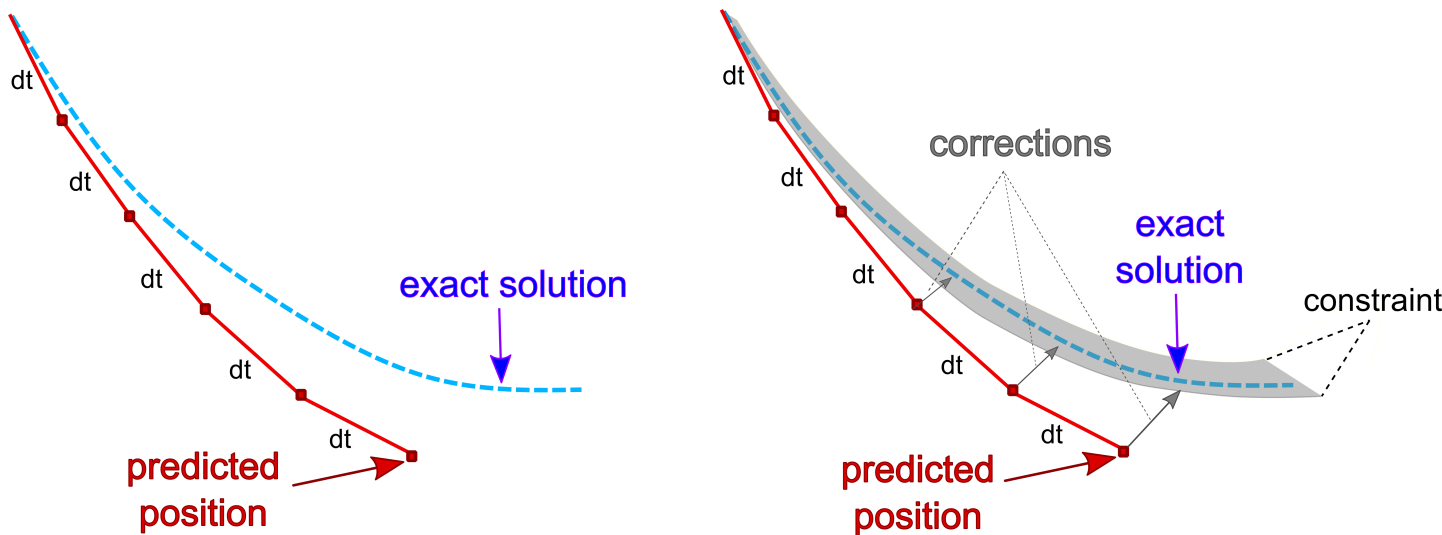

B

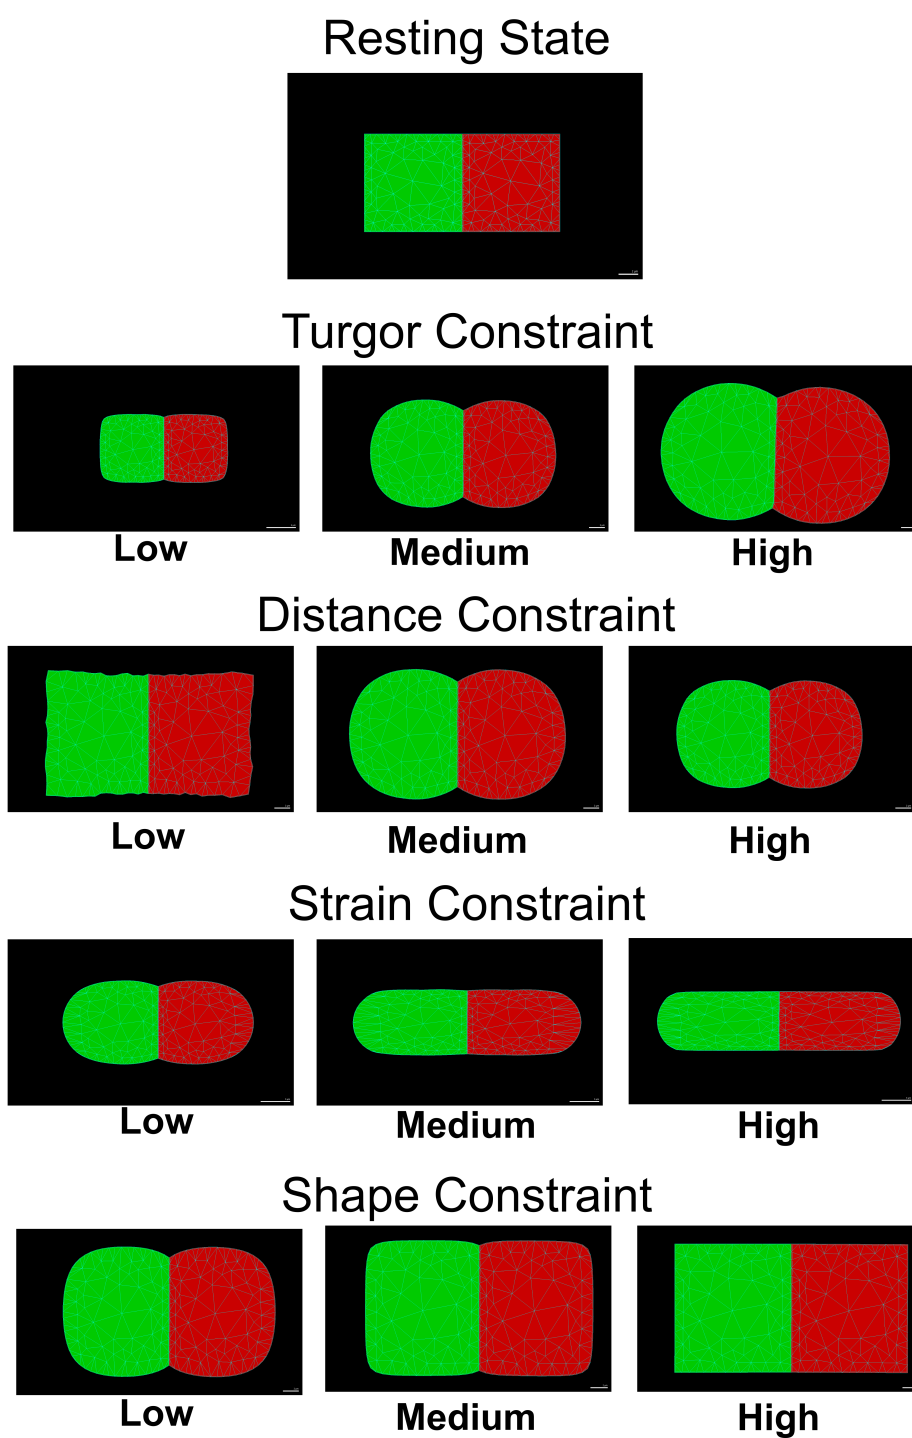

Supplement: supp [file elife-72132-supp-v1.zip]

**A**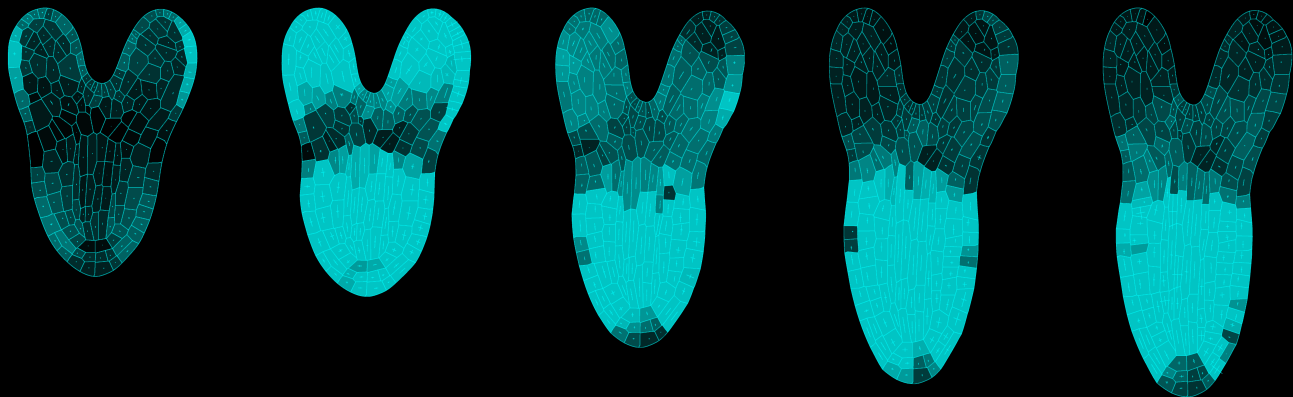**B**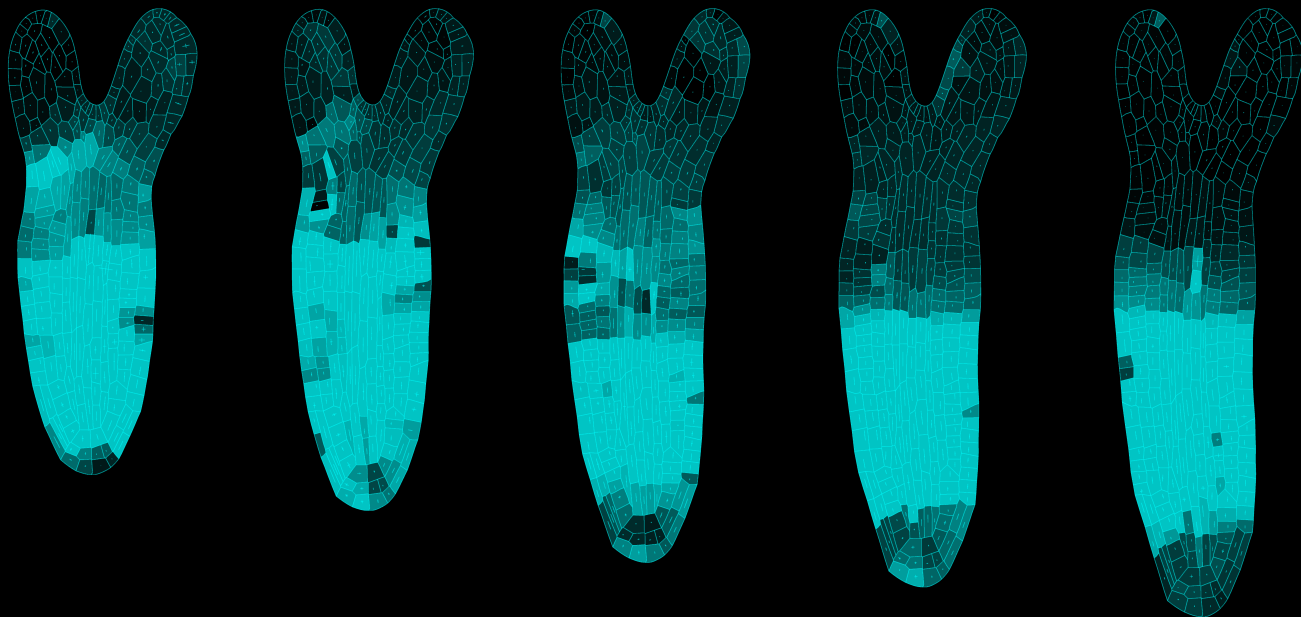

Supplement: supp [file elife-72132-supp-v1.zip]

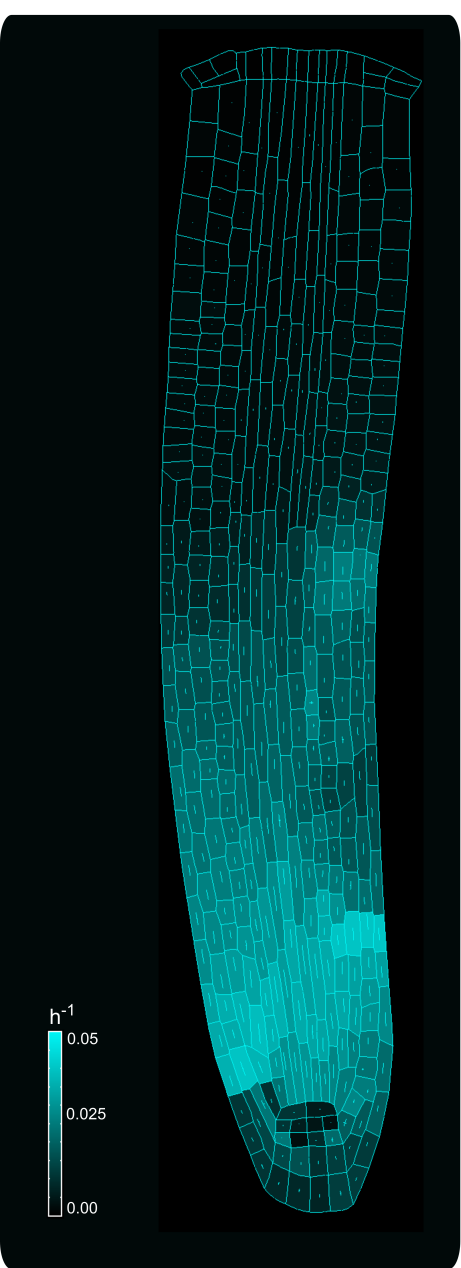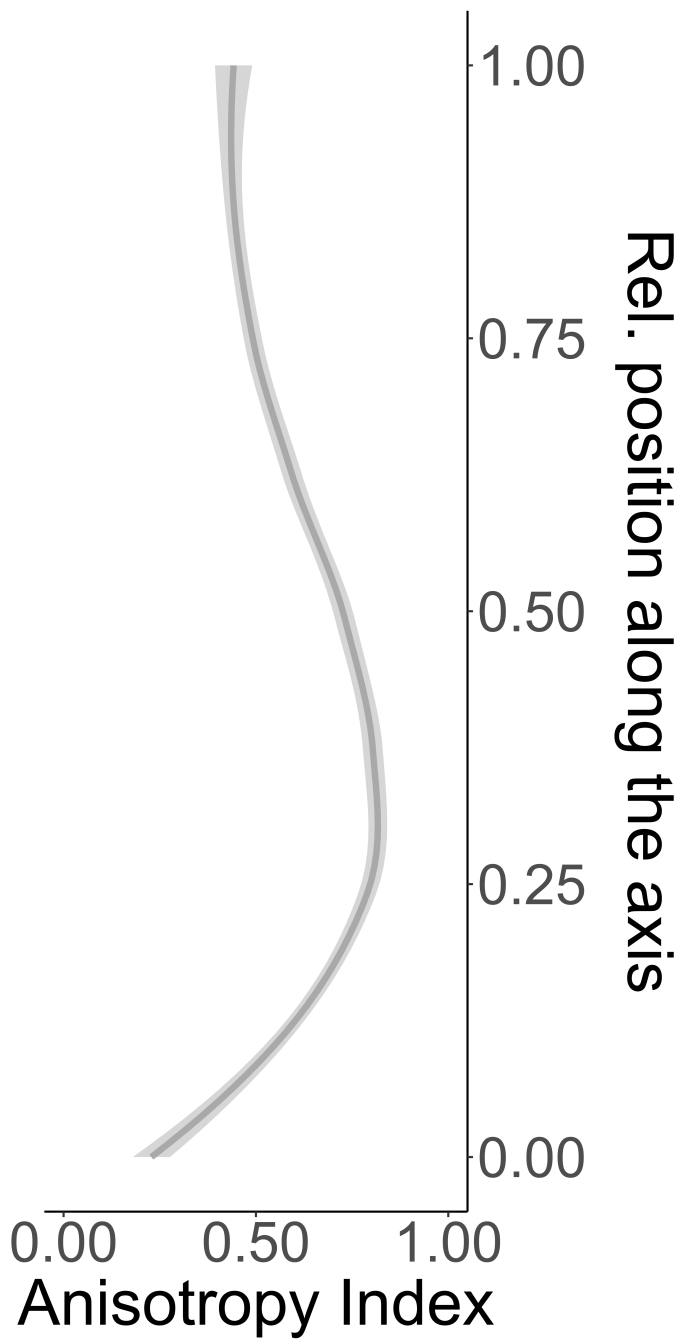

Supplement: supp [file elife-72132-supp-v1.zip]

A

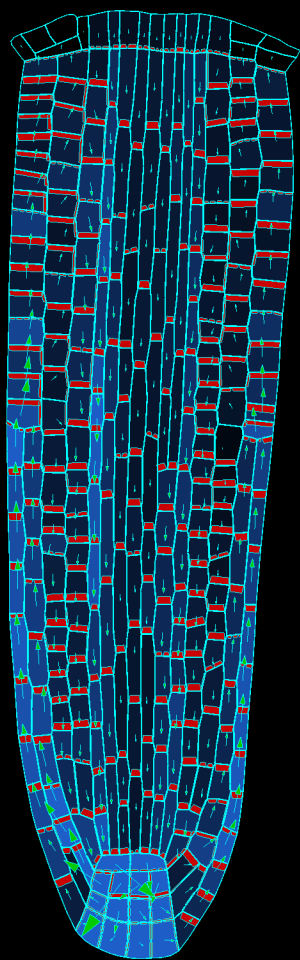

B

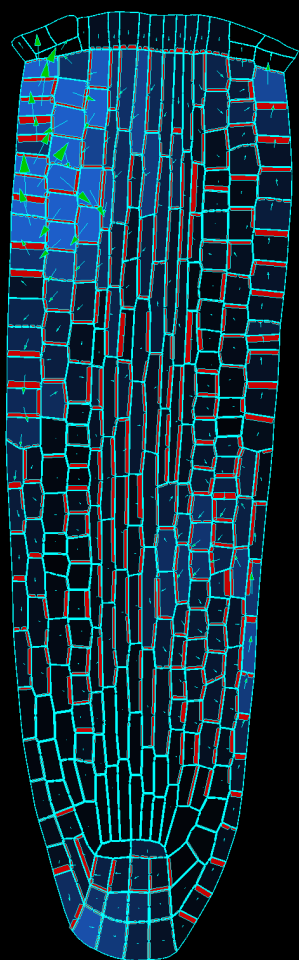

C

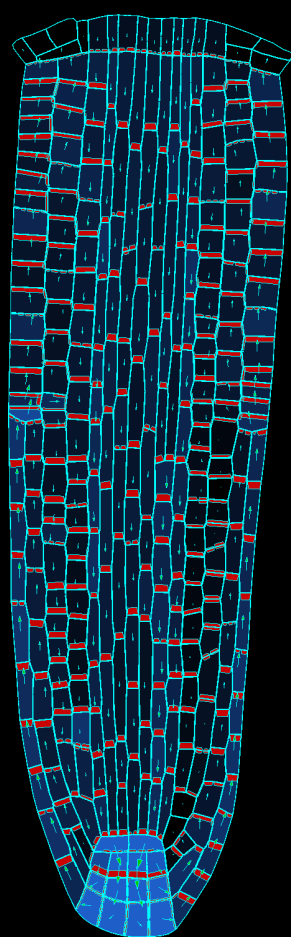

D

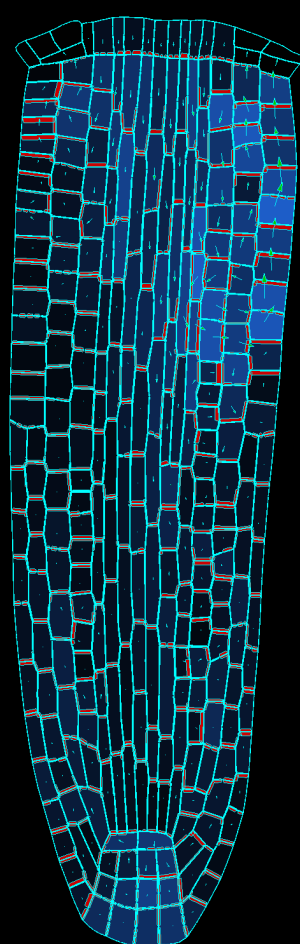

Supplement: supp [file elife-72132-supp-v1.zip]

A

### Vascular PINs knockdown

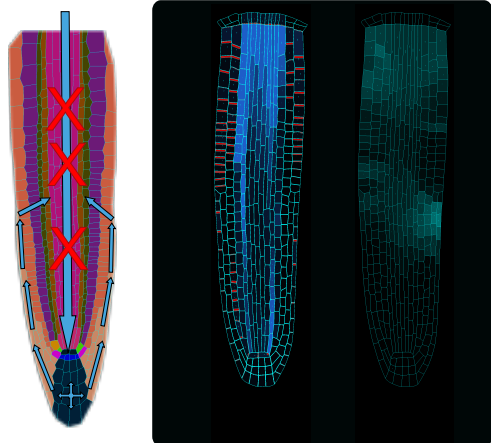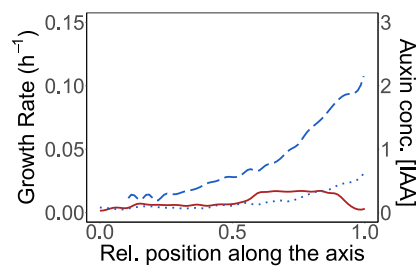

B

### *aux1* knockdown

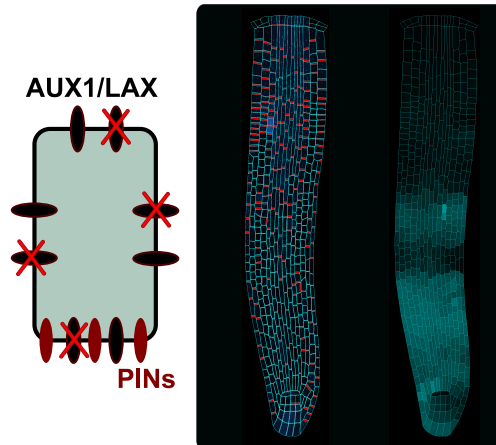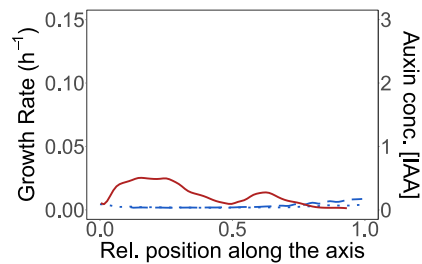

C

### QC ablation

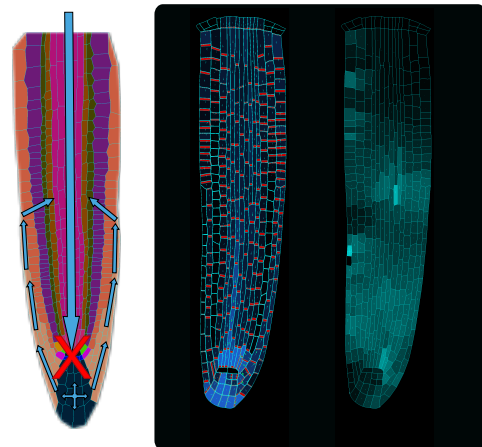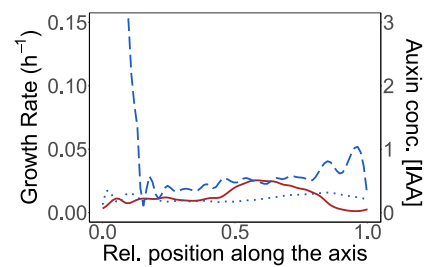

D

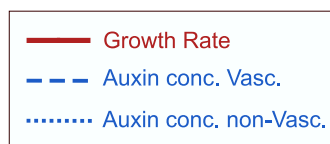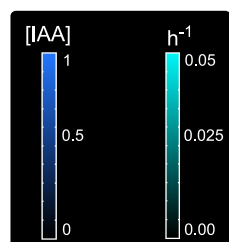

Supplement: supp [file elife-72132-supp-v1.zip]

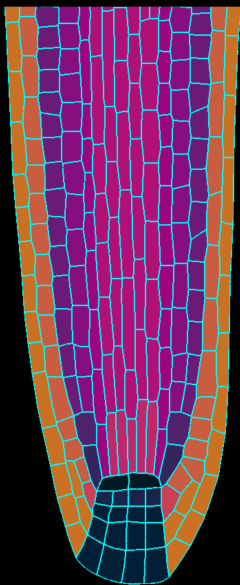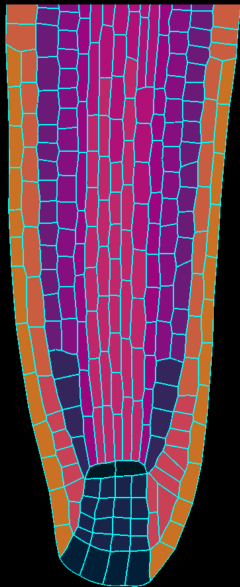

Supplement: supp [file elife-72132-supp-v1.zip]

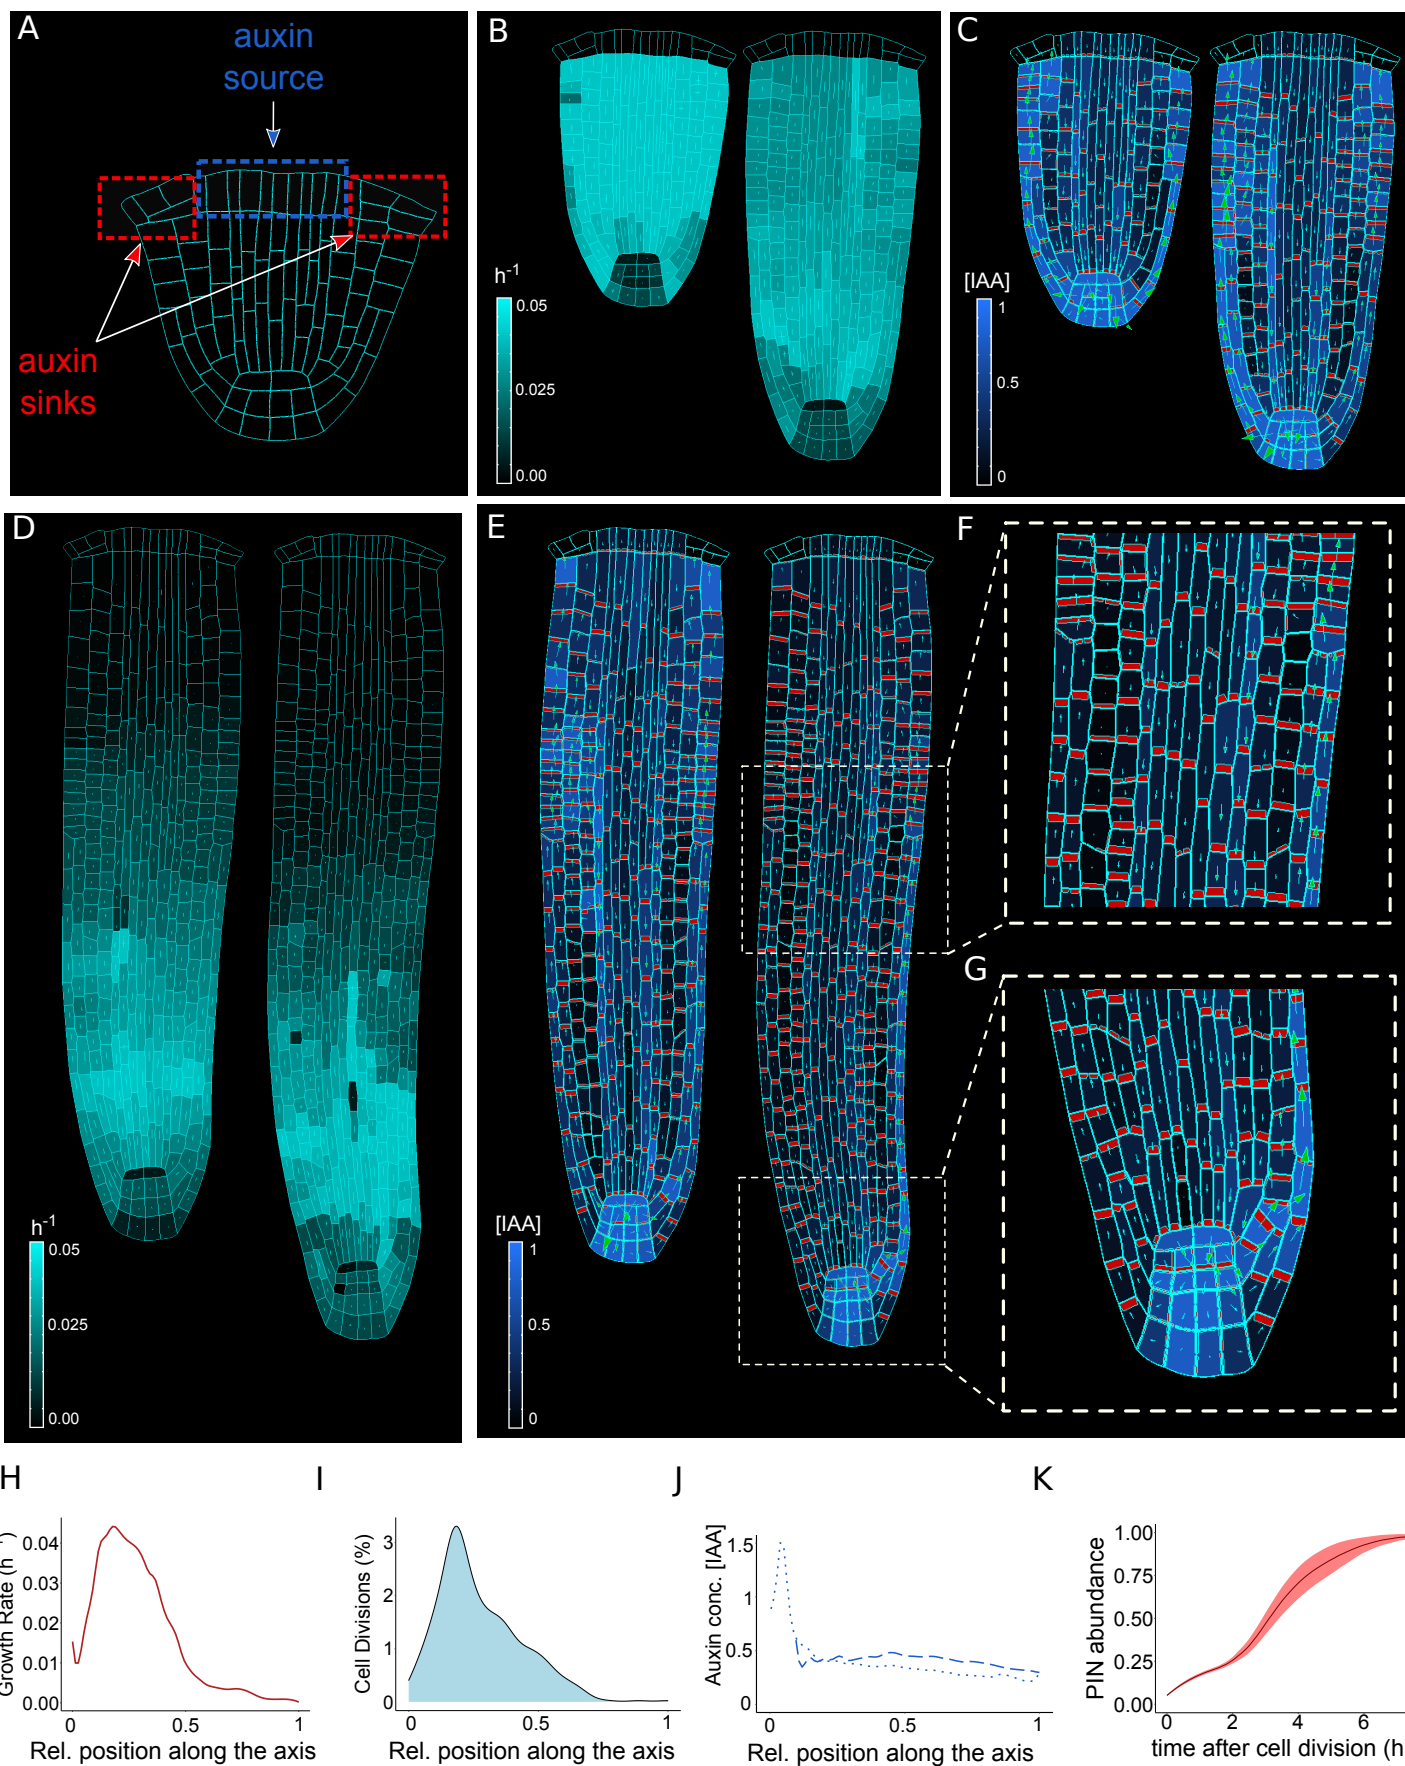

Supplement: supp [file elife-72132-supp-v1.zip]

A

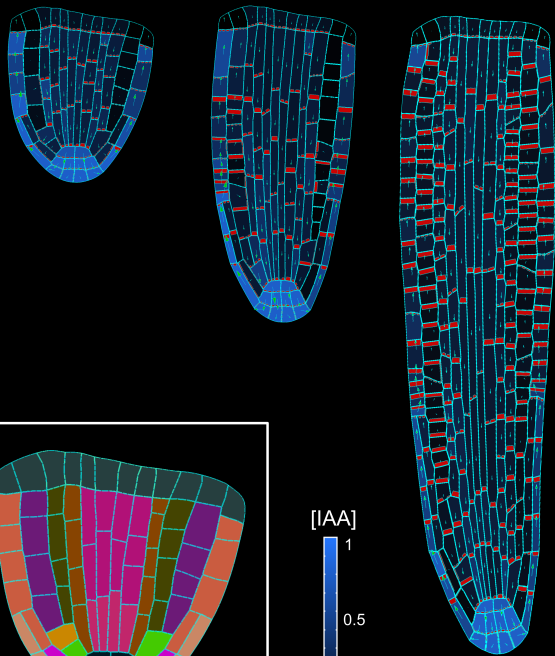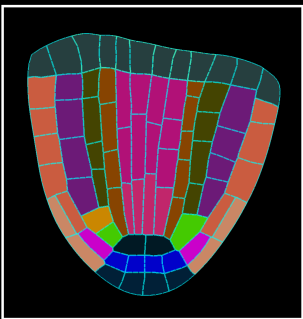

[IAA]  
1  
0.5  
0

B

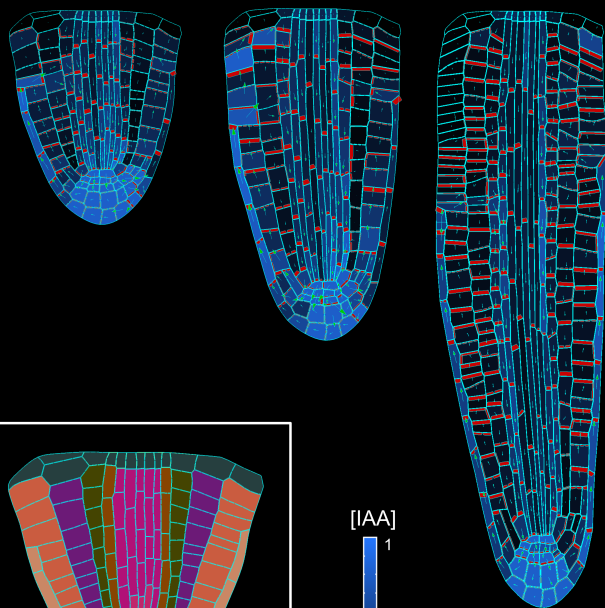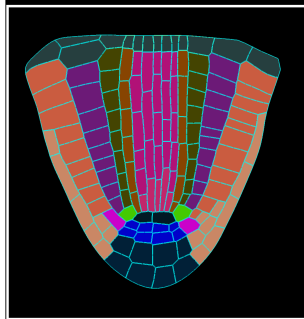

[IAA]  
1  
0.5  
0

Supplement: supp [file elife-72132-supp-v1.zip]

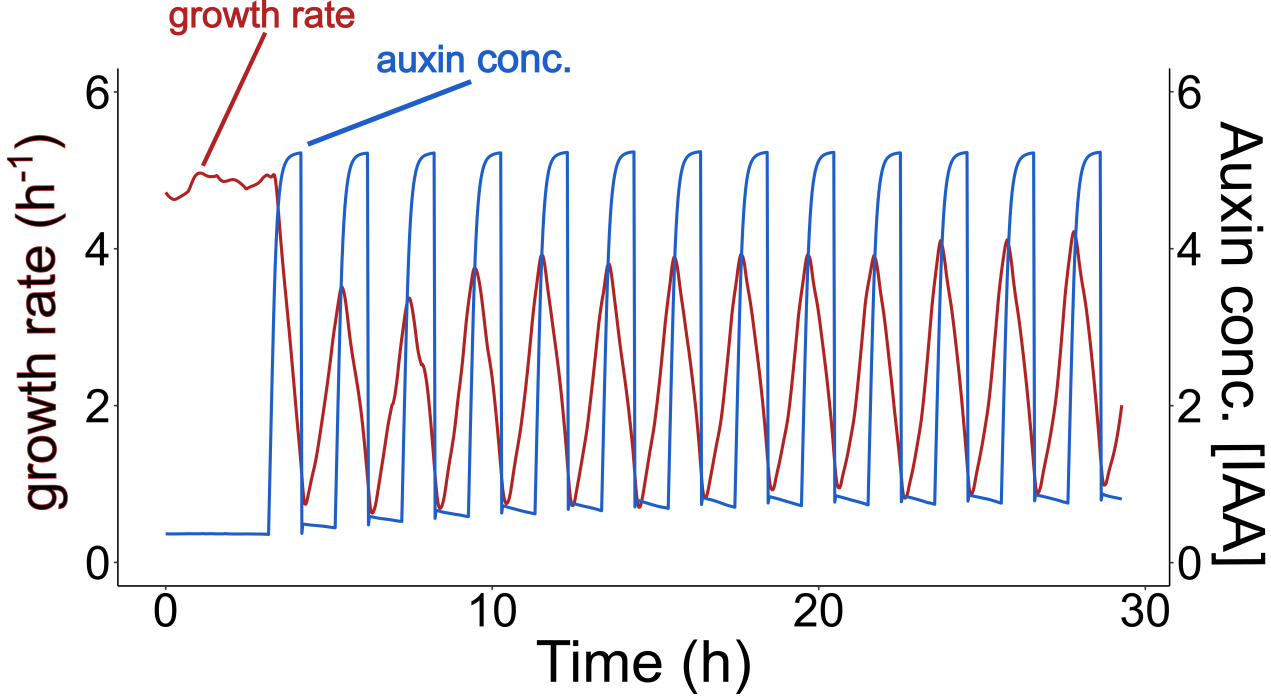

Supplement: supp [file elife-72132-supp-v1.zip]

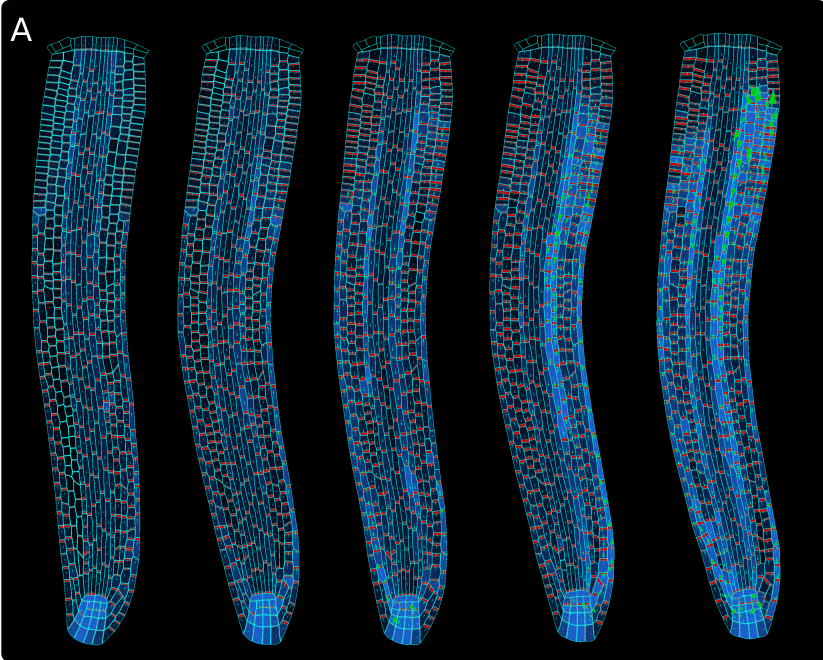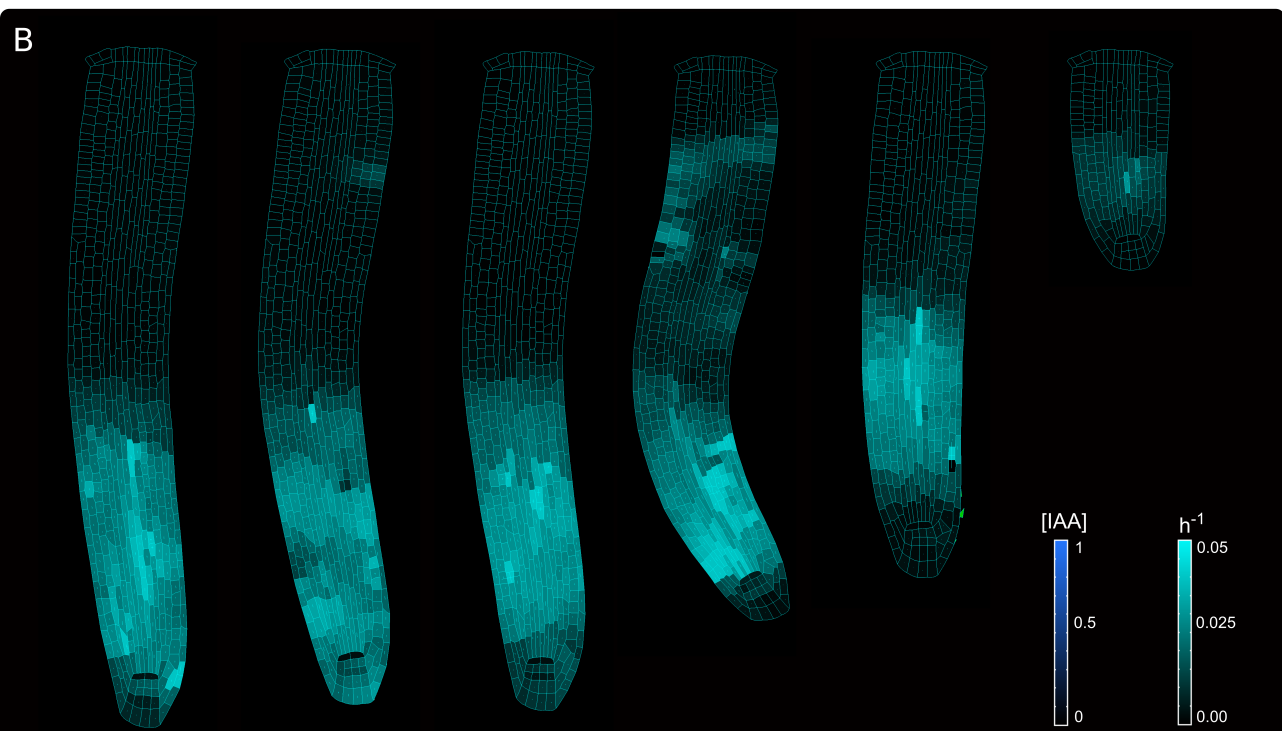

Supplement: supp [file elife-72132-supp-v1.zip]

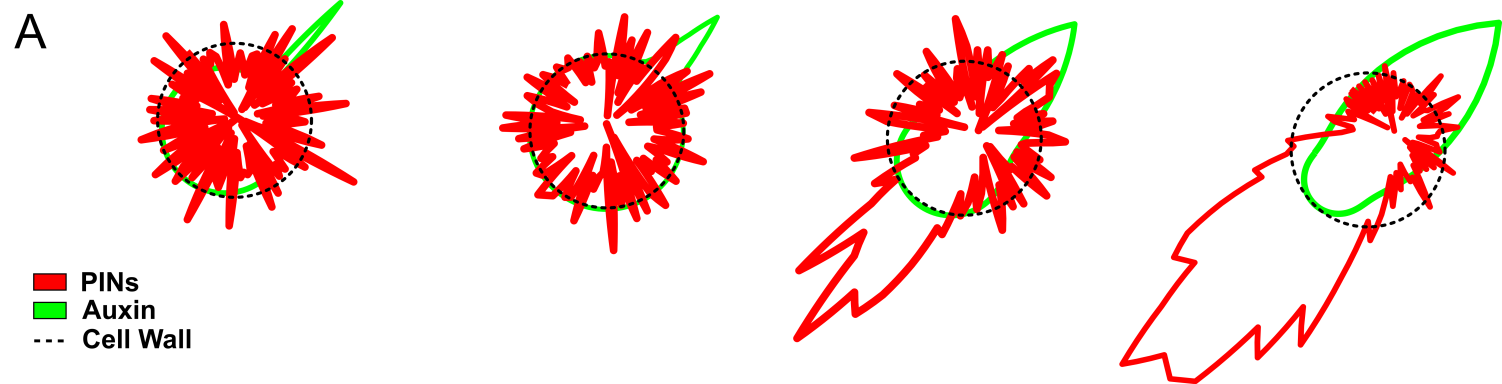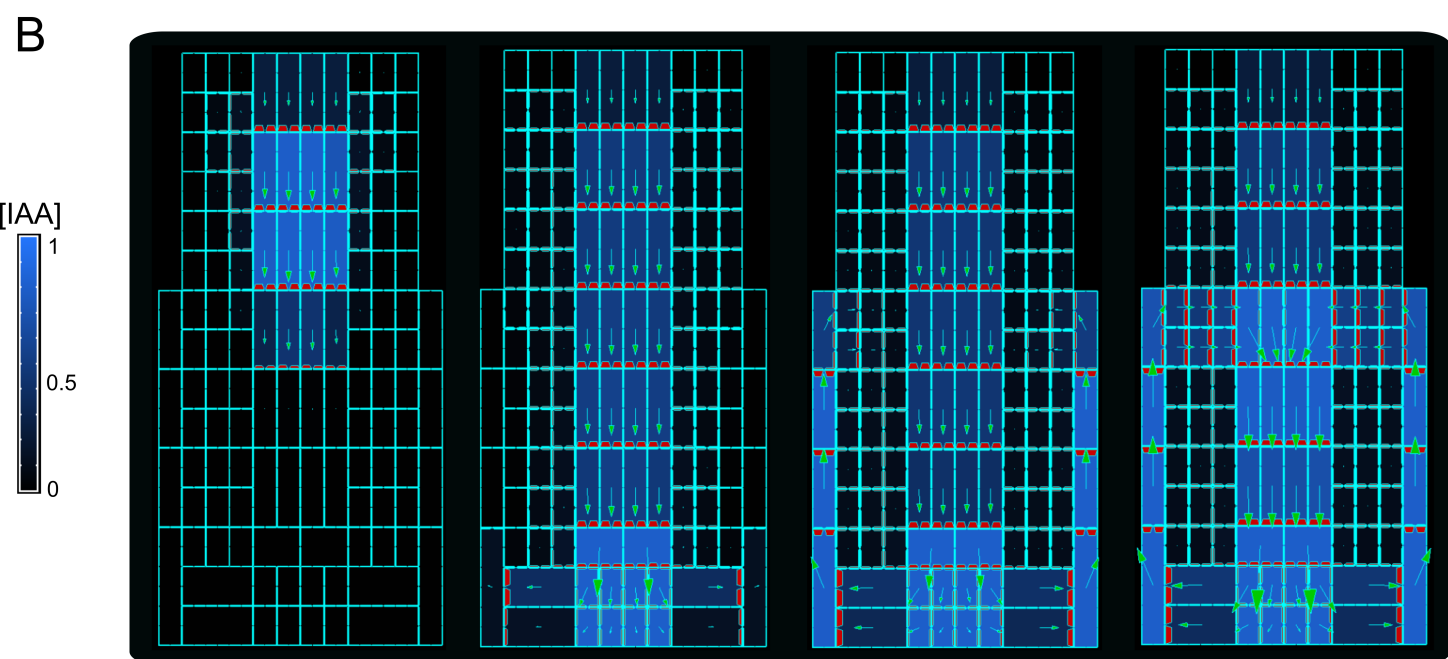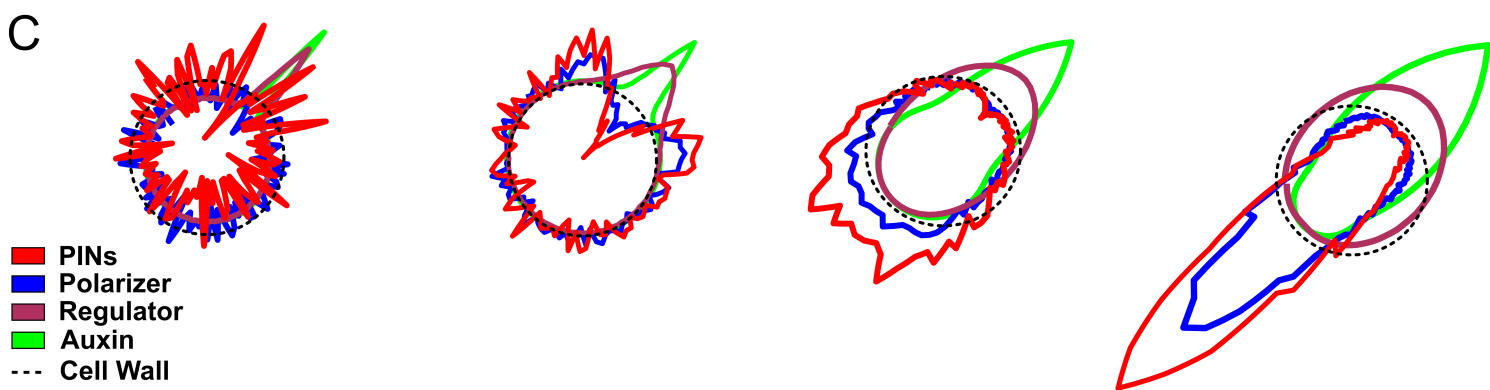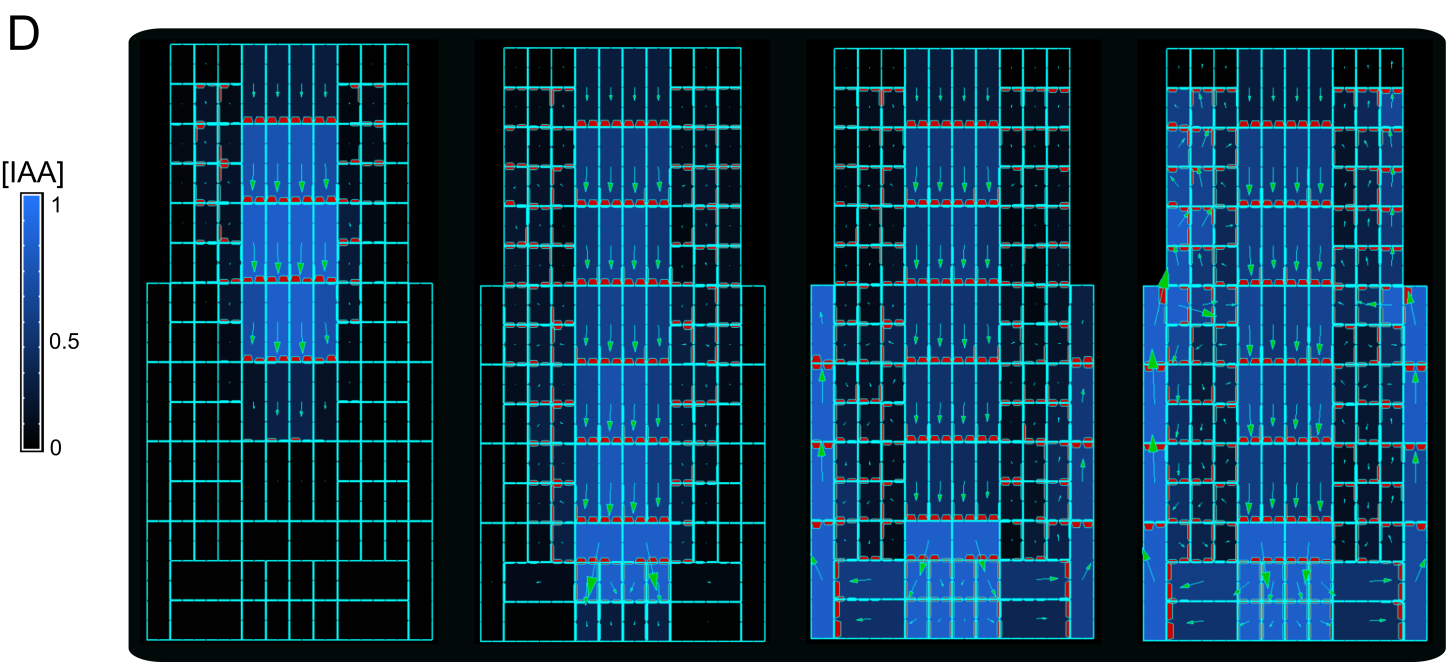

Supplement: supp [file elife-72132-supp-v1.zip]

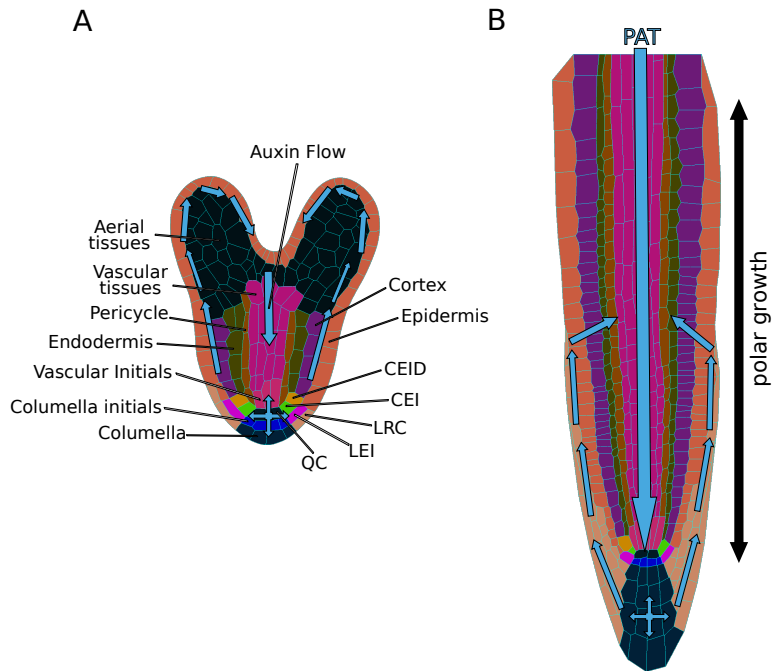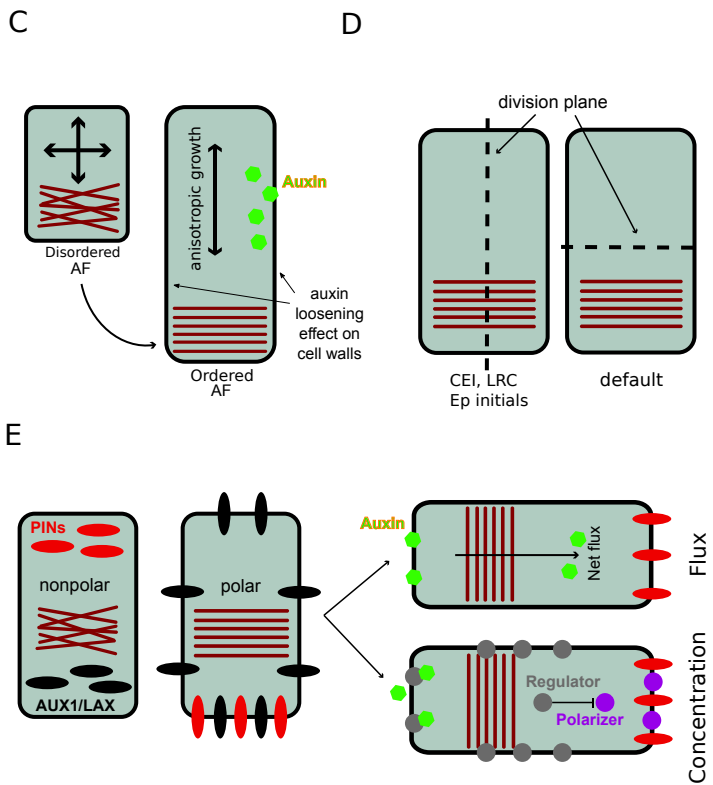

Supplement: supp [file elife-72132-supp-v1.zip]
